# Supplementary material for: Asymmetric generation of fluorine-containing quaternary carbons adjacent to tertiary stereocenters: uses of fluorinated methines as nucleophiles
Source: Royal Society of Chemistry journal article supplement (doi:10.1039/b823184b), 2009-01-01

# Asymmetric Generation of Fluorine-Containing Quaternary Carbons Adjacent to Tertiary Stereocenters: Uses of Fluorinated Methines as Nucleophiles

Xiao Han, Jie Luo, Chen Liu and Yixin Lu\*

*Department of Chemistry & Medicinal Chemistry Program, Life Sciences Institute,  
National University of Singapore, 3 Science Drive 3, Singapore, 117543*

Email: [chmlyx@nus.edu.sg](mailto:chmlyx@nus.edu.sg)

## Supporting Information

|                                                                                   |     |
|-----------------------------------------------------------------------------------|-----|
| <b>A.</b> General Information                                                     | S2  |
| <b>B.</b> Representative Procedure                                                | S3  |
| <b>C.</b> Determination of Absolute Configurations of the Michael Products        | S4  |
| <b>D.</b> Conversion of Michael Adduct to Chiral Lactam and Pyrrolidine           | S7  |
| <b>E.</b> Analytical Data and HPLC Chromatogram of Substrates and Michael Adducts | S8  |
| <b>F.</b> NMR Spectra of Products                                                 | S29 |

## **A. General Information**

Chemicals and solvents were purchased from commercial suppliers and used as received.  $^1\text{H}$  and  $^{13}\text{C}$  NMR spectra were recorded on a Bruker ACF300 or DPX300 (300 MHz) or AMX500 (500 MHz) spectrometer. Chemical shifts were reported in parts per million (ppm), and the residual solvent peak was used as an internal reference: proton (chloroform  $\delta$  7.26), carbon (chloroform  $\delta$  77.0). Multiplicity was indicated as follows: s (singlet), d (doublet), t (triplet), q (quartet), m (multiplet), dd (doublet of doublet), br s (broad singlet). Coupling constants were reported in Hertz (Hz). Low resolution mass spectra were obtained on a Finnigan/MAT LCQ spectrometer in ESI mode, and a Finnigan/MAT 95XL-T mass spectrometer in FAB mode. All high resolution mass spectra were obtained on a Finnigan/MAT 95XL-T spectrometer. For thin-layer chromatography (TLC), Merck pre-coated TLC plates (Merck 60 F<sub>254</sub>) were used, and compounds were visualized with a UV light at 254 nm. Further visualization was achieved by staining with iodine, or ceric ammonium molybdate followed by heating on a hot plate. Flash chromatography separations were performed on Merck 60 (0.040 - 0.063 mm) mesh silica gel. The enantiomeric excesses of products were determined by chiral-phase HPLC analysis.

Substrates **4** and **6a-6e** were prepared according to the literature procedures.<sup>1</sup>

## B. Representative Procedure

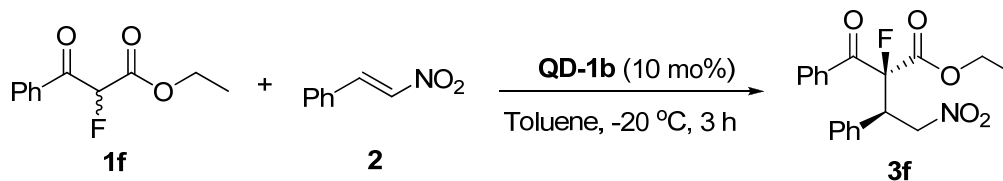

Ethyl 2-fluoro-3-oxo-3-phenylpropanoate **1f** (10.5 mg, 0.05 mmol) was added to a mixture of catalyst **QD-1b** (3 mg, 0.005 mmol) and nitroolefin **2** (7.45 mg, 0.05 mmol) in toluene (0.1 mL) in a sample vial. The vial was then capped and the reaction mixture was stirred at -20 °C for 3 h, and quenched with the addition of aqueous HCl (1 N). The organic layer was extracted with ethyl acetate three times (3 x 5 mL). The combined organic extracts were dried over anhydrous Na<sub>2</sub>SO<sub>4</sub>, filtered, and concentrated *in vacuo*. Purification by flash column chromatography (ethyl acetate/hexanes = 1:15 to 1:5) afforded the desired product **3f** as a white solid (17.1 mg, 95%). The enantiomeric excess of product was determined by chiral HPLC analysis.

### C. Determination of Absolute Configurations of the Michael Products

#### Determination of absolute configuration of 3f

Michael adduct **3f** was reduced to the corresponding alcohol by  $\text{Ph}_3\text{SiH}/\text{AlCl}_3$ . It was well documented in the literature<sup>2</sup> that the reduction of  $\alpha$ -fluoro- $\beta$ -ketoesters by  $\text{Ph}_3\text{SiH}/\text{AlCl}_3$  led to the formation of *anti*-isomer, and the formation of which can be explained by the chelation model shown below. Therefore, the configurations at the fluorine chiral center and the hydroxyl chiral center can be either both *S* or *R*.

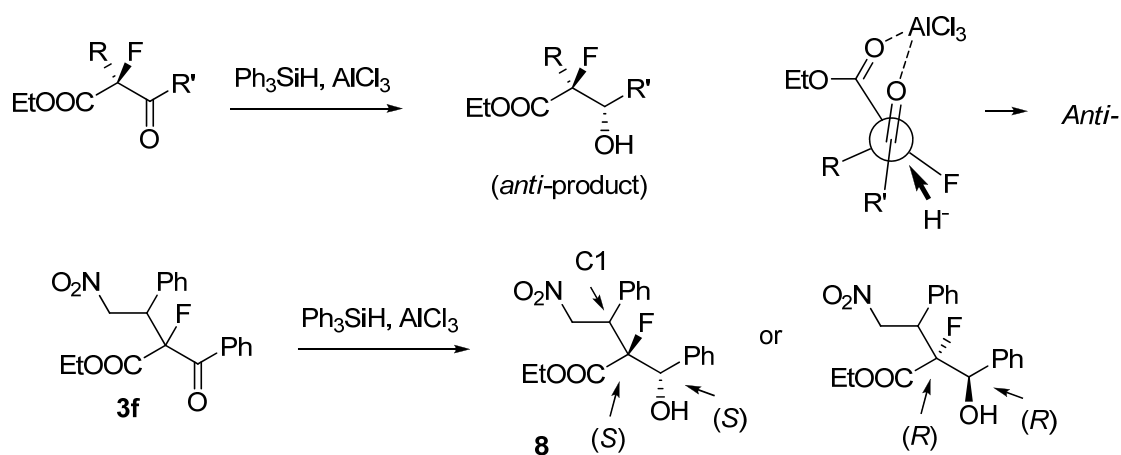

The absolute configuration at the hydroxyl chiral center was determined to be *S*, by using Mosher's method.<sup>3</sup> Thus, the configuration at the fluorine chiral center was assigned to be *S* (alcohol **8** in the above Scheme).

Lactam **9** derived from alcohol **8** was used to determine the chiral center at C1 in the Michael adduct. 2D-NOESY experiment showed correlation between Ha and Hb in lactam **9**, thus absolute configuration of **9** could be determined. The absolute configuration of Michael adduct **3f** was deduced accordingly. Configurations of other Michael adducts were assigned by analogy.

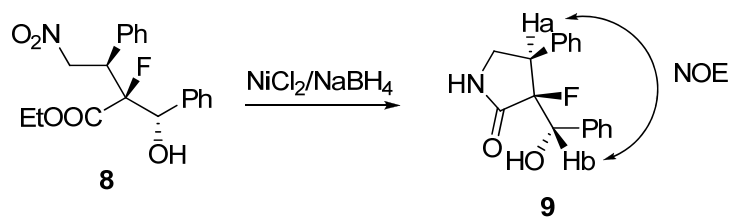

The below Scheme describes the reaction employed in the assignment of absolute configuration of Michael adduct **3f** and the formation of lactam **9**.

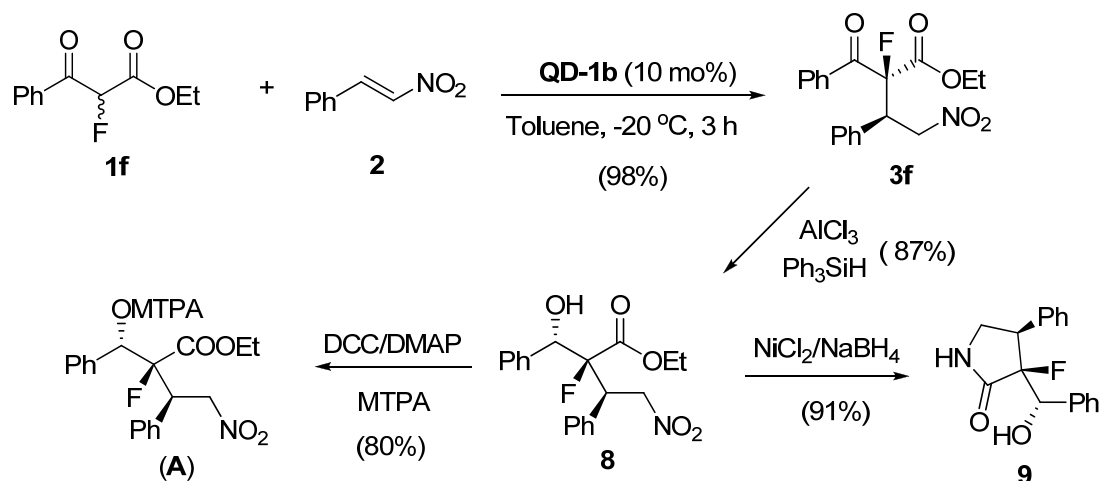

### **(2*S*,3*R*)-Ethyl 2-fluoro-2-((*S*)-hydroxy(phenyl)methyl)-4-nitro-3-phenylbutanoate **8****

To a stirring solution of **3f** (230 mg, 0.64 mmol) in dichloromethane (3 mL) were added  $\text{Ph}_3\text{SiH}$  (252 mg, 0.97 mmol) and  $\text{AlCl}_3$  (130 mg, 0.97 mmol) at  $-30\text{ }^\circ\text{C}$ . The reaction mixture was kept at this temperature for 3.5 h. The mixture was then diluted with ether (5 mL), and saturated  $\text{NaHCO}_3$  was added. Aqueous layer was extracted with ether (3 x 10 mL), and the combined organic layers were washed with water and brine, and dried over  $\text{Na}_2\text{SO}_4$ . Purification by flash column chromatography (hexane: ethyl acetate = 5:1) afforded **8** as a white powder (201 mg, 87%).

$^1\text{H}$  NMR (300 MHz,  $\text{CDCl}_3$ )  $\delta$  0.89-0.92 (t, 3H), 2.49-2.51 (m, 1H), 2.36 (s, 1H), 3.85-3.96 (m, 2H), 4.34-4.45 (m, 1H), 5.02-5.27 (m, 3H), 7.28-7.35 (m, 10H);  $^{13}\text{C}$  NMR (100 MHz,  $\text{CDCl}_3$ )  $\delta$  13.5, 47.6 (d,  $J = 25.5$  Hz), 62.0, 74.8 (d,  $J = 19.1$  Hz), 75.7 (d,  $J = 7.3$  Hz), 98.6 (d,  $J = 203.1$  Hz), 127.9, 128.0, 128.4, 128.6, 128.8, 129.1, 133.7, 136.8, 168.3 (d,  $J = 22.7$  Hz).

### **Preparation of (*R*)-MTPA (2-methoxy-2-trifluoromethyl-2-phenylacetic acid) Ester **A****

Compound **8** (18 mg, 0.05 mmol) was dissolved in  $\text{CH}_2\text{Cl}_2$  (2 mL) and (*R*)-MTPA (23 mg, 0.01 mmol), DCC (26mg, 0.125 mmol) and DMAP (1.0 mg, 0.01 mmol) were added at  $0\text{ }^\circ\text{C}$ . After stirring at  $0\text{ }^\circ\text{C}$  for 5 min and half an hour at room temperature, the reaction was quenched

by addition of water (1 mL) and ether (5 mL). The organic layer was washed with brine, and dried over NaSO<sub>4</sub>. The solvent was removed *in vacuo*, and the residue was purified by column chromatography on silica gel (hexane: ethyl acetate = 10:1) to afford **A** as a colorless oil (23 mg, 80%).

<sup>1</sup>H NMR (500 MHz, CDCl<sub>3</sub>) δ 0.88-0.99 (t, 3H), 3.47 (s, 3H), 3.88-3.96 (m, 2H), 4.04-4.10 (m, 1H), 4.81-4.85 (dd, *J* = 14.5 Hz, 3.75 Hz, 1H), 5.07-5.12 (dd, *J* = 13.5 Hz, 12.0 Hz, 1H), 6.26-6.30 (d, *J* = 22.7 Hz), 7.05-7.07 (m, 2H), 7.27-7.36 (m, 13H); <sup>13</sup>C NMR (125 MHz, CDCl<sub>3</sub>) δ 13.5, 29.7, 46.8, 55.7, 62.5, 75.2, 85.5, 97.5, 124.1, 127.2, 128.3, 128.6, 128.8, 128.9, 129.0, 129.2, 129.9, 131.7, 132.0, 132.6, 166.4, 167.3; HRMS (IT-TOF) *m/z* calcd for C<sub>17</sub>H<sub>16</sub>FNO<sub>2</sub> [M+Na]<sup>+</sup> = 308.1063, found = 308.0771.

#### **(S)-MTPA Ester**

<sup>1</sup>H NMR (500 MHz, CDCl<sub>3</sub>) δ 0.96-0.99 (t, 3H), 3.56 (s, 3H), 3.98-4.11 (m, 2H), 4.12-4.17 (m, 1H), 4.76-4.80 (dd, *J* = 13.3 Hz, 3.75 Hz, 1H), 5.03-5.09 (dd, *J* = 13.2 Hz, 11.3 Hz, 1H), 6.18-6.23 (d, *J* = 20.8 Hz), 7.06-7.08 (m, 2H), 7.27-7.36 (m, 13H); <sup>13</sup>C NMR (125 MHz, CDCl<sub>3</sub>) δ 13.5, 29.7, 46.8, 55.7, 62.5, 75.2, 85.5, 97.5, 124.1, 127.2, 128.3, 128.6, 128.8, 128.9, 129.0, 129.2, 129.9, 131.7, 132.0, 132.6, 166.4, 167.3.

The absolute configuration at the hydroxyl chiral center was assigned to be *S*, based on the differences in the chemical shifts observed in both diastereomers, according to the model developed by Mosher and Dale.<sup>3</sup>

#### **(3*S*,4*R*)-3-Fluoro-3-((*S*)-hydroxy(phenyl)methyl)-4-phenylpyrrolidin-2-one 9**

To a suspension of **8** (36 mg, 0.1 mmol) and NiCl<sub>2</sub> (25.6 mg, 0.2 mmol) in MeOH (1.0 mL) at 0 °C under argon was added NaBH<sub>4</sub> (38 mg, 1.0 mmol). After the mixture was stirred at room temperature for 8 hours, the reaction mixture was quenched by the addition of saturated aqueous NH<sub>4</sub>Cl, and then diluted with CHCl<sub>3</sub>. The organic layer was separated, and dried over MgSO<sub>4</sub>. The solvent was removed *in vacuo*, and the residue was purified by column chromatography (hexane: ethyl acetate = 5:1) to afford the desired product as a white solid (26 mg, 91%).

<sup>1</sup>H NMR (500 MHz, CDCl<sub>3</sub>) δ 3.53-3.66 (m, 3H), 3.81 (br, 1H), 5.21-5.25 (d, *J* = 2.2 Hz, 1H),

6.45 (s, 1H, -OH), 6.97-6.99 (m, 2H), 7.17-7.19 (m, 3H), 7.26-7.28 (m, 3H), 7.41-7.43 (m, 2H);  $^{13}\text{C}$  NMR (125 MHz,  $\text{CDCl}_3$ )  $\delta$  44.0 (d,  $J = 18.2$  Hz), 46.9, 73.2 (d,  $J = 28.2$  Hz), 95.5 (d,  $J = 190.4$  Hz), 127.1, 127.3, 128.1, 128.2, 128.3, 129.3, 129.4, 135.0, 135.1, 137.7, 172.5; HRMS (IT-TOF)  $m/z$  calcd for  $\text{C}_{19}\text{H}_{17}\text{BrFNO}_5$   $[\text{M}]^+ = 600.1621$ , found = 600.1038.

## D. Conversion of Michael Adduct to Chiral Lactam and Pyrrolidine

### D.1 Conversion of Michael Adduct to Chiral Lactam

The procedure for the preparation of lactam **9** is described in section C.

### D.2 Conversion of Michael Adduct to Pyrrolidine

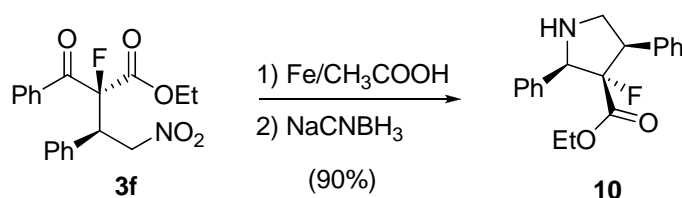

### (2R,3S,4R)-Ethyl 3-fluoro-2,4-diphenylpyrrolidine-3-carboxylate 10

To a solution of **3f** (18 mg, 0.05 mmol) in ethanol (0.5 mL), Fe (56 mg, 0.25 mmol) and acetic acid (0.1 mL) were added. After the reaction mixture was stirred at 50 °C for 12 h, the mixture was cooled to room temperature, and  $\text{NaBH}_3\text{CN}$  (6.3 mg, 0.10 mmol) was added. The mixture was stirred at room temperature for another hour. The reaction was quenched by adding saturated  $\text{NH}_4\text{Cl}$  aqueous solution and extracted with  $\text{CHCl}_3$ . The organic layer was separated and dried over  $\text{MgSO}_4$ . The solvent was removed *in vacuo*, and the residue was purified by column chromatography (hexane: ethyl acetate = 5:1) to afford pyrrolidine **10** as a colorless oil (14 mg, 90%).

$^1\text{H}$  NMR (500 MHz,  $\text{CDCl}_3$ )  $\delta$  0.68-0.71 (t, 3H), 3.59-3.63 (m, 2H), 3.74-3.84 (m, 2H), 4.10-4.15 (m, 1H), 4.77-4.81 (d,  $J = 14.5$  Hz, 1H), 7.23-7.32 (m, 8H), 7.41-7.45 (d, 2H);  $^{13}\text{C}$  NMR (125 MHz,  $\text{CDCl}_3$ )  $\delta$  13.49, 48.42 (d,  $J = 9.11$  Hz), 54.53 (d,  $J = 20.03$  Hz), 60.84, 69.55 (d,  $J = 23.68$  Hz), 105.2 (d,  $J = 190.4$  Hz), 126.09, 127.43, 127.78, 127.80, 128.28, 128.38, 136.28, 136.87, 167.49 (d,  $J = 28.23$  Hz); HRMS (IT-TOF)  $m/z$  calcd for  $\text{C}_{19}\text{H}_{20}\text{FNO}_2$   $[\text{M}]^+ = 313.1478$ , found = 314.1208.

## **E. Analytical Data and HPLC Chromatogram of Substrates and Michael Adducts**

**Substrates:** **1f** and **6a-6f** were prepared according to the literature procedure.<sup>1</sup>

### **Ethyl 2-fluoro-3-oxo-3-phenylpropanoate 1f**

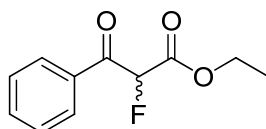

A colorless oil; <sup>1</sup>H NMR (300 MHz, CDCl<sub>3</sub>) δ 1.25-1.32 (t, 3H), 4.26-4.34 (m, 2H), 5.78-5.94 (d, *J* = 48.81 Hz, 1H), 7.48-7.53 (m, 2H), 7.61-7.68 (m, 1H), 8.03-8.05 (d, 2H).

### **Ethyl 2-fluoro-3-(4-methoxyphenyl)-3-oxopropanoate 6a**

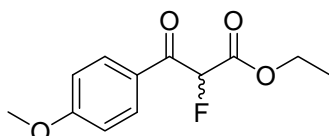

A colorless oil; <sup>1</sup>H NMR (500 MHz, CDCl<sub>3</sub>) δ 1.25-1.27 (t, 3H), 3.88 (s, 3H), 4.26-4.33 (m, 2H), 5.76-5.86 (d, *J* = 49.15 Hz, 1H), 6.95-6.97 (m, 2H), 8.03-8.05 (d, 2H).

### **Ethyl 3-(3-chlorophenyl)-2-fluoro-3-oxopropanoate 6b**

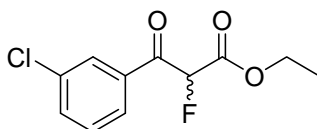

A colorless oil; <sup>1</sup>H NMR (300 MHz, CDCl<sub>3</sub>) δ 1.25-1.30 (t, 3H), 4.27-4.35 (m, 2H), 5.73-5.89 (d, *J* = 48.66 Hz, 1H), 7.42-7.48 (t, 1H), 7.59-7.60 (m, 1H), 7.91-7.94 (m, 1H), 8.01 (s, 1H).

### **Ethyl 2-fluoro-3-(4-nitrophenyl)-3-oxopropanoate 6c**

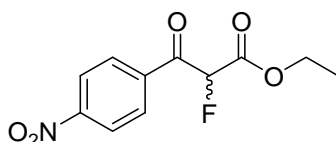

A yellow oil; <sup>1</sup>H NMR (300 MHz, CDCl<sub>3</sub>) δ 1.26-1.30 (t, 3H), 4.31-4.34 (m, 2H), 5.75-5.91 (d, *J* = 48.66 Hz, 1H), 8.20-8.24 (dd, 2H), 8.33-8.36 (d, 2H).

### **Ethyl 2-fluoro-3-oxo-3-(4-(trifluoromethyl)phenyl)propanoate 6d**



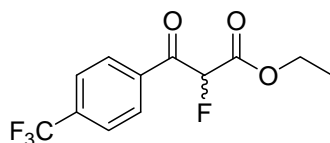

A colorless oil;  $^1\text{H NMR}$  (300 MHz,  $\text{CDCl}_3$ )  $\delta$  1.25-1.30 (t, 3H), 4.28-4.35 (m, 2H), 5.75-5.91 (d,  $J = 48.81$  Hz, 1H), 7.76-7.78 (d, 2H), 8.14-8.17 (d, 2H).

### Ethyl 2-fluoro-4,4-dimethyl-3-oxopentanoate **6e**

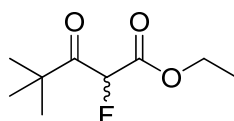

A colorless oil;  $^1\text{H NMR}$  (300 MHz,  $\text{CDCl}_3$ )  $\delta$  1.24-1.25 (d,  $J = 1.14$  Hz, 9H), 1.28-1.33 (t, 3H), 4.26-4.34 (m, 2H), 5.39-5.55 (d,  $J = 48.81$  Hz, 1H).

### Michael Adducts

### Ethyl-2-acetyl-4-nitro-3-phenylbutanoate **3a**

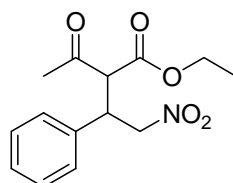

A white solid;  $^1\text{H NMR}$  (300 MHz,  $\text{CDCl}_3$ )  $\delta$  0.97-1.02 (t, 1.6H), 1.25-1.30 (t, 1.4H), 2.05 (s, 1.3H), 2.29 (s, 1.7H), 3.92-4.03 (m, 1.5H), 4.09-4.27 (m, 2.5H), 4.74-76 (d,  $J = 6.06$  Hz, 1.2H), 4.81-4.84 (dd, 0.8H), 7.18-7.31 (m, 5H); HPLC [Chiralcel AD-H,  $\lambda = 220$  nm, 15% *i*PrOH/hexane, flow rate = 0.75 mL/min, retention times: (major diastereomer) 9.1 12.1 min, (minor diastereomer) 13.0 21.5 min].

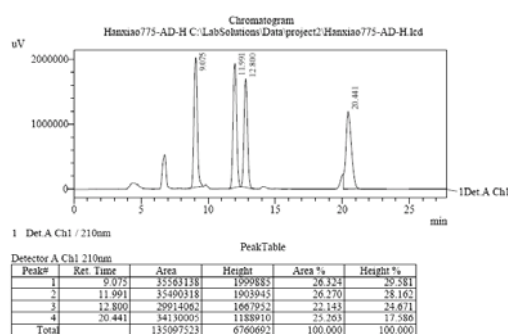

Racemic **3a**

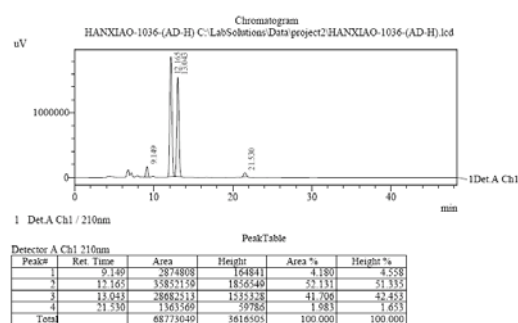

Enantiomeric enriched **3a**

### Benzyl-2-acetyl-4-nitro-3-phenylbutanoate **3b**

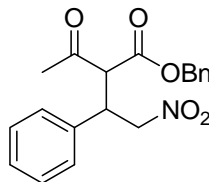

A colorless oil;  $^1\text{H}$  NMR (300 MHz,  $\text{CDCl}_3$ )  $\delta$  2.00 (s, 1.3H), 2.25 (s, 1.7H), 4.03-4.06 (d,  $J = 9.54$  Hz, 0.5), 4.15-4.28 (m, 1.5H), 4.73-4.80 (m, 2H), 4.93 (s, 1.1H), 5.19 (s, 0.9H), 7.07-7.28 (m, 10H);  $^{13}\text{C}$  NMR (75 MHz,  $\text{CDCl}_3$ )  $\delta$  30.07, 30.17, 42.23, 42.50, 61.16, 61.83, 67.64, 67.82, 77.74, 127.78, 127.83, 128.24, 128.32, 128.46, 128.53, 128.69, 128.75, 128.96, 129.10, 134.45, 134.59, 136.21, 166.68, 167.33, 199.92, 200.86; The ee values for both major and minor diastereomers were 85% (Chiralcel AD-H,  $\lambda = 220$  nm, 15% *i*PrOH/hexane, flow rate = 0.75 mL/min,  $t_R$  (major) = 12.8 min, 20.4 min,  $t_R$  (minor) = 16.9 min, 26.4 min).

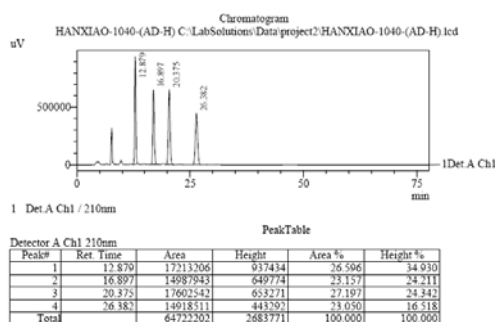

Racemic **3b**

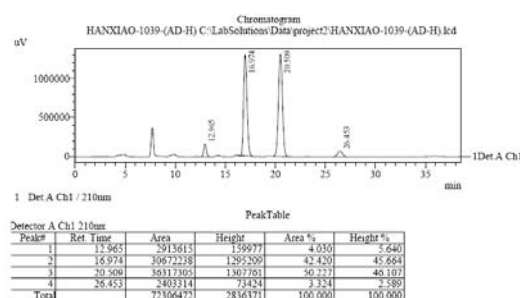

Enantiomeric enriched **3b**

### Ethyl-2-benzoyl-4-nitro-3-phenylbutanoate **3c**

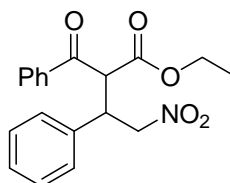

A colorless oil;  $^1\text{H}$  NMR (300 MHz,  $\text{CDCl}_3$ )  $\delta$  0.87-0.92 (t, 1.7H), 1.15-1.19 (t, 1.3H), 3.83-3.91 (m, 1.1H), 4.15-4.39 (m, 0.9H), 4.41-4.53 (m, 1H), 4.73-4.85 (m, 1.1H), 4.89-4.96 (m, 1.9H), 7.17-7.33 (m, 5H), 7.39-7.65 (m, 3H), 7.82-7.89 (m, 0.9H), 8.05-8.09 (m, 1.1H);  $^{13}\text{C}$  NMR (75

MHz, CDCl<sub>3</sub>)  $\delta$  13.50, 13.81, 42.99, 43.03, 56.30, 56.94, 61.87, 62.14, 77.89, 127.89, 128.04, 128.20, 128.26, 128.48, 128.66, 128.82, 128.84, 128.87, 133.74, 134.15, 135.76, 135.95, 136.17, 136.68, 166.88, 167.62, 192.61, 192.67; The ee values of both diastereomers were 88% (Chiralcel AD-H,  $\lambda$  = 220 nm, 15% *i*PrOH/hexane, flow rate = 0.75 mL/min,  $t_R$  (major) = 21.5 min, 38.6 min,  $t_R$  (minor) = 16.6 min, 19.4 min).

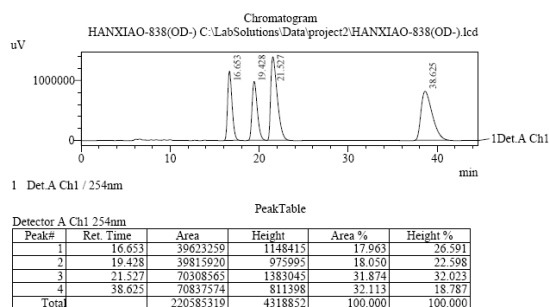

Racemic **3c**

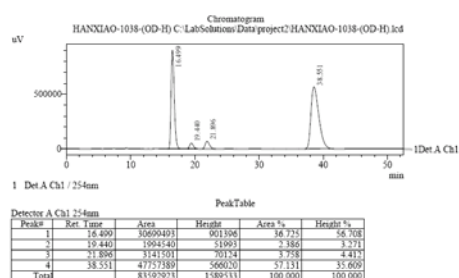

Enantiomeric enriched **3c**

### Ethyl-2-acetyl-2-methyl-4-nitro-3-phenylbutanoate **3d**

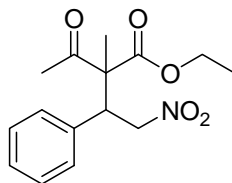

A white solid; <sup>1</sup>H NMR (300 MHz, CDCl<sub>3</sub>)  $\delta$  1.18-1.21 (t, 1.8H), 1.29-1.32 (t, 1.2H), 1.45 (s, 3H), 2.11 (s, 1.8H), 2.17 (s, 1.2H), 4.01-4.10 (m, 0.6H), 4.11-4.15 (m, 1H), 4.21-4.30 (m, 1.4H), 4.87-4.98 (m, 2H), 7.11-7.12 (t, 0.8H), 7.13 (d, *J* = 1.53 Hz, 1.2H), 7.20-7.27 (m, 3H); The ee values of the major and minor diastereomers were 94% and 93%, respectively (Chiralcel OD-H,  $\lambda$  = 210 nm, 10% *i*PrOH/hexane, flow rate = 0.50 mL/min,  $t_R$  (major) = 20.7 min, 30.6 min,  $t_R$  (minor) = 19.1 min, 39.4 min), which were consistent with literature values.<sup>4</sup>

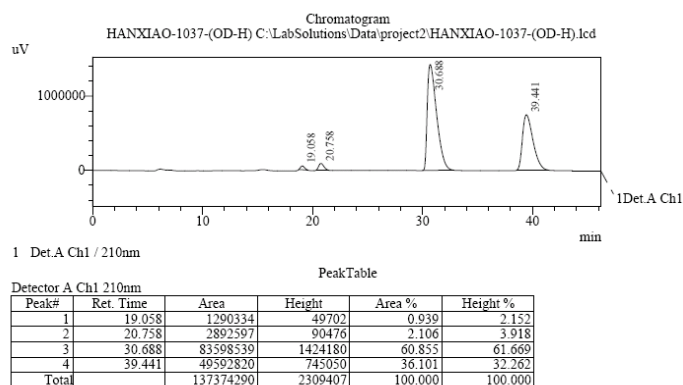

### Enantiomeric enriched **3d**

### (2S, 3R)-Ethyl 2-acetyl-2-fluoro-4-nitro-3-phenylbutanoate **3e**

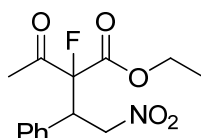

A colorless oil;  $^1\text{H}$  NMR (300 MHz,  $\text{CDCl}_3$ )  $\delta$  1.31-1.37 (t, 3.0H), 1.86-1.88 (d,  $J = 5.61$  Hz, 3H), 4.29-4.37 (m, 2H), 4.49-65 (m, 1H), 4.81-4.90 (m, 2H), 7.26-7.39 (m, 5H);  $^{13}\text{C}$  NMR (75 MHz,  $\text{CDCl}_3$ )  $\delta$  13.90, 26.37, 47.17 (d,  $J = 18.00\text{Hz}$ ), 63.61, 77.21 (d,  $J = 31.63$  Hz), 100.52 (d,  $J = 206.19$  Hz), 128.94, 129.03, 129.49, 129.51, 132.43, 164.45 (d,  $J = 25.64$  Hz), 201.20 (d,  $J = 28.91$  Hz); HRMS (IT-TOF)  $m/z$  calcd for  $\text{C}_{14}\text{H}_{16}\text{FNO}_5$   $[\text{M}+\text{Na}]^+ = 320.0910$ , found = 320.0551; The ee values of major and minor diastereomers were 91% and 90%, respectively (the major and minor isomers were separated by column, and only the HPLC chromatogram of the major isomer is shown below (Chiralcel OD-H,  $\lambda = 220$  nm, 10% *i*PrOH/hexane, flow rate = 0.50 mL/min,  $t_R$  (major) = 24.7 min, 46.3 min).

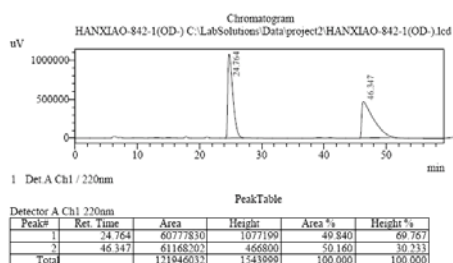

### Racemic **3e**

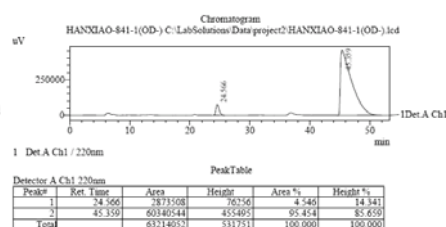

### Enantiomeric enriched **3e**

**(2S, 3R)-Ethyl 2-benzoyl-2-fluoro-4-nitro-3-phenylbutanoate 3f**

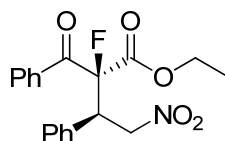

A white solid;  $^1\text{H}$  NMR (300 MHz,  $\text{CDCl}_3$ )  $\delta$  1.25-1.30 (t, 3.0H), 4.27-4.38 (m, 2H), 4.73-4.94 (m, 3H), 7.22-7.36 (m, 7H), 7.48-7.51 (m, 1H), 7.69-7.75 (d, 1H);  $^{13}\text{C}$  NMR (75 MHz,  $\text{CDCl}_3$ )  $\delta$  13.77, 47.84 (d,  $J = 19.09$  Hz), 63.85, 75.70 (d,  $J = 4.91$  Hz), 100.73 (d,  $J = 206.73$  Hz), 128.42, 128.70, 128.91, 129.18, 129.64, 133.19, 133.69, 134.07, 165.49 (d,  $J = 26.18$  Hz), 191.70 (d,  $J = 25.64$  Hz); HRMS (IT-TOF)  $m/z$  calcd for  $\text{C}_{19}\text{H}_{18}\text{FNO}_5$   $[\text{M}+\text{Na}]^+ = 382.1067$ , found = 382.0630; The ee value of the major diastereomer was 97% (Chiralcel IA,  $\lambda = 254$  nm, 5% *i*PrOH/hexane, flow rate = 0.50 mL/min,  $t_{\text{R}}$  (major) = 22.2 min, 31.6 min).

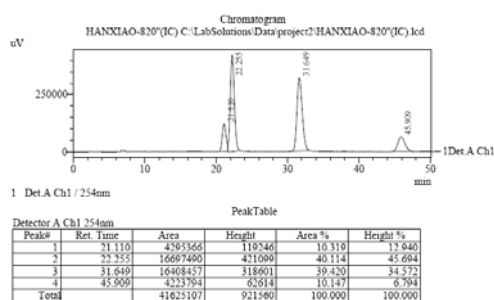

Racemic **3f**

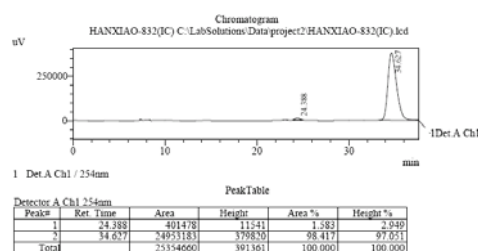

Enantiomerically enriched **3f**

**(2S, 3R)-Ethyl 2-benzoyl-2-fluoro-3-(4-fluorophenyl)-4-nitrobutanoate 5a**

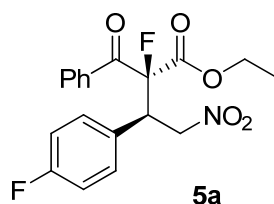

A white solid;  $^1\text{H}$  NMR (300 MHz,  $\text{CDCl}_3$ )  $\delta$  0.97-1.02 (t, 3.0H), 4.29-4.39 (m, 2H), 4.73-4.80 (m, 0.6H), 4.85-4.87 (m, 2.4H), 6.91-6.97 (t, 2H), 7.28-7.39 (m, 4H), 7.51-7.56 (t, 1H), 7.69-7.79 (d, 2H);  $^{13}\text{C}$  NMR (75 MHz,  $\text{CDCl}_3$ )  $\delta$  13.86, 47.19 (d,  $J = 19.09$  Hz), 63.83, 75.75 (d,  $J = 4.91$  Hz), 100.74 (d,  $J = 207.29$  Hz), 115.76 (d,  $J = 21.27$  Hz), 128.50, 128.98, 129.03, 129.20, 129.29, 131.49, 131.52, 131.63, 133.97, 161.03, 164.32, 165.42 (d,  $J = 25.64$  Hz), 191.55 (d,  $J = 25.64$  Hz); HRMS (IT-TOF)  $m/z$  calcd for  $\text{C}_{19}\text{H}_{17}\text{F}_2\text{NO}_5$   $[\text{M}+\text{Na}]^+ = 400.0927$ , found = 400.0873; The

ee value of the major diastereomer was 98% (Chiralcel IA,  $\lambda = 254$  nm, 5% *i*PrOH/hexane, flow rate = 0.50 mL/min,  $t_R$  (major) = 22.4 min, 34.6 min).

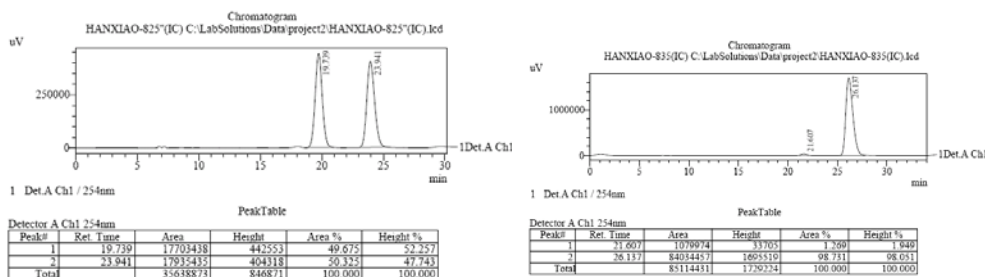

Racemic **5a**

Enantiomeric enriched **5a**

(2*S*, 3*R*)-Ethyl 2-benzoyl-3-(3-bromophenyl)-2-fluoro-4-nitrobutanoate **5b**

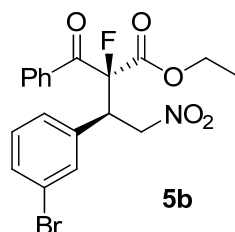

A yellow oil;  $^1\text{H}$  NMR (300 MHz,  $\text{CDCl}_3$ )  $\delta$  1.25-1.30 (t, 3.0H), 4.28-4.38 (m, 2H), 4.69-4.93 (m, 3H), 7.19-7.05 (t, 1H), 7.28-7.57 (m, 6H), 7.73-7.74 (d, 2H);  $^{13}\text{C}$  NMR (125 MHz,  $\text{CDCl}_3$ )  $\delta$  13.84, 47.43 (d,  $J = 19.13\text{Hz}$ ), 63.83, 75.52 (d,  $J = 4.55\text{ Hz}$ ), 100.48 (d,  $J = 207.69\text{ Hz}$ ), 122.73, 128.46, 129.35, 130.23, 131.83, 132.74, 133.80, 134.07, 135.71, 165.33 (d,  $J = 25.50\text{ Hz}$ ), 191.17 (d,  $J = 25.51\text{ Hz}$ ); HRMS (IT-TOF)  $m/z$  calcd for  $\text{C}_{19}\text{H}_{17}\text{BrFNO}_5$   $[\text{M}]^+ = 437.0274$ , found = 437.1107; The ee value of the major diastereomer was 99% (Chiralcel OD-H,  $\lambda = 254$  nm, 5% *i*PrOH/hexane, flow rate = 0.50 mL/min,  $t_R$  (major) = 31.3 min, 58.1 min,  $t_R$  (minor) = 44.7 min, 69.1 min).

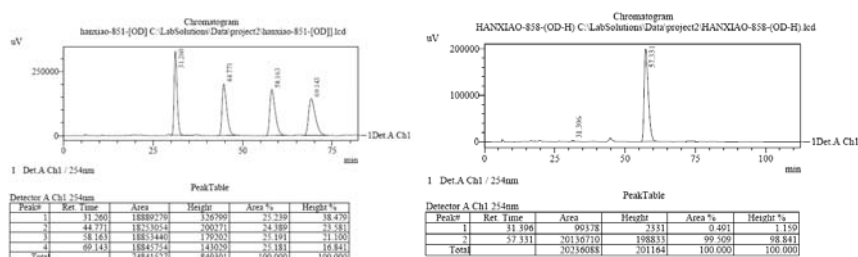

Racemic **5b**

Enantiomeric enriched **5b**

**(2*S*, 3*R*)-Ethyl 2-benzoyl-3-(4-bromophenyl)-2-fluoro-4-nitrobutanoate 5c**

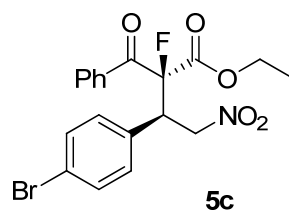

A yellow oil;  $^1\text{H}$  NMR (300 MHz,  $\text{CDCl}_3$ )  $\delta$  0.97-1.02 (t, 0.5H), 1.25-1.30 (t, 2.5H), 3.94-3.98 (m, 0.3H), 4.28-4.39 (m, 1.7H), 4.71-4.89 (m, 3H), 7.19-7.26 (m, 2H), 7.35-7.39 (m, 3.5H), 7.48-7.56 (m, 1.5H), 7.72-7.75 (d, 1.7H), 8.06-8.09 (d, 0.3H);  $^{13}\text{C}$  NMR (125 MHz,  $\text{CDCl}_3$ ) 13.85, 47.34 (d,  $J = 19.11$  Hz), 63.89, 75.57 (d,  $J = 5.47$  Hz), 100.57 (d,  $J = 206.77$  Hz), 122.93, 128.57, 129.32, 129.37, 131.43, 131.94, 132.44, 132.88, 133.85, 134.09, 165.38 (d,  $J = 25.51$  Hz), 191.20 (d,  $J = 25.51$  Hz); HRMS (IT-TOF)  $m/z$  calcd for  $\text{C}_{19}\text{H}_{17}\text{BrFNO}_5$   $[\text{M}]^+ = 437.0274$ , found = 437.1520; The ee value of the major diastereomer was 97% (Chiralcel OD-H,  $\lambda = 254$  nm, 5% *i*PrOH/hexane, flow rate = 0.50 mL/min,  $t_{\text{R}}$  (major) = 32.4 min, 85.8 min,  $t_{\text{R}}$  (minor) = 59.2 min, 68.9 min).

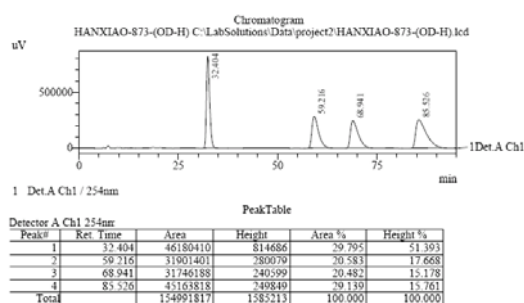

Racemic **5c**

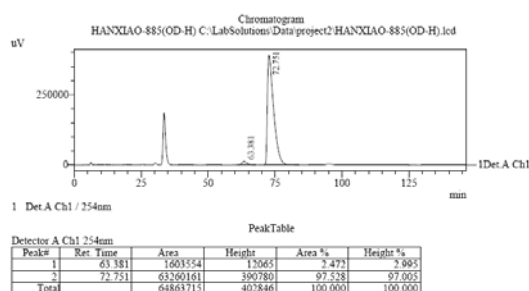

Enantiomeric enriched **5c**

**(2*S*, 3*R*)-Ethyl 2-benzoyl-3-(2-chlorophenyl)-2-fluoro-4-nitrobutanoate 5d**

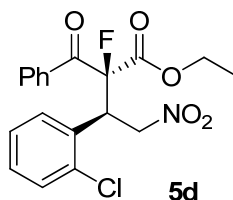

A colorless oil;  $^1\text{H}$  NMR (300 MHz,  $\text{CDCl}_3$ )  $\delta$  0.96-0.99 (t, 0.5H), 1.25-1.28 (t, 2.5H), 3.94-4.03 (m, 0.3H), 4.28-4.39 (m, 1.7H), 4.75-4.80 (m, 1H), 4.85-4.89 (m, 0.3H), 5.01-5.05 (m, 1H), 5.43-

5.51 (m, 1H), 7.11-7.747 (m, 9H);  $^{13}\text{C}$  NMR (125 MHz,  $\text{CDCl}_3$ )  $\delta$  13.77, 43.11 (d,  $J = 20.05$  Hz), 63.80, 75.32 (d,  $J = 6.37$  Hz), 100.33 (d,  $J = 206.78$  Hz), 127.25, 128.52, 129.31, 130.37, 132.53, 133.98, 134.68, 135.73, 165.51 (d,  $J = 25.50$  Hz), 191.88 (d,  $J = 25.51$  Hz); HRMS (IT-TOF)  $m/z$  calcd for  $\text{C}_{19}\text{H}_{17}\text{ClFNO}_5$   $[\text{M}+\text{Na}]^+ = 416.0677$ , found = 416.0265; The ee value of the major diastereomer was 99% (Chiralcel OD-H,  $\lambda = 254$  nm, 5% *i*PrOH/hexane, flow rate = 0.50 mL/min,  $t_R$  (major) = 33.1 min, 45.3 min,  $t_R$  (minor) = 37.9 min, 69.1 min).

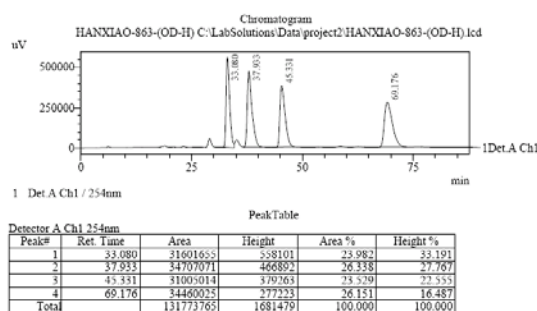

Racemic **5d**

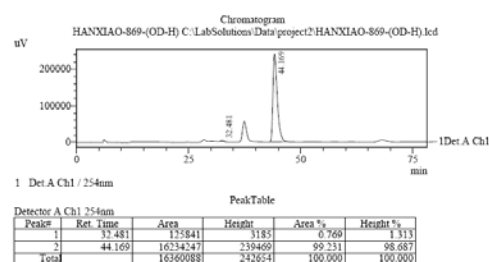

Enantiomeric enriched **5d**

(2*S*, 3*R*)-Ethyl 2-benzoyl-2-fluoro-4-nitro-3-*p*-tolylbutanoate **5e**

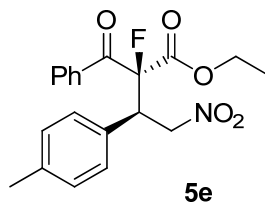

A colorless oil;  $^1\text{H}$  NMR (500 MHz,  $\text{CDCl}_3$ )  $\delta$  1.26-1.29 (t, 3H), 2.25 (s, 3H), 4.27-4.37 (m, 2H), 4.72-4.81 (m, 1H), 4.87-4.89 (m, 2H), 7.03-7.05 (d, 2H), 7.18-7.19 (d, 2H), 7.33-7.36 (m, 2H), 7.49-7.52 (m, 1H), 7.70-7.72 (d, 2H);  $^{13}\text{C}$  NMR (125 MHz,  $\text{CDCl}_3$ )  $\delta$  13.85, 21.04, 47.60 (d,  $J = 19.13$  Hz), 63.67, 75.90 (d,  $J = 4.56$  Hz), 100.82 (d,  $J = 205.86$  Hz), 128.61, 129.25, 129.37, 129.55, 130.15, 133.74, 134.20, 138.36, 165.67 (d,  $J = 26.43$  Hz), 191.69 (d,  $J = 25.50$  Hz); HRMS (IT-TOF)  $m/z$  calcd for  $\text{C}_{20}\text{H}_{20}\text{FNO}_5$   $[\text{M}+\text{Na}]^+ = 396.1223$ , found = 396.0783; The ee value of the major diastereomer was 96% (Chiralcel IC,  $\lambda = 210$  nm, 5% *i*PrOH/hexane, flow rate = 0.50 mL/min,  $t_R$  (major) = 23.0 min, 28.0 min,  $t_R$  (minor) = 21.7 min, 32.7 min).



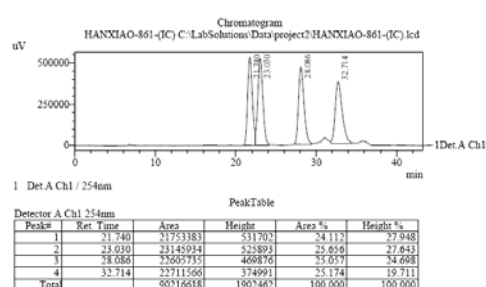

Racemic **5e**

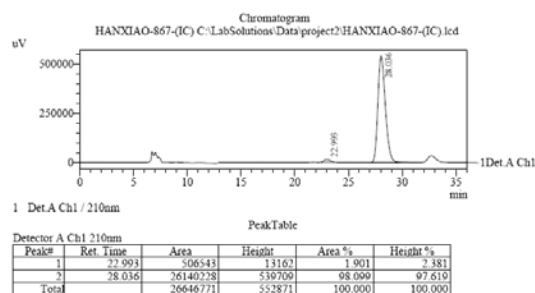

Enantiomeric enriched **5e**

(2*S*, 3*R*)-Ethyl 2-benzoyl-2-fluoro-3-(4-methoxyphenyl)-4-nitrobutanoate **5f**

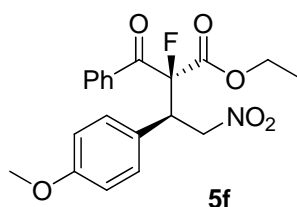

A yellow solid;  $^1\text{H}$  NMR (300 MHz,  $\text{CDCl}_3$ )  $\delta$  0.97-1.02 (t, 0.4H), 1.26-1.30 (t, 2.6H), 3.69 (s, 3H), 3.95-3.97 (m, 0.3H), 4.27-4.37 (m, 1.7H), 4.68-4.87 (m, 3H), 6.74-6.77 (t, 1.7H), 6.85-6.88 (d, 0.3H), 7.21-7.40 (m, 4H), 7.5-7.49 (m, 1H), 7.50-7.54 (m, 1.7H), 8.05-8.09 (d, 0.3H);  $^{13}\text{C}$  NMR (75 MHz,  $\text{CDCl}_3$ )  $\delta$  13.79, 47.21 (d,  $J = 19.08$  Hz), 55.08, 63.59, 75.85 (d,  $J = 4.9$  Hz), 100.82 (d,  $J = 206.19$  Hz), 114.10 (d,  $J = 9.82$  Hz), 124.87, 128.53, 129.20, 130.45, 133.67, 134.12, 159.51, 165.55 (d,  $J = 25.63$  Hz), 191.73 (d,  $J = 25.64$  Hz); HRMS (IT-TOF)  $m/z$  calcd for  $\text{C}_{20}\text{H}_{20}\text{FNO}_6$   $[\text{M}+\text{Na}]^+ = 412.1172$ , found = 412.0791; The ee value of the major diastereomer was 97% (Chiralcel IC,  $\lambda = 254$  nm, 7.5% *i*PrOH/hexane, flow rate = 0.50 mL/min,  $t_R$  (major) = 29.6 min, 32.7 min,  $t_R$  (minor) = 26.1 min, 34.7 min).

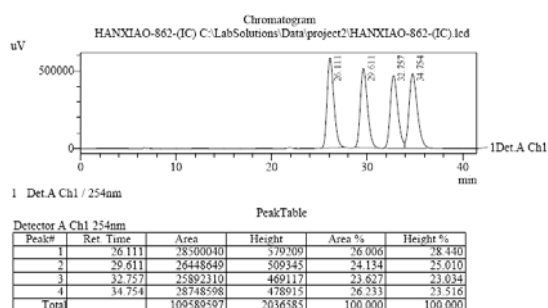

Racemic **5f**

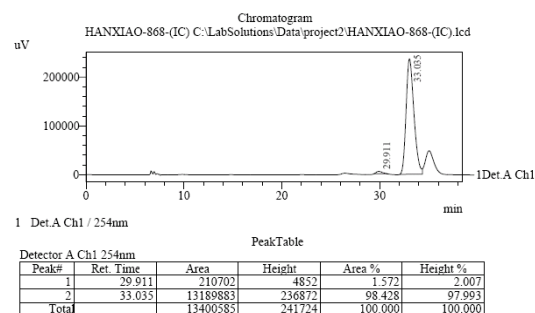

Enantiomeric enriched **5f**

**(2*S*, 3*R*)-Ethyl 2-benzoyl-2-fluoro-4-nitro-3-(2-(trifluoromethyl)phenyl)butanoate **5g****

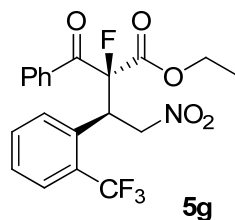

A colorless oil;  $^1\text{H}$  NMR (300 MHz,  $\text{CDCl}_3$ )  $\delta$  0.81-0.86 (t, 0.75H), 1.25-1.30 (t, 2.1H), 3.78-3.98 (m, 0.5H), 4.24-4.41 (m, 1.5H), 4.57-4.70 (m, 0.9H), 4.85-4.89 (m, 0.3H), 5.07-5.30 (m, 1.5H), 5.45-5.59 (m, 0.3H), 7.38-7.75 (m, 6H), 7.71-7.78 (m, 2.5H), 8.05-8.09 (d, 0.5H);  $^{13}\text{C}$  NMR (75 MHz,  $\text{CDCl}_3$ )  $\delta$  13.59, 42.72 (d,  $J = 17.46$  Hz), 63.87, 75.97 (d,  $J = 7.64$  Hz), 99.73 (d,  $J = 207.83$  Hz), 122.09, 125.72, 127.19, 128.50, 129.40, 130.03, 132.35, 134.41, 165.47 (d,  $J = 26.18$  Hz), 190.48 (d,  $J = 25.10$  Hz); HRMS (IT-TOF)  $m/z$  calcd for  $\text{C}_{20}\text{H}_{17}\text{F}_4\text{NO}_6$   $[\text{M}+\text{Na}]^+ = 450.0941$ , found = 450.0424; The ee value of the major diastereomer was 99% (Chiralcel OD-H,  $\lambda = 254$  nm, 7.5% *i*PrOH/hexane, flow rate = 0.50 mL/min,  $t_R$  (major) = 21.8 min, 25.3 min,  $t_R$  (minor) = 29.0 min, 46.0 min).

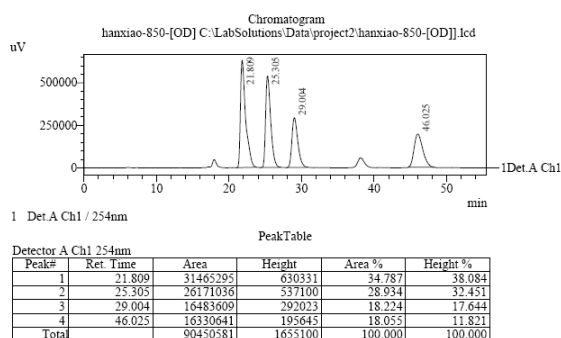

Racemic **5g**

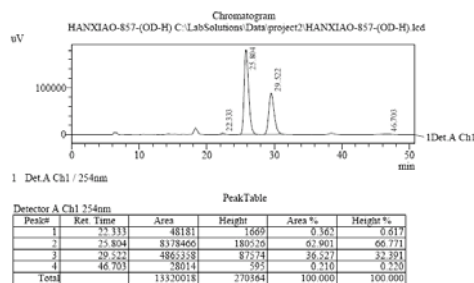

Enantiomerically enriched **5g**

**(2*S*, 3*R*)-Ethyl 2-benzoyl-3-(4-cyanophenyl)-2-fluoro-4-nitrobutanoate **5h****

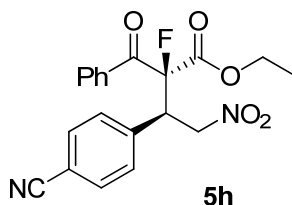

A yellow oil;  $^1\text{H}$  NMR (300 MHz,  $\text{CDCl}_3$ )  $\delta$  0.96-1.00 (t, 0.5H), 1.26-1.31 (t, 2.5H), 3.93-4.00

(m, 0.4H), 4.30-4.43 (m, 1.6H), 4.80-4.98 (m, 3H), 7.36-7.41 (m, 1.5H), 7.46-7.69 (m, 5.5H), 7.71-7.79 (m, 1.7H), 8.05-8.11 (d, 0.3H);  $^{13}\text{C}$  NMR (75 MHz,  $\text{CDCl}_3$ )  $\delta$  13.79, 42.54 (d,  $J = 19.08$  Hz), 63.03, 75.20 (d,  $J = 4.9$  Hz), 100.38 (d,  $J = 207.83$  Hz), 112.66, 118.02, 128.60, 129.30, 130.57, 132.42, 133.39, 134.32, 138.83, 165.03 (d,  $J = 25.64$  Hz), 190.64 (d,  $J = 25.08$  Hz); HRMS (IT-TOF)  $m/z$  calcd for  $\text{C}_{20}\text{H}_{17}\text{FN}_2\text{O}_5$   $[\text{M}+2\text{Na}]^+ = 430.0917$ , found = 430.8738; The ee value of the major diastereomer was 99% (Chiralcel OD-H,  $\lambda = 254$  nm, 20% *i*PrOH/hexane, flow rate = 0.50 mL/min,  $t_{\text{R}}$  (major) = 29.8 min, 69.7 min,  $t_{\text{R}}$  (minor) = 35.0 min, 104.5 min).

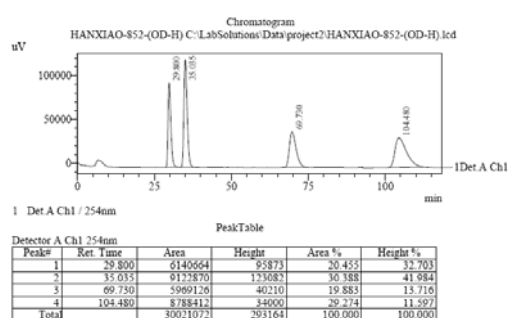

Racemic **5h**

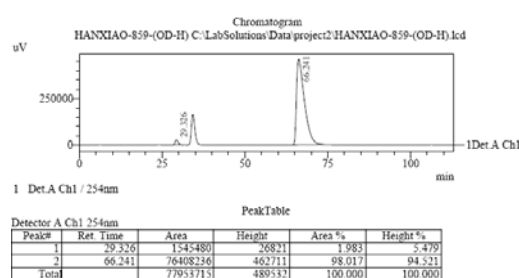

Enantiomeric enriched **5h**

(2*S*, 3*R*)-Ethyl 2-benzoyl-2-fluoro-3-(2-methoxyphenyl)-4-nitrobutanoate **5i**

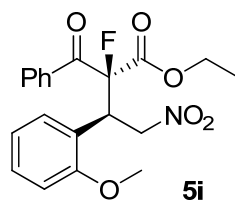

A yellow oil;  $^1\text{H}$  NMR (300 MHz,  $\text{CDCl}_3$ )  $\delta$  0.91-0.96 (t, 0.4H), 1.22-1.27 (t, 2.6H), 3.76 (s, 2.6H), 3.83 (s, 0.4H), 4.27-4.34 (m, 2H), 4.81-4.88 (m, 1H), 5.00-5.06 (m, 1H), 5.24-5.28 (m, 1H), 6.79-6.86 (m, 2H), 7.18-7.39 (m, 4H), 7.50-7.55 (m, 1H), 7.76-7.79 (d, 1.7H), 8.05-8.10 (d, 0.3H);  $^{13}\text{C}$  NMR (75 MHz,  $\text{CDCl}_3$ )  $\delta$  13.71, 40.97 (d,  $J = 20.18$  Hz), 55.58, 63.34, 75.34 (d,  $J = 6.0$  Hz), 100.10 (d,  $J = 205.67$  Hz), 111.14, 120.75, 122.56, 128.31, 129.20, 129.28, 129.34, 129.40, 129.63, 133.61, 133.96, 134.01, 157.41, 165.86 (d,  $J = 25.09$  Hz), 191.33 (d,  $J = 24.55$  Hz); HRMS (IT-TOF)  $m/z$  calcd for  $\text{C}_{20}\text{H}_{20}\text{FNO}_6$   $[\text{M}+\text{Na}]^+ = 412.1172$ , found = 412.0705; The ee value of the major diastereomer was 98% (Chiralcel OD-H,  $\lambda = 254$  nm, 5% *i*PrOH/hexane, flow rate = 0.50 mL/min,  $t_{\text{R}}$  (major) = 29.5 min, 35.5 min,  $t_{\text{R}}$  (minor) = 33.8 min, 39.9 min).

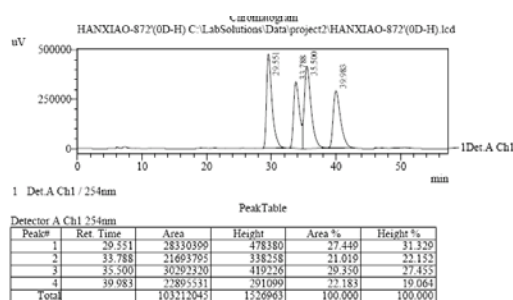

Racemic **5i**

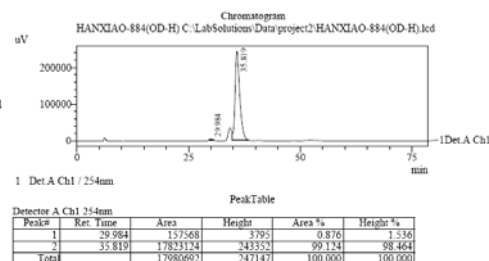

Enantiomeric enriched **5i**

**(2*S*, 3*R*)-Ethyl 2-benzoyl-2-fluoro-4-nitro-3-(thiophen-2-yl)butanoate **5j****

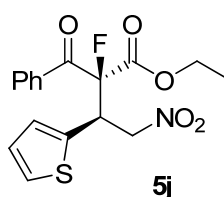

A colorless oil; <sup>1</sup>H NMR (500 MHz, CDCl<sub>3</sub>) δ 1.25-1.28 (t, 3H), 4.26-4.37 (m, 2H), 4.80-4.87 (m, 2H), 5.11-5.20 (m, 1H), 6.87-6.88 (m, 1H), 6.97-6.99 (m, 1H), 7.11-7.12 (m, 1H), 7.38-7.45 (m, 2H), 7.55-7.59 (m, 1H), 7.71-7.89 (d, 1H); <sup>13</sup>C NMR (125 MHz, CDCl<sub>3</sub>) δ 13.82, 43.88 (d, *J* = 20.05 Hz), 63.81, 76.51 (d, *J* = 3.6 Hz), 100.25 (d, *J* = 206.77 Hz), 126.70, 126.88, 128.52, 129.09, 1229.36, 129.41, 134.00, 134.47, 165.27 (d, *J* = 25.51 Hz), 191.18 (d, *J* = 24.6 Hz); HRMS (IT-TOF) *m/z* calcd for C<sub>17</sub>H<sub>16</sub>FNO<sub>5</sub>S [M]<sup>+</sup> = 365.0733, found = 365.1551; The ee value of the major diastereomer was 96% (Chiralcel OD-H, λ = 254 nm, 5% *i*PrOH/hexane, flow rate = 0.50 mL/min, *t<sub>R</sub>* (major) = 26.3 min, 51.9 min, *t<sub>R</sub>* (minor) = 42.5 min, 56.5 min).

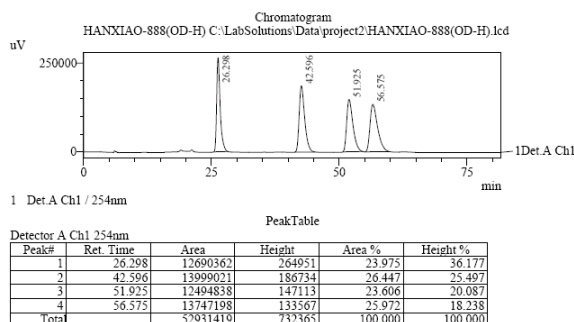

Racemic **5j**

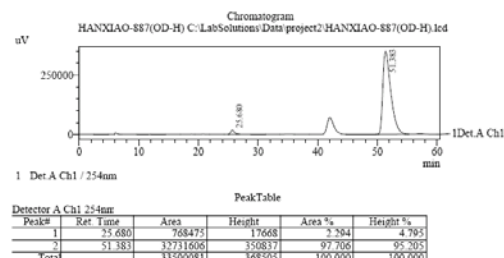

Enantiomeric enriched **5j**

(2*S*,3*R*)-Ethyl 2-benzoyl-2-fluoro-3-(nitromethyl)heptanoate **5k**

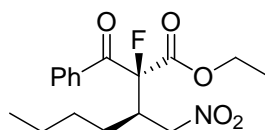

**5k**

A colorless oil;  $^1\text{H}$  NMR (500 MHz,  $\text{CDCl}_3$ )  $\delta$  0.86-0.89 (t, 3.0H), 1.21-1.24 (t, 3H), 1.27-1.47 (m, 5H), 1.56-1.61 (m, 1H), 3.51-3.62 (m, 1H), 4.23-4.39 (m, 2H), 4.41-4.43 (m, 1H), 4.66-4.70 (m, 1H), 7.45-7.49 (t, 2H), 7.59-7.60 (t, 1H), 8.00-8.02 (m, 2H);  $^{13}\text{C}$  NMR (125 MHz,  $\text{CDCl}_3$ )  $\delta$  13.73, 22.44, 28.23, 28.26, 29.18, 41.90, 42.07, 63.38, 74.81 (d,  $J = 2.74$  Hz), 100.96 (d,  $J = 203.14$  Hz), 128.70, 129.68, 129.74, 133.94, 133.97, 134.19, 166.02 (d,  $J = 25.51$  Hz), 191.66 (d,  $J = 24.6$  Hz); MS (ESI)  $m/z$   $\text{C}_{17}\text{H}_{22}\text{FNO}_5$   $[\text{M}+\text{Na}]^+ = 339.1$ ; The ee value for the major isomer was 97%,  $t_{\text{R}}$  (major) = 14.8 min,  $t_{\text{R}}$  (minor) = 11.8 min (Chiralcel OD-H,  $\lambda = 254$  nm, 5% *i*PrOH/hexanes, flow rate = 0.5 mL/min).

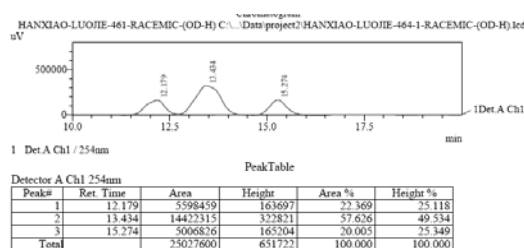

Racemic **5k**

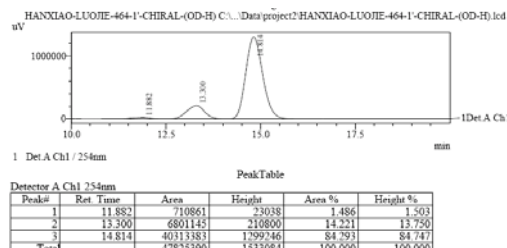

Enantiomeric enriched **5k**

(2*S*,3*R*)-Ethyl 2-benzoyl-2-fluoro-5-methyl-3-(nitromethyl)hexanoate **5l**

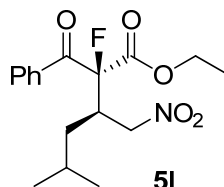

**5l**

A colorless oil;  $^1\text{H}$  NMR (500 MHz,  $\text{CDCl}_3$ )  $\delta$  0.94-0.96 (d, 2.6H), 0.97-0.99 (d, 0.8H), 1.01-1.02 (d, 2.6H), 1.24-1.26 (t, 3H), 1.32-1.46 (m, 2H), 1.63-1.70 (m, 1H), 3.62-3.72 (m, 1H), 4.23-4.38 (m, 2H), 4.31-4.41 (m, 1H), 4.67-4.77 (m, 1H), 7.43-7.49 (t, 2H), 7.55-7.65 (m, 1H), 7.94-8.05 (d, 2H);  $^{13}\text{C}$  NMR (125 MHz,  $\text{CDCl}_3$ )  $\delta$  13.71, 21.17, 23.46, 25.64, 37.49, 37.51, 40.19,

40.37, 63.37, 74.96, 74.98, 100.96 (d,  $J = 202.22$  Hz), 128.69, 129.67, 129.73, 133.98, 134.01, 134.17, 166.01 (d,  $J = 26.41$  Hz), 191.61 (d,  $J = 25.5$  Hz); MS (ESI)  $m/z$  for  $C_{17}H_{22}FNO_5$   $[M+Na]^+ = 339.1$ ; The ee value of the major isomer was 96%,  $t_R$  (major) = 15.2 min,  $t_R$  (minor) = 16.5 min (Chiralcel IC,  $\lambda = 254$  nm, 3% *i*PrOH/hexanes, flow rate = 0.5 mL/min)

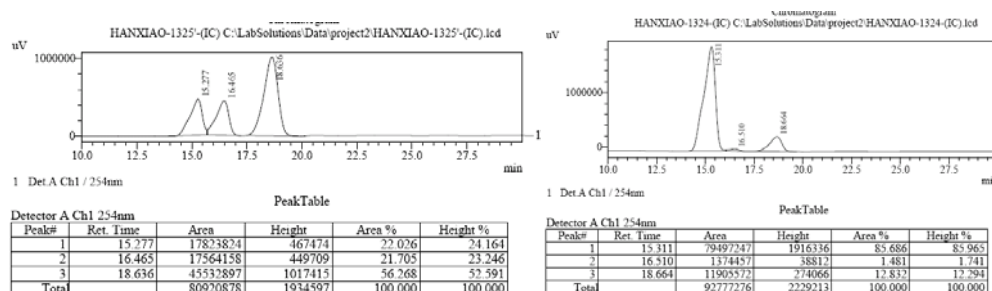

Racemic **51**

Enantiomeric enriched **51**

(2*S*, 3*R*)-Ethyl 2-fluoro-2-(4-methoxybenzoyl)-4-nitro-3-phenylbutanoate **7a**

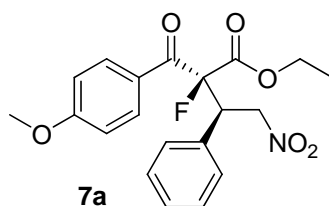

A white oil;  $^1H$  NMR (300 MHz,  $CDCl_3$ )  $\delta$  0.94-0.98 (t, 0.6H), 1.23-1.29 (t, 2.4H), 3.82 (s, 2.4H), 3.87 (s, 0.6H), 3.89-3.96 (m, 0.4H), 4.25-4.36 (m, 1.5H), 4.73-4.92 (m, 3H), 6.80-6.83 (d, 1.5H), 6.92-6.95 (d, 0.5H), 7.22-7.40 (m, 5H), 7.72-7.79 (d, 1.5H), 8.08-8.15 (d, 0.5H);  $^{13}C$  NMR (75 MHz,  $CDCl_3$ )  $\delta$  13.52, 13.75, 46.85 (d,  $J = 18.00$  Hz), 47.86 (d,  $J = 19.09$  Hz), 55.39, 55.51, 62.86, 63.45, 75.86 (d,  $J = 5.46$  Hz), 100.76 (d,  $J = 206.73$  Hz), 113.66, 114.00, 126.73, 126.77, 128.37, 128.58, 128.73, 128.79, 129.42, 129.45, 129.61, 129.64, 131.90, 132.00, 132.76, 134.49, 165.82 (d,  $J = 25.71$  Hz), 187.80 (d,  $J = 25.08$  Hz), 189.25 (d,  $J = 24.54$  Hz); HRMS (IT-TOF)  $m/z$  calcd for  $C_{20}H_{20}FNO_6$   $[M+H]^+ = 390.1353$ , found = 390.0976; The ee value of the major diastereomer was 97% (Chiralcel AD-H,  $\lambda = 254$  nm, 10% *i*PrOH/hexane, flow rate = 0.50 mL/min,  $t_R$  (major) = 25.7 min, 46.3 min,  $t_R$  (minor) = 29.2 min, 31.6 min).

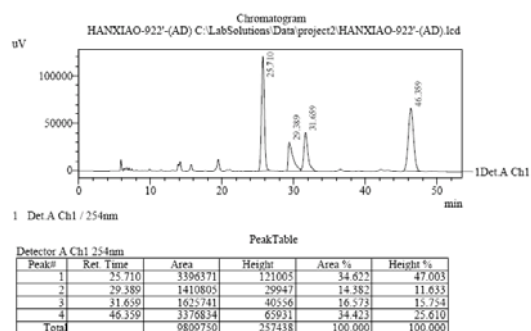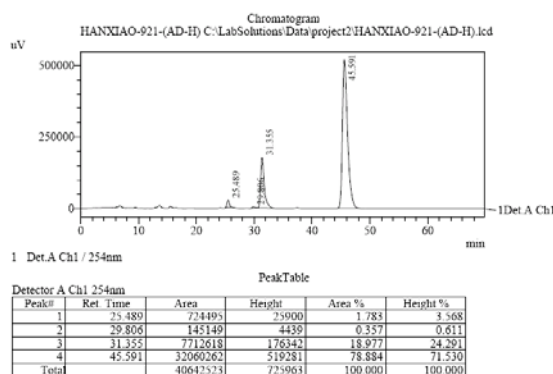

Racemic **7a**

Enantiomeric enriched **7a**

(2*S*, 3*R*)-Ethyl 2-(3-chlorobenzoyl)-2-fluoro-4-nitro-3-phenylbutanoate **7b**

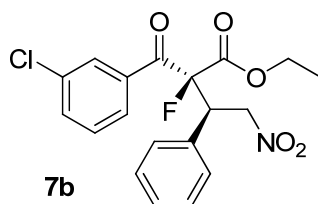

A colorless oil;  $^1\text{H NMR}$  (500 MHz,  $\text{CDCl}_3$ )  $\delta$  0.98-1.02 (t, 0.5H), 1.31-1.34 (t, 2.5H), 3.94-4.01 (m, 0.4H), 4.32-4.43 (m, 1.6H), 4.77-4.96 (m, 3H), 7.25-7.51 (m, 7H), 7.56-7.59 (d, 0.8H), 7.65 (s, 0.8H), 7.95-8.05 (d, 0.2H), 8.12 (s, 0.2H);  $^{13}\text{C NMR}$  (125 MHz,  $\text{CDCl}_3$ )  $\delta$  13.59, 13.85, 46.98 (d,  $J = 18.21$  Hz), 47.89 (d,  $J = 19.12$  Hz), 63.32, 63.92, 75.57 (d,  $J = 4.56$  Hz), 100.96 (d,  $J = 206.79$  Hz), 127.13, 127.21, 127.27, 128.76, 128.86, 128.93, 129.09, 129.12, 129.18, 129.29, 129.70, 130.16, 133.03, 133.68, 134.65, 134.69, 135.57, 165.16 (d,  $J = 25.51$  Hz), 191.13 (d,  $J = 26.42$  Hz); HRMS (IT-TOF)  $m/z$  calcd for  $\text{C}_{19}\text{H}_{17}\text{FCINO}_5$   $[\text{M}+2\text{Na}]^+$  = 439.0557, found = 439.0437; The ee value of the major diastereomer was 96% (Chiralcel OD-H,  $\lambda = 254$  nm, 5% *i*PrOH/hexane, flow rate = 0.50 mL/min,  $t_{\text{R}}$  (major) = 36.9 min, 54.1 min,  $t_{\text{R}}$  (minor) = 35.1 min, 42.5 min).

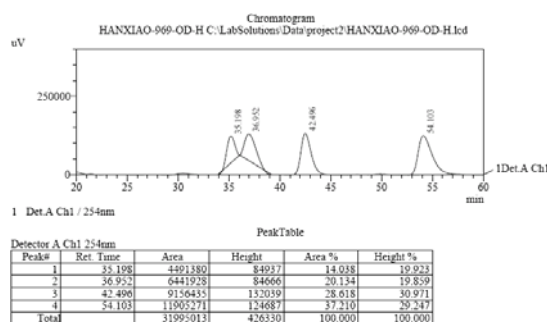

Racemic **7b**

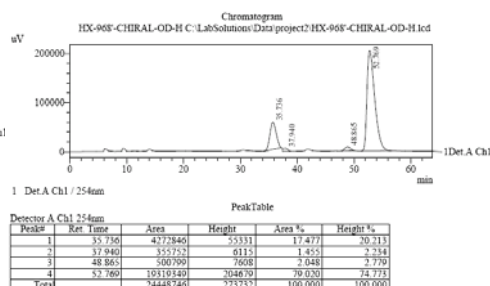

Enantiomeric enriched **7b**

(2*S*, 3*R*)-Ethyl 2-(3-chlorobenzoyl)-2-fluoro-3-(4-fluorophenyl)-4-nitrobutanoate **7c**

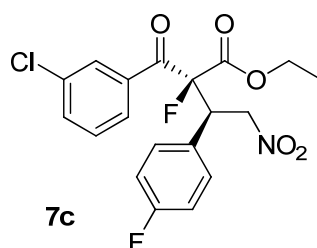

A colorless oil;  $^1\text{H}$  NMR (500 MHz,  $\text{CDCl}_3$ )  $\delta$  1.01-1.04 (t, 0.5H), 1.31-1.35 (t, 2.5H), 3.97-4.04 (m, 0.4H), 4.32-4.43 (m, 1.6H), 4.75-4.93 (m, 3H), 6.96-6.98 (m, 1.6H), 7.06-7.09 (m, 0.4H), 7.31-7.35 (m, 2.5H), 7.39-7.45 (m, 0.5H), 7.51-7.55 (d, 0.8H), 7.61-7.71 (m, 1H), 7.75 (s, 0.8H), 8.02-8.05 (d, 0.2H), 8.13 (s, 0.2H);  $^{13}\text{C}$  NMR (125 MHz,  $\text{CDCl}_3$ )  $\delta$  13.85, 46.26 (d,  $J = 18.21$  Hz), 47.15 (d,  $J = 19.12$  Hz), 63.43, 64.03, 75.59 (d,  $J = 5.46$  Hz), 101.00 (d,  $J = 206.77$  Hz), 115.80, 115.98, 127.28, 12.34, 129.21, 129.25, 129.84, 131.52, 131.54, 131.58, 131.60, 133.92, 134.82, 135.33, 135.36, 161.78, 164.93, 165.03 (d,  $J = 25.51$  Hz), 190.72 (d,  $J = 26.42$  Hz); HRMS (IT-TOF)  $m/z$  calcd for  $\text{C}_{19}\text{H}_{16}\text{F}_2\text{ClNO}_5$   $[\text{M}-\text{O}]^+ = 395.0736$ , found = 395.2298; The ee value of the major diastereomer was 96% (Chiralcel OD-H,  $\lambda = 254$  nm, 5% *i*PrOH/hexane, flow rate = 0.50 mL/min,  $t_{\text{R}}$  (major) = 27.7 min, 69.7 min,  $t_{\text{R}}$  (minor) = 29.1 min, 41.5 min).



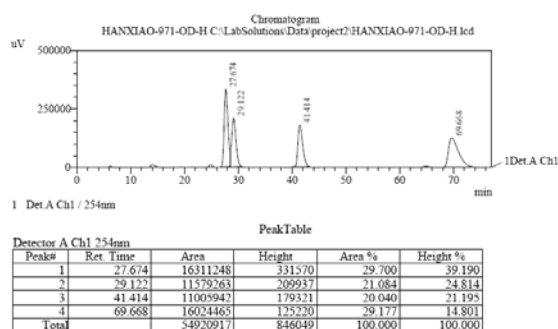

Racemic **7c**

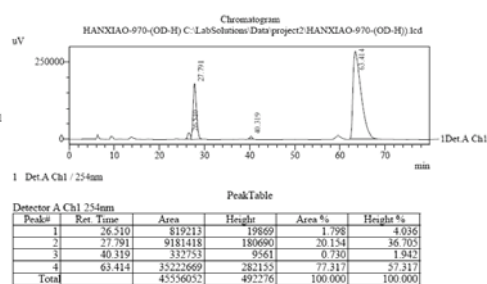

Enantiomeric enriched **7c**

(2*S*, 3*R*)-Ethyl 2-fluoro-4-nitro-2-(4-nitrobenzoyl)-3-phenylbutanoate **7d**

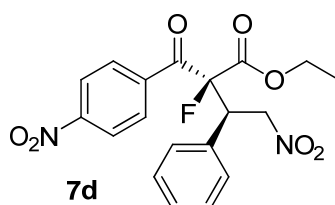

A white solid;  $^1\text{H}$  NMR (500 MHz,  $\text{CDCl}_3$ )  $\delta$  0.95-0.98 (t, 0.7H), 1.31-1.35 (t, 2.3H), 3.93-3.98 (m, 0.5H), 4.34-4.42 (m, 1.5H), 4.76-4.95 (m, 3H), 7.25-7.29 (m, 4H), 7.35-7.38 (m, 1H), 7.67-7.68 (d, 1.5H), 8.10-8.15 (d, 1.5H), 8.20-8.23 (d, 0.5H), 8.31-8.35 (d, 0.5H);  $^{13}\text{C}$  NMR (125 MHz,  $\text{CDCl}_3$ )  $\delta$  13.60, 13.90, 46.98 (d,  $J = 17.31$  Hz), 47.91 (d,  $J = 18.22$  Hz), 63.61, 64.22, 75.31 (d,  $J = 5.46$  Hz), 75.51 (d,  $J = 7.29$  Hz), 101.25 (d,  $J = 206.78$  Hz), 123.43, 123.90, 129.02, 129.25, 129.36, 129.38, 129.73, 129.74, 129.99, 130.05, 131.21, 131.26, 132.69, 132.71, 137.50, 137.53, 139.01, 139.04, 150.27, 150.97, 164.29 (d,  $J = 25.51$  Hz), 164.67 (d,  $J = 25.50$  Hz), 192.22 (d,  $J = 27.34$  Hz); HRMS (IT-TOF)  $m/z$  calcd for  $\text{C}_{19}\text{H}_{17}\text{FN}_2\text{O}_7$   $[\text{M}+\text{Na}]^+ = 427.0917$ , found = 427.2564; The ee value of the major diastereomer was 97% (Chiralcel AD-H,  $\lambda = 254$  nm, 10% *i*PrOH/hexane, flow rate = 0.50 mL/min,  $t_{\text{R}}$  (major) = 29.3 min, 31.1 min,  $t_{\text{R}}$  (minor) = 33.1 min, 39.3 min).

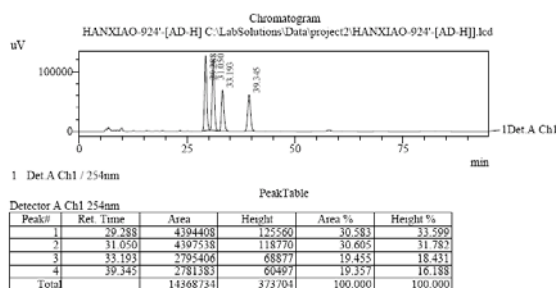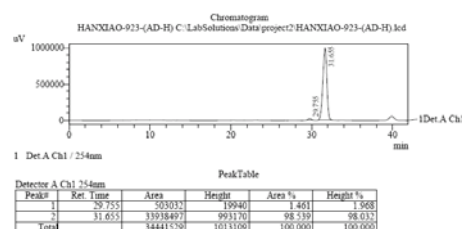

Racemic **7d**

Enantiomeric enriched **7d**

(2*S*, 3*R*)-Ethyl 2-fluoro-4-nitro-2-(4-nitrobenzoyl)-3-*p*-tolylbutanoate **7e**

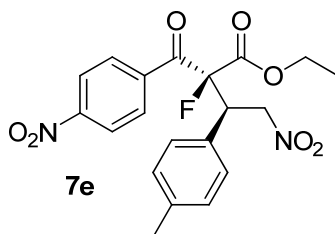

A yellow solid;  $^1\text{H}$  NMR (500 MHz,  $\text{CDCl}_3$ )  $\delta$  0.98-1.01 (t, 0.6H), 1.31-1.34 (t, 2.4H), 2.26 (s, 2.3H), 2.33 (s, 0.7), 3.95-3.99 (m, 0.4H), 4.32-4.42 (m, 1.6H), 4.72-4.92 (m, 3H), 7.04-7.05 (d, 1.5H), 7.14-7.16 (m, 2H), 7.25-7.27 (m, 0.8H), 7.71-7.77 (m, 1.5H), 8.14-8.19 (d, 1.5H), 8.21-8.25 (d, 0.4H), 8.31-8.35 (d, 0.4H);  $^{13}\text{C}$  NMR (125 MHz,  $\text{CDCl}_3$ )  $\delta$  13.90, 21.05, 47.59 (d,  $J = 18.22$  Hz), 64.14, 75.43 (d,  $J = 5.46$  Hz), 101.28 (d,  $J = 206.78$  Hz), 123.40, 123.87, 129.19, 129.56, 129.70, 130.07, 131.21, 138.85, 150.27, 164.75 (d,  $J = 25.51$  Hz), 192.12 (d,  $J = 27.33$  Hz); HRMS (IT-TOF)  $m/z$  calcd for  $\text{C}_{20}\text{H}_{19}\text{FN}_2\text{O}_7$   $[\text{M}]^+$  = 418.1176, found = 418.1648; The ee value of the major diastereomer was 96% (Chiralcel IC,  $\lambda = 254$  nm, 10% *i*PrOH/hexane, flow rate = 0.50 mL/min,  $t_{\text{R}}$  (major) = 50.0 min, 63.9 min,  $t_{\text{R}}$  (minor) = 60.1 min, 114.5 min).

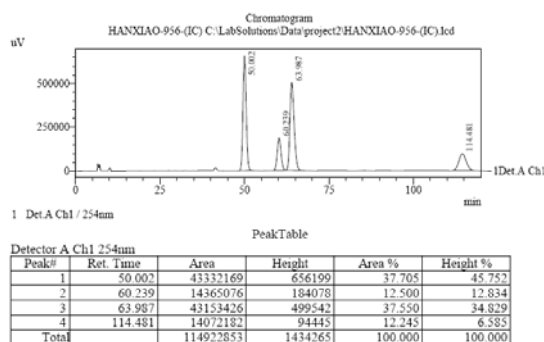

Racemic **7e**

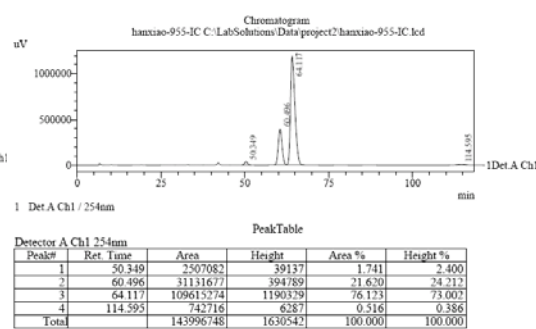

Enantiomeric enriched **7e**

(2*S*, 3*R*)-Ethyl 3-(3-bromophenyl)-2-fluoro-4-nitro-2-(4-nitrobenzoyl)butanoate **7f**

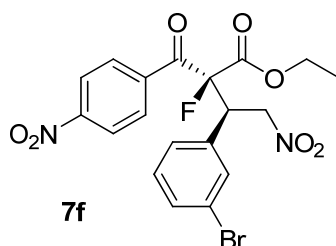

A yellow oil;  $^1\text{H}$  NMR (500 MHz,  $\text{CDCl}_3$ )  $\delta$  1.01-1.04 (t, 0.6H), 1.31-1.34 (t, 2.6H), 3.97-4.06 (m, 0.4H), 4.32-4.42 (m, 1.6H), 4.73-4.92 (m, 3H), 7.12-7.15 (m, 0.7H), 7.23-7.26 (m, 1.3H), 7.34-7.54 (m, 2H), 7.80-7.85 (d, 1.6H), 8.18-8.22 (d, 1.6H), 8.25-8.29 (d, 0.4H), 8.32-8.35 (d, 0.4H);  $^{13}\text{C}$  NMR (125 MHz,  $\text{CDCl}_3$ )  $\delta$  13.89, 47.37 (d,  $J = 18.21$  Hz), 64.38, 75.10 (d,  $J = 4.56$  Hz), 100.92 (d,  $J = 207.70$  Hz), 122.97, 123.59, 123.94, 127.86, 128.37, 130.25, 130.54, 131.27, 132.16, 132.45, 132.71, 135.17, 138.60, 150.49, 164.49 (d,  $J = 25.50$  Hz), 192.32 (d,  $J = 27.33$  Hz); HRMS (IT-TOF)  $m/z$  calcd for  $\text{C}_{19}\text{H}_{16}\text{BrFN}_2\text{O}_7$   $[\text{M}+\text{Na}]^+ = 505.0023$ , found = 505.2551; The ee value of the major diastereomer was 97% (Chiralcel IC,  $\lambda = 254$  nm, 15% *i*PrOH/hexane, flow rate = 0.50 mL/min,  $t_R$  (major) = 22.1 min, 25.6 min,  $t_R$  (minor) = 28.5 min, 29.5 min).

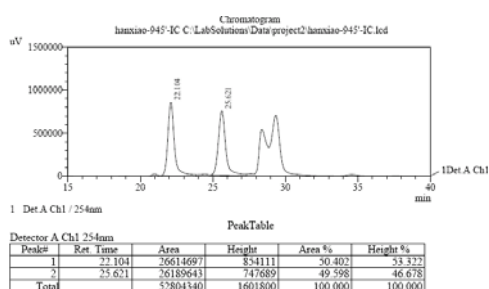

Racemic **7f**

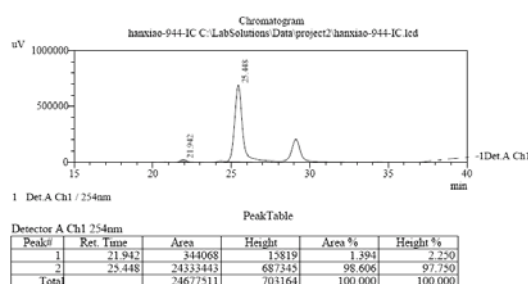

Enantiomeric enriched **7f**

(2*S*, 3*R*)-Ethyl 2-fluoro-4-nitro-3-phenyl-2-(4-(trifluoromethyl)benzoyl)butanoate **7g**

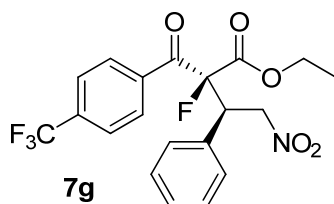

A colorless oil;  $^1\text{H}$  NMR (500 MHz,  $\text{CDCl}_3$ )  $\delta$  0.98-1.01 (t, 0.5H), 1.32-1.35 (t, 2.5H), 3.95-4.00 (m, 0.3H), 4.33-4.44 (m, 1.7H), 4.79-4.99 (m, 3H), 7.26-7.42 (m, 5H), 7.60-7.65 (d, 1.6H), 7.75-7.78 (d, 1.6H), 7.79-7.81 (d, 0.4H), 8.22-8.25 (d, 0.4H);  $^{13}\text{C}$  NMR (125 MHz,  $\text{CDCl}_3$ )  $\delta$  13.86, 47.91 (d,  $J = 18.21$  Hz), 64.02, 75.49 (d,  $J = 5.46$  Hz), 101.11 (d,  $J = 206.77$  Hz), 122.25,

124.38, 125.34, 125.37, 128.81, 128.91, 128.97, 129.14, 129.36, 129.43, 129.72, 129.73, 130.45, 139.49, 132.96, 135.75, 137.10, 164.94 (d,  $J = 25.51$  Hz), 192.04 (d,  $J = 27.33$  Hz); HRMS (IT-TOF)  $m/z$  calcd for  $C_{20}H_{17}F_4NO_5 [M]^+$  = 427.1043, found = 430.8768; The ee value of the major diastereomer was 95% (Chiralcel AD-H,  $\lambda = 254$  nm, 2% *i*PrOH/hexane, flow rate = 0.50 mL/min,  $t_R$  (major) = 30.6 min, 47.7 min,  $t_R$  (minor) = 38.9 min, 42.3 min).

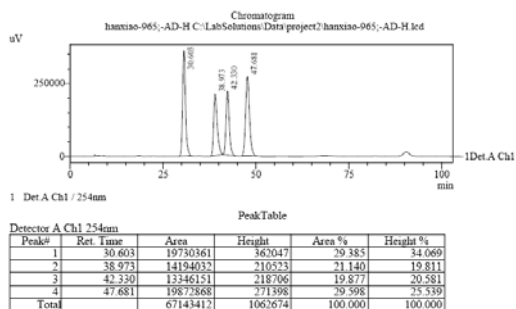

Racemic **7g**

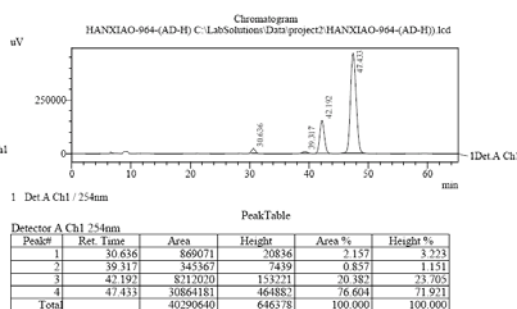

Enantiomerically enriched **7g**

(2*S*, 3*R*)-Ethyl 3-(2-chlorophenyl)-2-fluoro-4-nitro-2-(4-(trifluoromethyl)benzoyl)butanoate **7h**

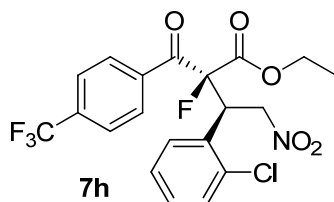

A colorless oil;  $^1H$  NMR (500 MHz,  $CDCl_3$ )  $\delta$  0.96-0.99 (t, 0.6H), 1.29-1.32 (t, 2.4H), 3.92-4.02 (m, 0.4H), 4.31-4.42 (m, 1.6H), 4.74-4.78 (m, 1H), 4.82-4.86 (m, 0.2H), 5.00-5.04 (m, 1H), 5.44-5.53 (m, 0.8H), 7.11-7.14 (m, 1H), 7.18-7.21 (m, 1H), 7.32-7.45 (m, 2H), 7.60-7.63 (d, 1.6H), 7.75-7.79 (d, 0.4H), 7.81-7.85 (d, 1.6H), 8.15-8.19 (d, 0.4H);  $^{13}C$  NMR (125 MHz,  $CDCl_3$ )  $\delta$  13.81, 43.08, 64.14, 75.09 (d,  $J = 6.37$  Hz), 100.63 (d,  $J = 207.69$  Hz), 122.21, 124.38, 125.50, 125.86, 127.37, 127.65, 129.55, 129.61, 129.69, 129.89, 130.26, 130.44, 130.48, 130.53, 132.17, 134.89, 135.16, 135.72, 136.70, 164.94 (d,  $J = 25.51$  Hz), 190.87 (d,  $J = 25.50$  Hz); HRMS (IT-TOF)  $m/z$  calcd for  $C_{20}H_{16}ClF_4NO_5 [M-Cl+H]^+$  = 427.1043, found = 427.0031; The ee value of the major diastereomer was 95% (Chiralcel IA,  $\lambda = 254$  nm, 5% *i*PrOH/hexane, flow rate = 0.50 mL/min,  $t_R$  (major) = 18.7 min, 21.5 min,  $t_R$  (minor) = 25.6 min, 32.6 min).

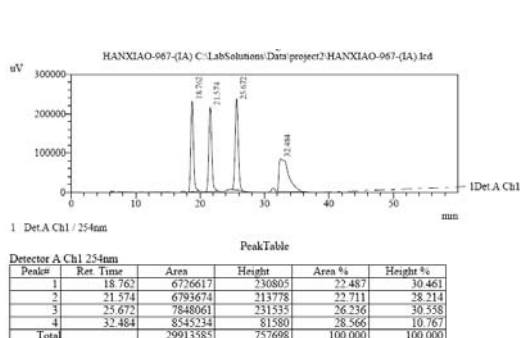

Racemic **7h**

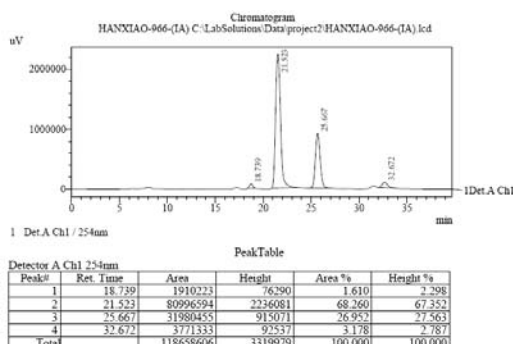

Enantiomeric enriched **7h**

(S)-Ethyl 2-((R)-1-(4-bromophenyl)-2-nitroethyl)-2-fluoro-4,4-dimethyl-3-oxopentanoate **7i**

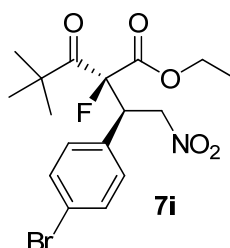

A white solid; <sup>1</sup>H NMR (500 MHz, CDCl<sub>3</sub>) δ 0.89-0.90 (s, 9H), 1.32-1.35 (t, 3H), 4.29-4.36 (m, 2H), 4.60-4.64 (m, 0.5H), 4.67-4.78 (m, 1.5H), 4.80-4.83 (m, 1H), 7.16-7.18 (m, 2H), 7.43-7.44 (m, 2H); <sup>13</sup>C NMR (125 MHz, CDCl<sub>3</sub>) δ 13.94, 25.46 (d, *J* = 4.55 Hz), 45.58 (d, *J* = 3.64 Hz), 47.71 (d, *J* = 18.21 Hz), 63.65, 74.91 (d, *J* = 4.56 Hz), 102.32 (d, *J* = 211.10 Hz), 123.07, 131.70, 131.72, 131.88, 132.24, 164.81 (d, *J* = 25.51 Hz), 204.79 (d, *J* = 24.60 Hz); HRMS (IT-TOF) *m/z* calcd for C<sub>17</sub>H<sub>21</sub>BrFNO<sub>5</sub> [M+H]<sup>+</sup> = 417.0587, found = 418.1651; The ee value of the major diastereomer was 97% (Chiralcel OD-H, λ = 210 nm, 5% *i*PrOH/hexane, flow rate = 0.50 mL/min, *t<sub>R</sub>* (major) = 39.2 min, 56.7 min).

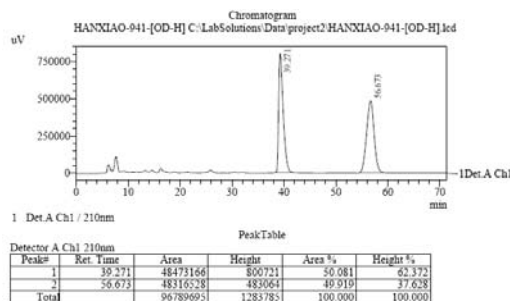

Racemic **7i**

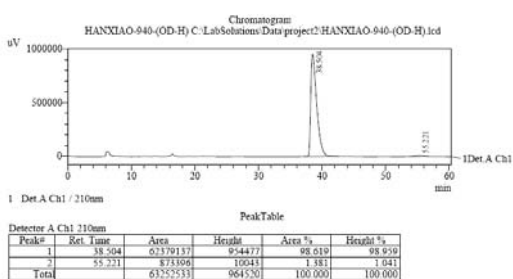

Enantiomeric enriched **7i**

(S)-Ethyl 2-fluoro-2-((R)-1-(4-methoxyphenyl)-2-nitroethyl)-4,4-dimethyl-3-oxopentanoate 7j

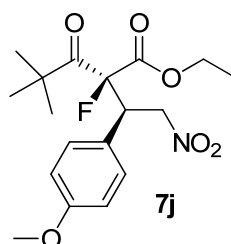

A yellow oil;  $^1\text{H}$  NMR (300 MHz,  $\text{CDCl}_3$ )  $\delta$  0.87-0.88 (d, 9H), 1.31-1.36 (t, 3H), 3.76 (s, 3H), 4.28-4.36 (m, 2H), 4.50-4.87 (m, 3H), 6.79-6.84 (m, 2H), 7.18-7.21 (m, 2H);  $^{13}\text{C}$  NMR (125 MHz,  $\text{CDCl}_3$ )  $\delta$  13.95, 25.46 (d,  $J = 4.55$  Hz), 45.64 (d,  $J = 3.67$  Hz), 47.71 (d,  $J = 19.12$  Hz), 55.22, 63.44, 75.29 (d,  $J = 4.56$  Hz), 102.52 (d,  $J = 211.10$  Hz), 114.03, 124.85, 131.23, 159.79, 165.13 (d,  $J = 25.51$  Hz), 205.06 (d,  $J = 24.58$  Hz); HRMS (IT-TOF)  $m/z$  calcd for  $\text{C}_{18}\text{H}_{24}\text{FNO}_6$   $[\text{M}+\text{H}]^+ = 392.1485$ , found = 392.1051; The ee value of the major diastereomer was 98% (Chiralcel OD-H,  $\lambda = 210$  nm, 5% *i*PrOH/hexane, flow rate = 0.50 mL/min,  $t_{\text{R}}$  (major) = 22.4 min, 38.1 min,  $t_{\text{R}}$  (minor) = 15.1 min, 20.3 min).

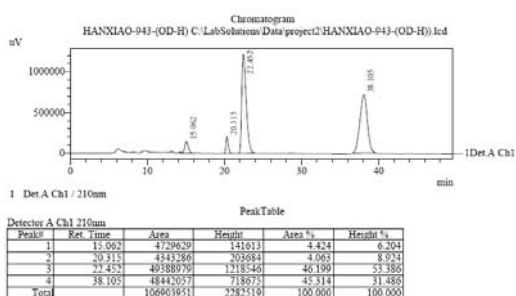

Racemic 7j

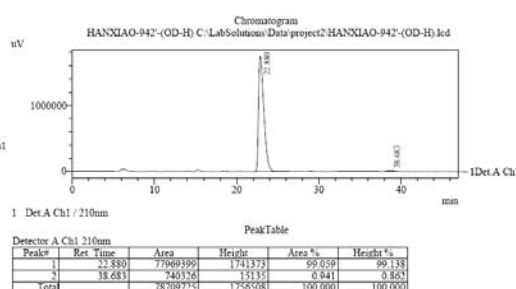

Enantiomeric enriched 7j

(2S,3R)-tert-Butyl 2-benzoyl-3-(2-chlorophenyl)-2-fluoro-4-nitrobutanoate 7k

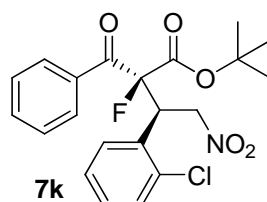

A colorless oil;  $^1\text{H}$  NMR (500 MHz,  $\text{CDCl}_3$ )  $\delta$  1.10 (s, 2.5H), 1.42 (s, 6.5H), 4.67-4.72 (m, 0.3H), 4.79-4.87 (m, 1 H), 4.99-5.03 (m, 0.8H), 5.39-5.47 (m, 0.7H), 5.63-5.70 (m, 0.3H), 7.12-7.20 (m,

1.5H), 7.27-7.41 (m, 5.5H), 7.75-7.79 (d, 1.5H), 8.10-8.15 (d, 0.5H);  $^{13}\text{C}$  NMR (125 MHz,  $\text{CDCl}_3$ )  $\delta$  27.08, 27.55, 43.02, 43.18, 75.80, 76.01, 85.59, 86.10, 100.24 (d,  $J = 206.77$  Hz), 127.21, 127.53, 128.47, 128.76, 128.90, 128.92, 128.94, 129.26, 129.31, 129.54, 129.93, 130.01, 130.11, 130.28, 131.93, 132.73, 133.15, 133.18, 133.99, 134.01, 134.47, 135.49, 135.94, 164.30 (d,  $J = 24.6$  Hz), 191.06 (d,  $J = 24.6$  Hz); MS (ESI)  $m/z$   $\text{C}_{21}\text{H}_{21}\text{FCINO}_5$   $[\text{M}+\text{Na}]^+ = 421.1$ ; The ee value of the major isomer was 98%,  $t_{\text{R}}$  (major) = 25.0 min,  $t_{\text{R}}$  (minor) = 23.7 min (Chiralcel OD-H,  $\lambda = 254$  nm, 2.5% *i*PrOH/hexanes, flow rate = 0.5 mL/min).

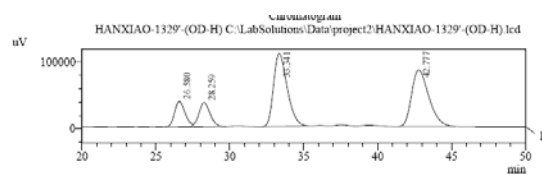

1 Det.A Ch1 / 254nm

PeakTable

| Peak# | Ret. Time | Area     | Height | Area %  | Height % |
|-------|-----------|----------|--------|---------|----------|
| 1     | 26.580    | 1898669  | 38140  | 10.787  | 14.261   |
| 2     | 28.259    | 1914648  | 36763  | 10.878  | 13.559   |
| 3     | 33.341    | 6978962  | 108611 | 39.651  | 40.611   |
| 4     | 42.777    | 6808894  | 84429  | 38.684  | 31.569   |
| Total |           | 17601173 | 267442 | 100.000 | 100.000  |

Racemic **7k**

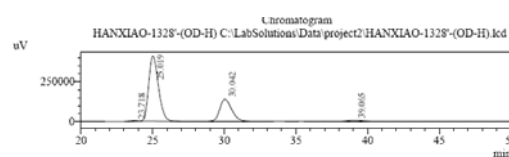

1 Det.A Ch1 / 254nm

PeakTable

| Peak# | Ret. Time | Area     | Height | Area %  | Height % |
|-------|-----------|----------|--------|---------|----------|
| 1     | 23.718    | 100931   | 3281   | 0.358   | 0.588    |
| 2     | 25.019    | 19305637 | 406604 | 68.384  | 72.873   |
| 3     | 30.042    | 8308435  | 140122 | 29.434  | 25.113   |
| 4     | 39.065    | 515152   | 7956   | 1.825   | 1.426    |
| Total |           | 28231155 | 557962 | 100.000 | 100.000  |

Enantiomeric enriched **7k**

## References:

- [1] J.-C. Xiao, J. M. Shreeve. *J. Fluorine Chem.* **2005**, *126*, 475.
- [2] T. Kitazume, T. Kobayashi, T. Yamamoto, T. Yamazaki. *J. Org. Chem.* **1987**, *52*, 3218.
- [3] a) J. A. Dale, H. S. Mosher, *J. Am. Chem. Soc.* **1973**, *95*, 512; b) I. Ohtani, T. Kusumi, Y. Kashman, H. Kakisawa, *J. Am. Chem. Soc.* **1991**, *113*, 4092.
- [4] T. Okino, Y. Hoashi, T. Furukawa, X. Xu, Y. Takemoto, *J. Am. Chem. Soc.* **2005**, *127*, 119.

## F. NMR Spectra of Products

<sup>1</sup>H normal range AC300 1036

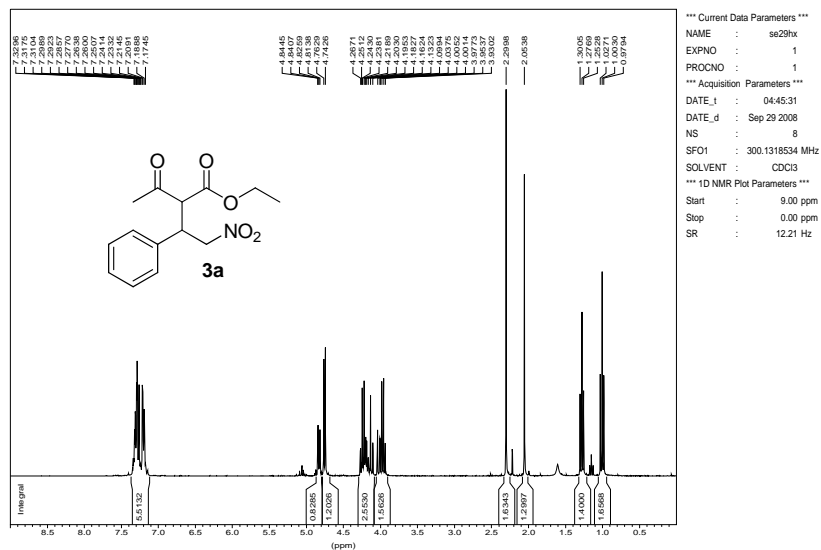

<sup>1</sup>H normal range AC300 1039

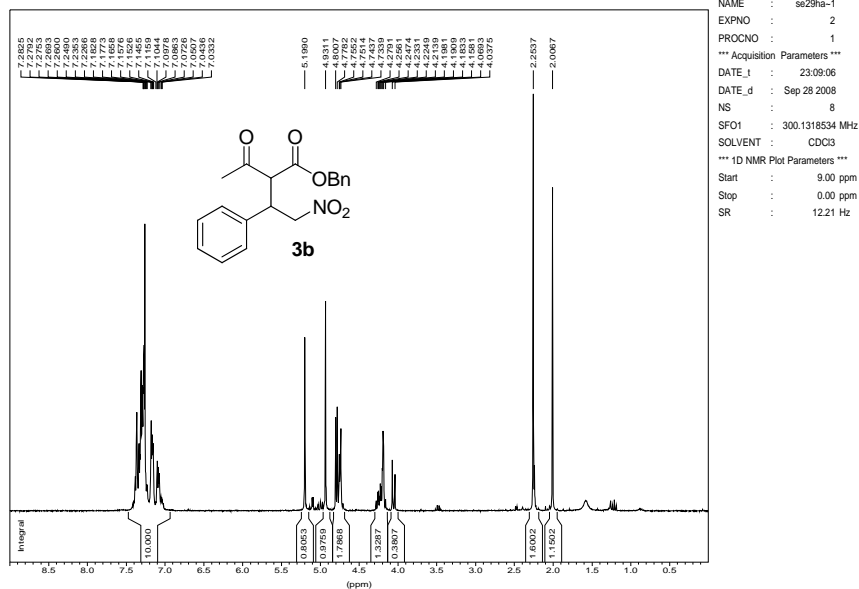



13C Standard AC300 1039

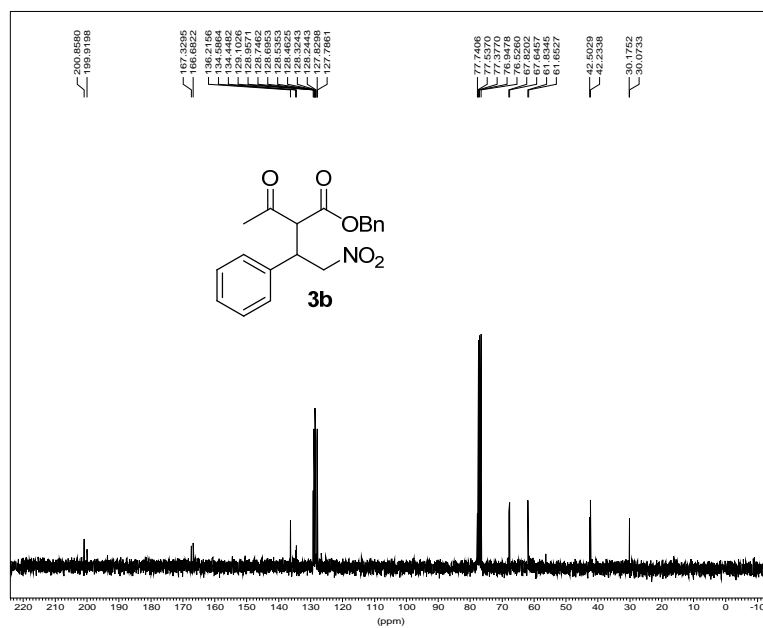

\*\*\* Current Data Parameters \*\*\*  
 NAME : se29hx  
 EXPNO : 3  
 PROCNO : 1  
 \*\*\* Acquisition Parameters \*\*\*  
 DATE\_t : 04:50:43  
 DATE\_d : Sep 29 2008  
 NS : 258  
 SFO1 : 75.4756731 MHz  
 SOLVENT : CDCl3  
 \*\*\* 1D NMR Plot Parameters \*\*\*  
 Start : 224.06 ppm  
 Stop : -14.26 ppm  
 SR : 7.70 Hz

1H normal range AC300 1038

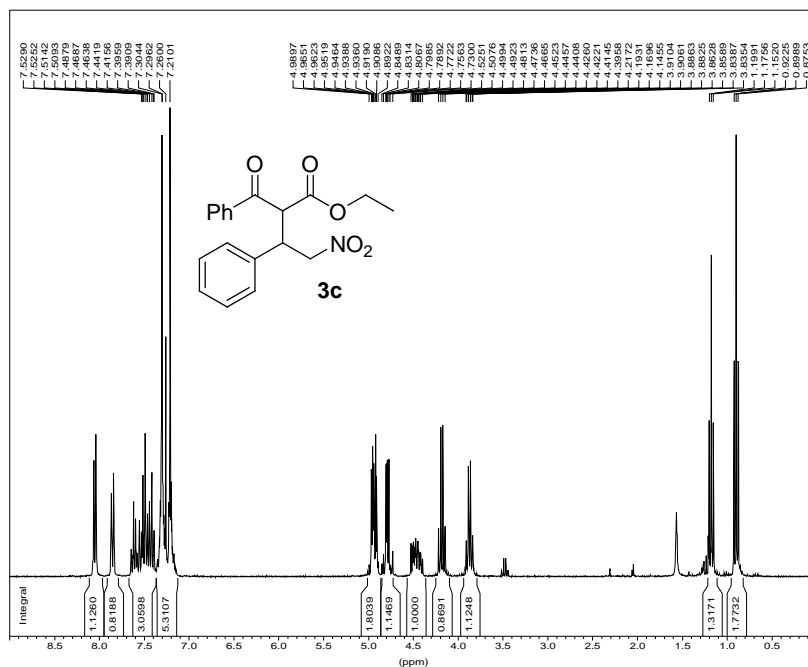

\*\*\* Current Data Parameters \*\*\*  
 NAME : se29h-1  
 EXPNO : 1  
 PROCNO : 1  
 \*\*\* Acquisition Parameters \*\*\*  
 DATE\_t : 23:06:12  
 DATE\_d : Sep 28 2008  
 NS : 8  
 SFO1 : 300.1318534 MHz  
 SOLVENT : CDCl3  
 \*\*\* 1D NMR Plot Parameters \*\*\*  
 Start : 9.00 ppm  
 Stop : 0.00 ppm  
 SR : 12.05 Hz

13C Standard AC300 1038

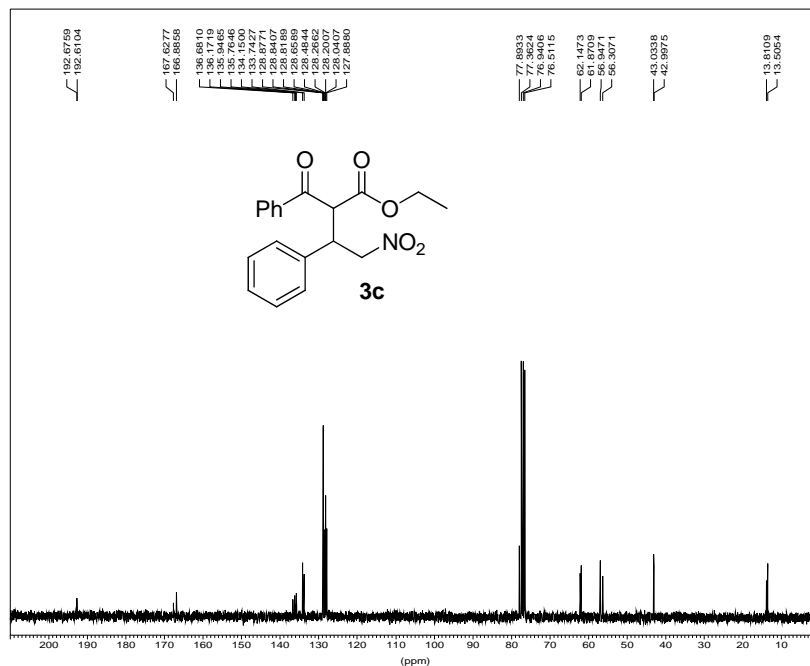

\*\*\* Current Data Parameters \*\*\*

NAME : se29hanx  
EXPNO : 3  
PROCNO : 1  
\*\*\* Acquisition Parameters \*\*\*  
DATE\_t : 07:23:32  
DATE\_d : Sep 29 2008  
NS : 637  
SFO1 : 75.4756731 MHz  
SOLVENT : CDCl3  
\*\*\* 1D NMR Plot Parameters \*\*\*  
Start : 210.00 ppm  
Stop : 0.01 ppm  
SR : 7.70 Hz

1H AMX500 1037

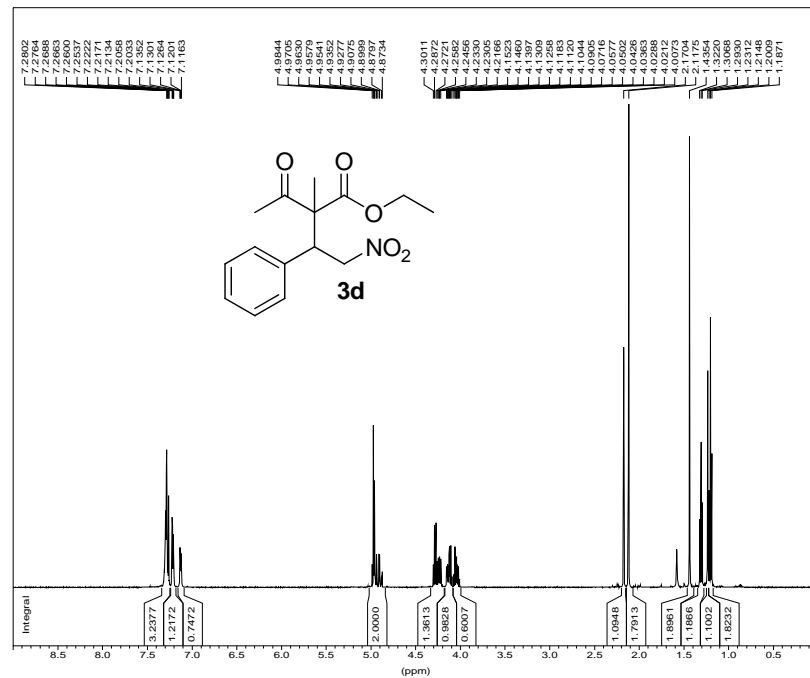

\*\*\* Current Data Parameters \*\*\*

NAME : hx0927  
EXPNO : 3  
PROCNO : 1  
\*\*\* Acquisition Parameters \*\*\*  
DATE\_t : 03:07:51  
DATE\_d : Sep 27 2008  
NS : 8  
SFO1 : 500.1330885 MHz  
SOLVENT : CDCl3  
\*\*\* 1D NMR Plot Parameters \*\*\*  
Start : 9.00 ppm  
Stop : 0.00 ppm  
SR : 13.69 Hz

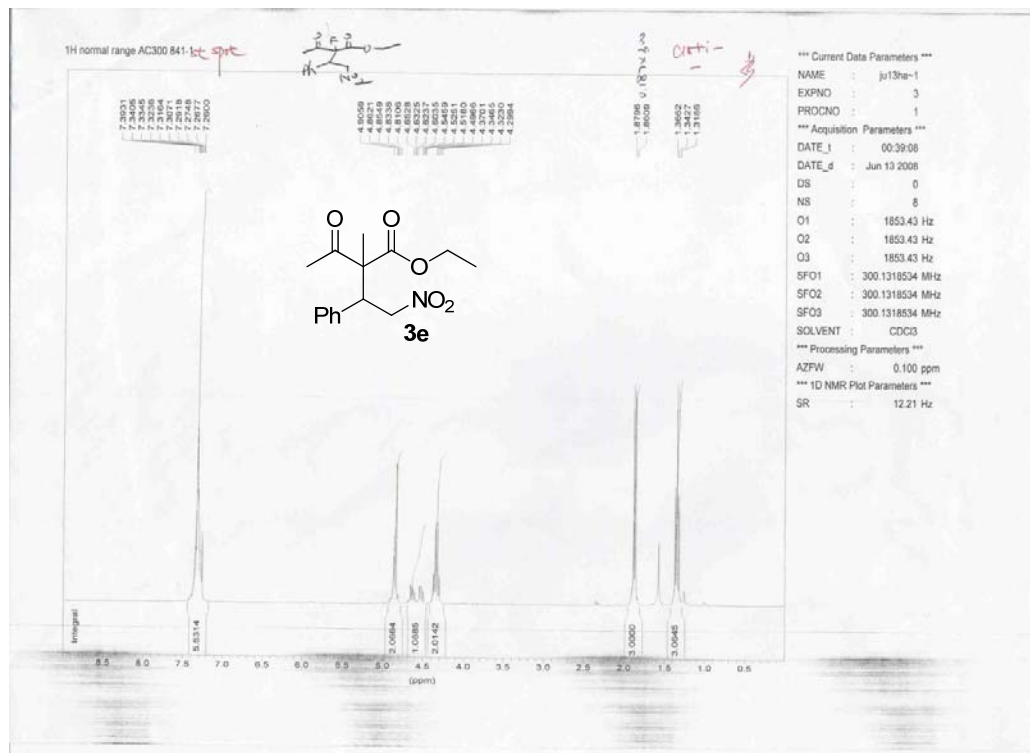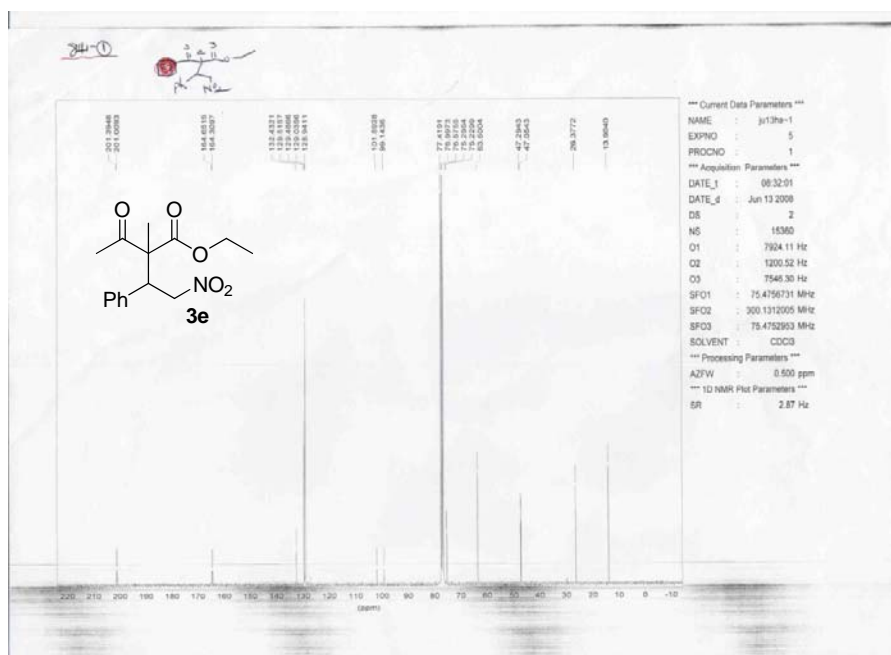

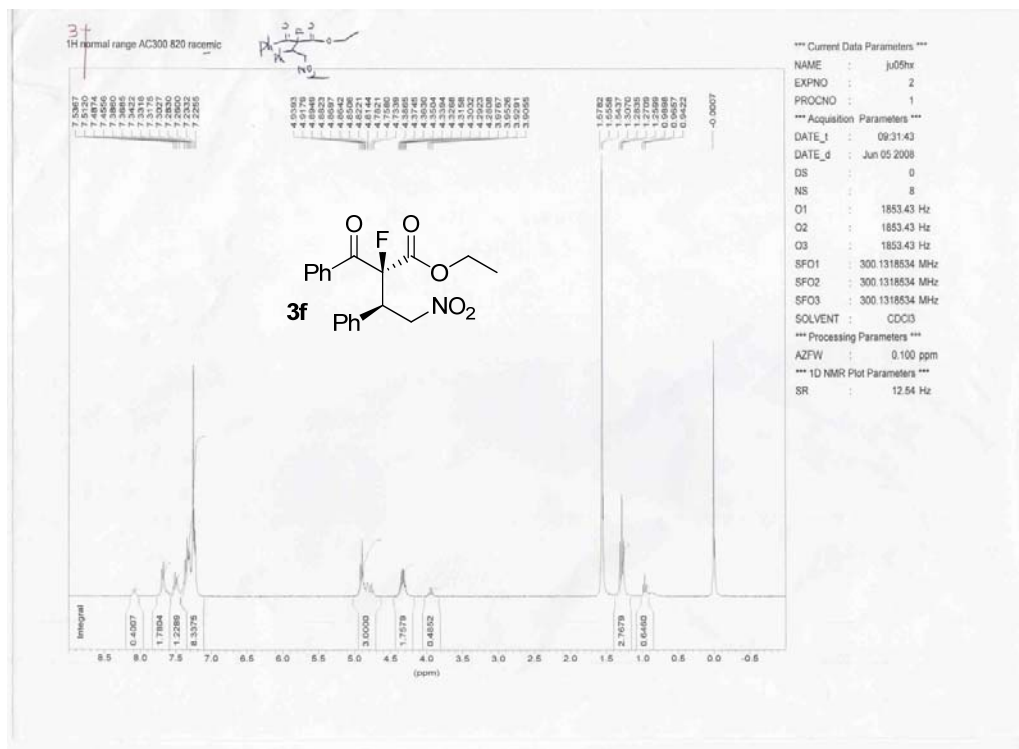

13C Standard AC300 818

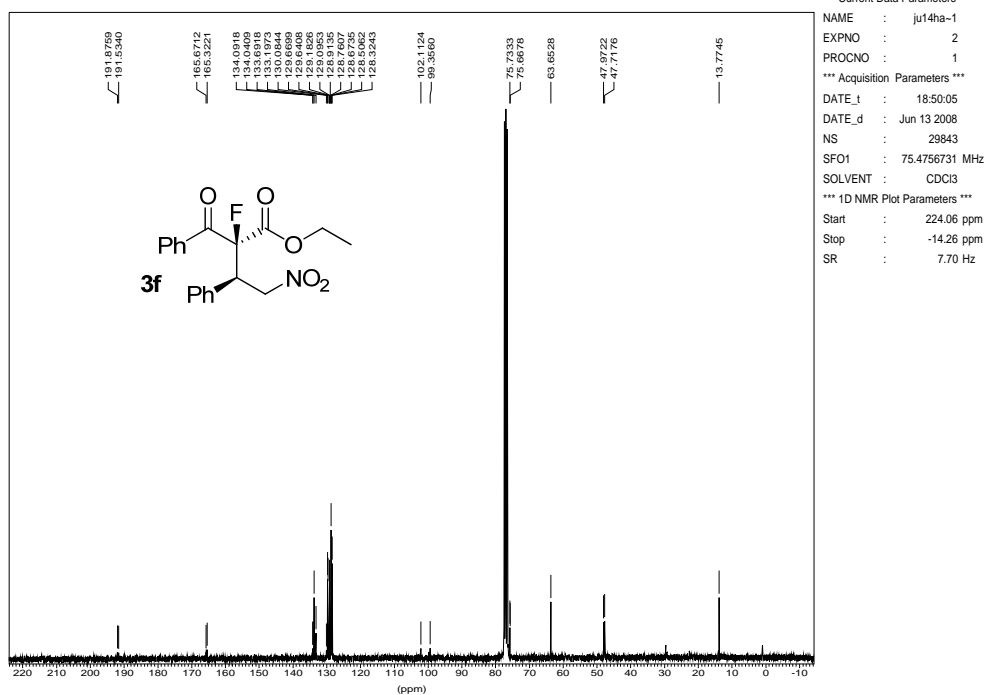

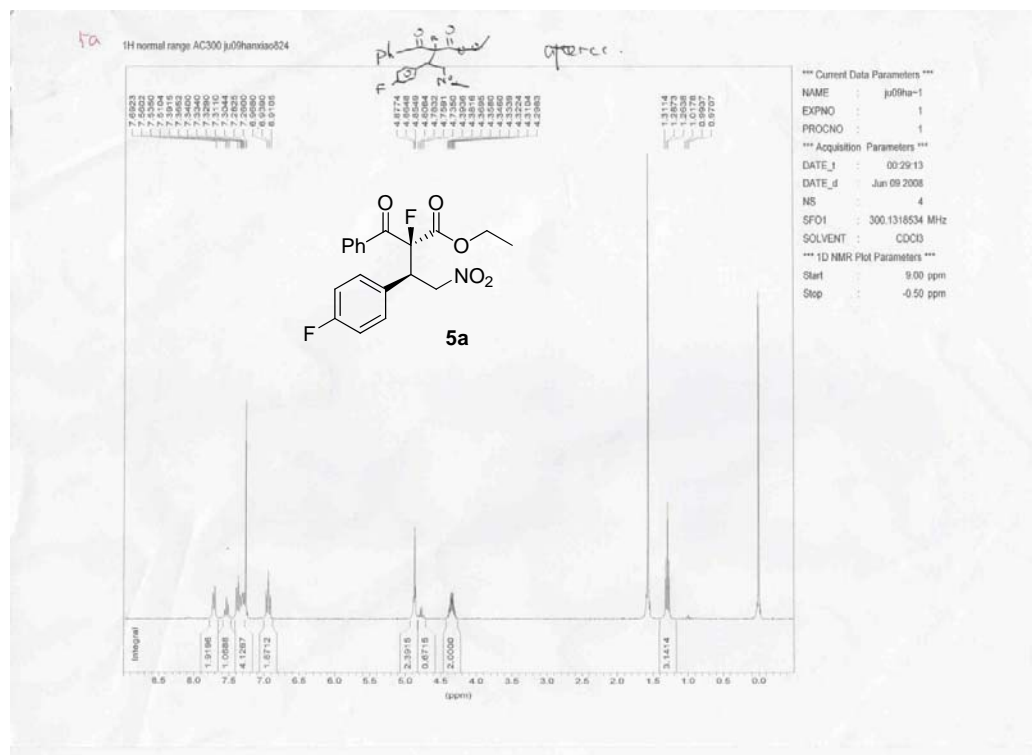

13C Standard AC300 824

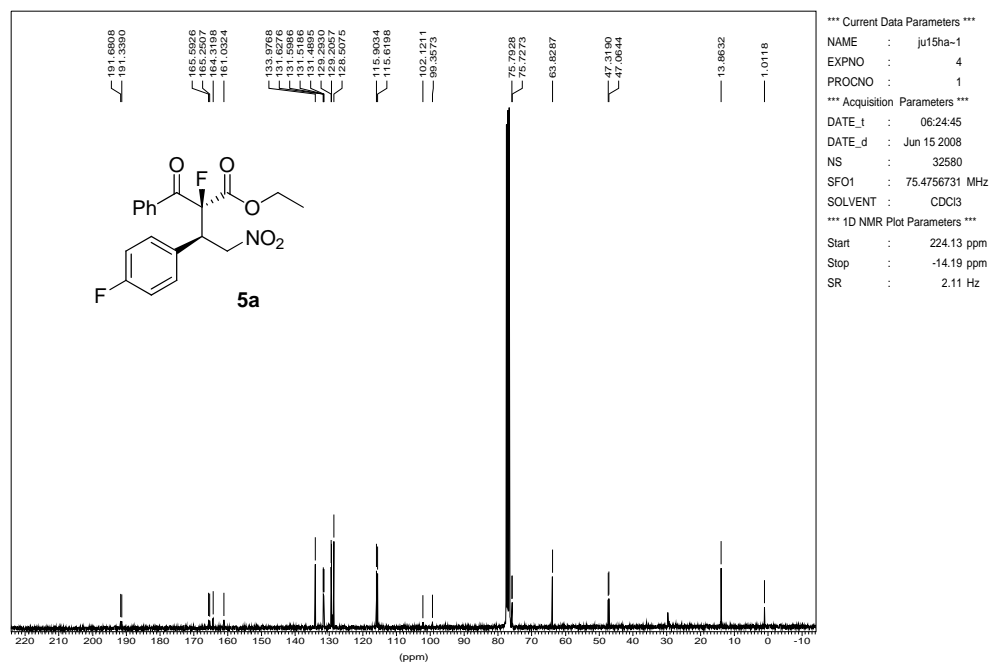

<sup>1</sup>H normal range AC300 858

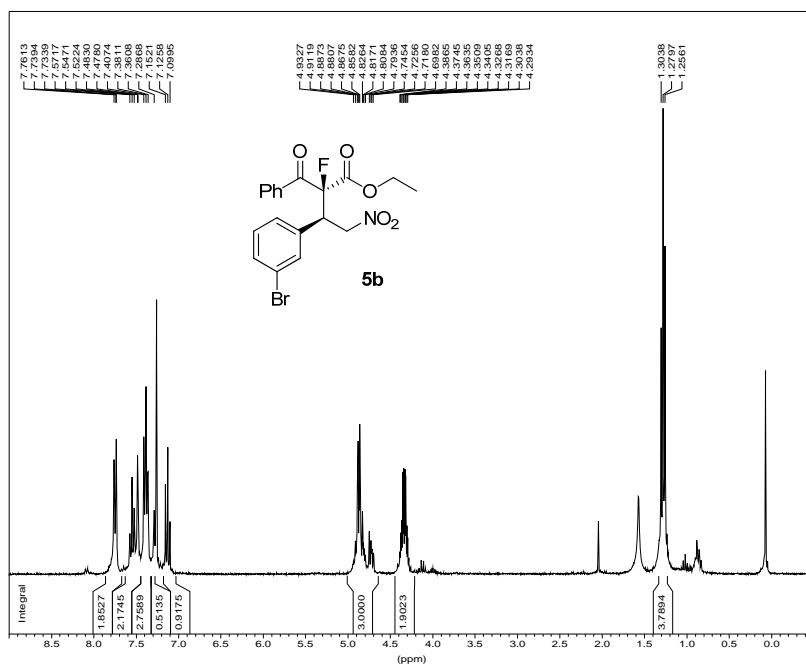

\*\*\* Current Data Parameters \*\*\*  
 NAME : ju19ha-1  
 EXPNO : 5  
 PROCNO : 1  
 \*\*\* Acquisition Parameters \*\*\*  
 DATE\_t : 03:53:24  
 DATE\_d : Jun 19 2008  
 NS : 8  
 SFO1 : 300.1318534 MHz  
 SOLVENT : CDCl3  
 \*\*\* 1D NMR Plot Parameters \*\*\*  
 Start : 9.00 ppm  
 Stop : -0.50 ppm  
 SR : 12.21 Hz

<sup>13</sup>C AMX500  
 858 in cdcl3

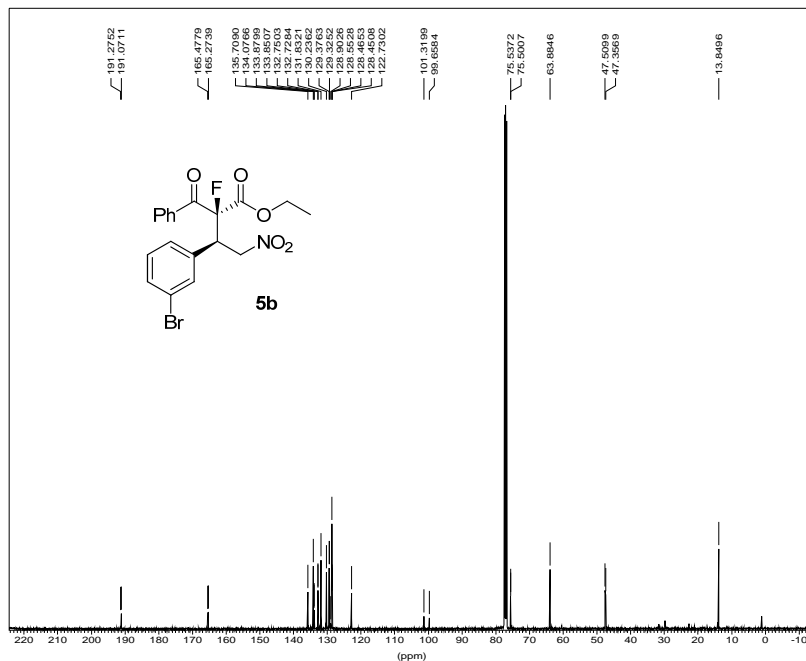

\*\*\* Current Data Parameters \*\*\*  
 NAME : hx0619  
 EXPNO : 3  
 PROCNO : 1  
 \*\*\* Acquisition Parameters \*\*\*  
 DATE\_t : 09:25:33  
 DATE\_d : Jun 19 2008  
 NS : 10466  
 SFO1 : 125.7709936 MHz  
 SOLVENT : CDCl3  
 \*\*\* 1D NMR Plot Parameters \*\*\*  
 Start : 224.40 ppm  
 Stop : -14.40 ppm  
 SR : 0.00 Hz

<sup>1</sup>H normal range AC300 885

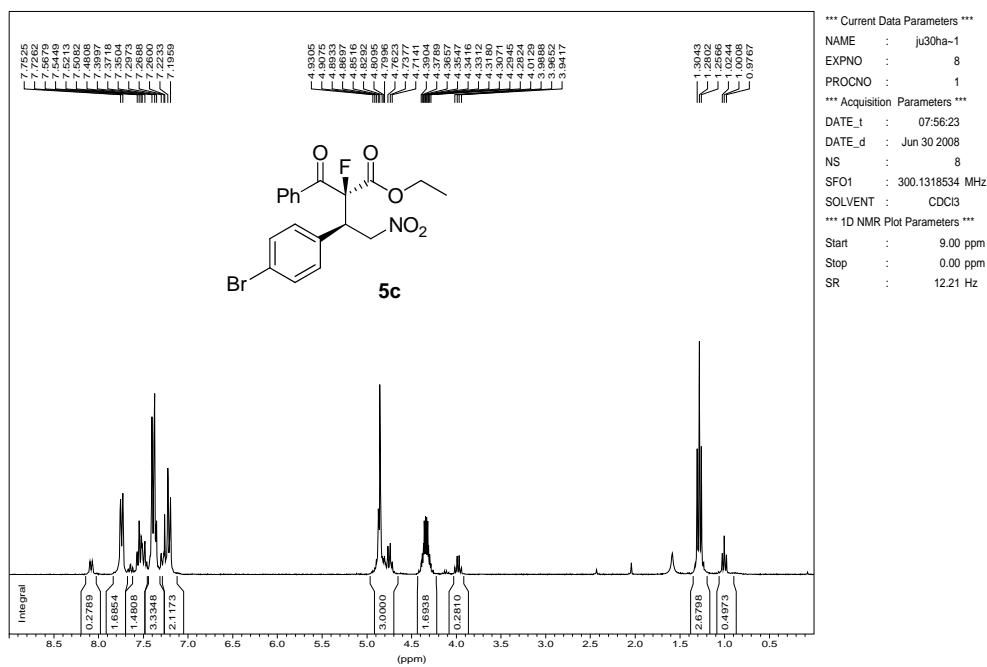

<sup>13</sup>C AMX500 1005

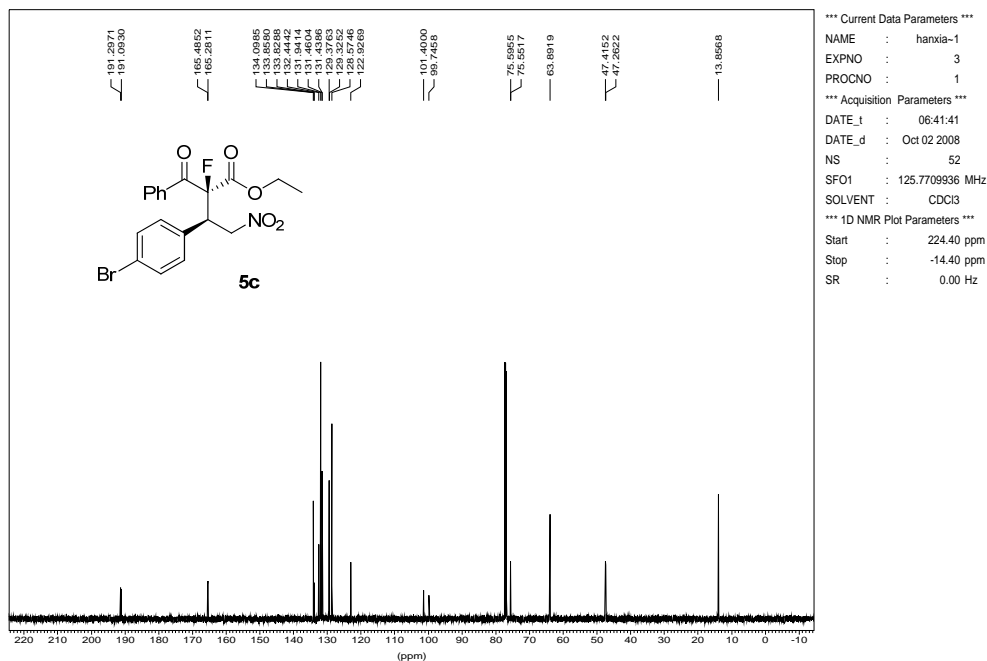

<sup>1</sup>H AMX500  
869 in cdc13

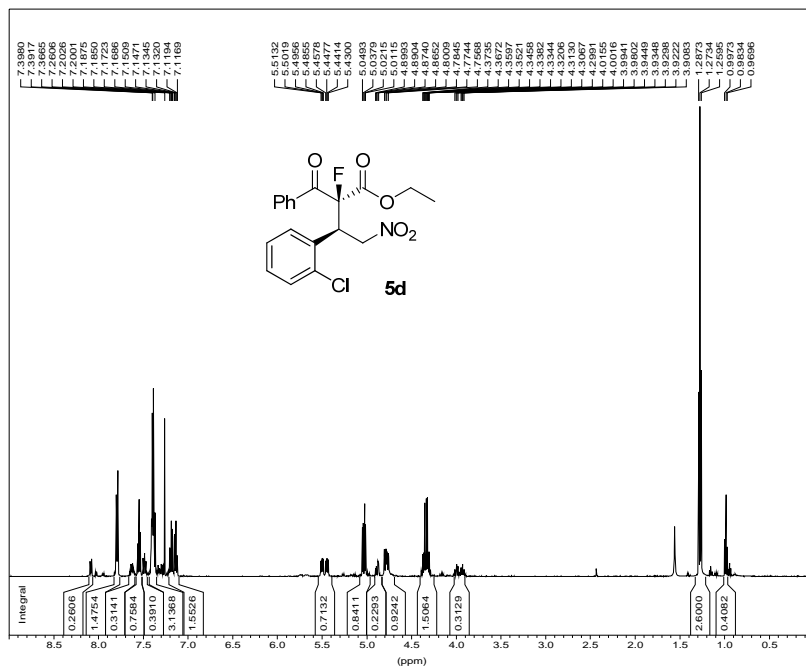

\*\*\* Current Data Parameters \*\*\*  
NAME : hx0627  
EXPNO : 1  
PROCNO : 1  
\*\*\* Acquisition Parameters \*\*\*  
DATE\_t : 08:52:19  
DATE\_d : Jun 27 2008  
NS : 8  
SFO1 : 500.1330885 MHz  
SOLVENT : CDCl3  
\*\*\* 1D NMR Plot Parameters \*\*\*  
Start : 9.00 ppm  
Stop : 0.00 ppm  
SR : 13.39 Hz

<sup>13</sup>C AMX500  
869 in cdc13

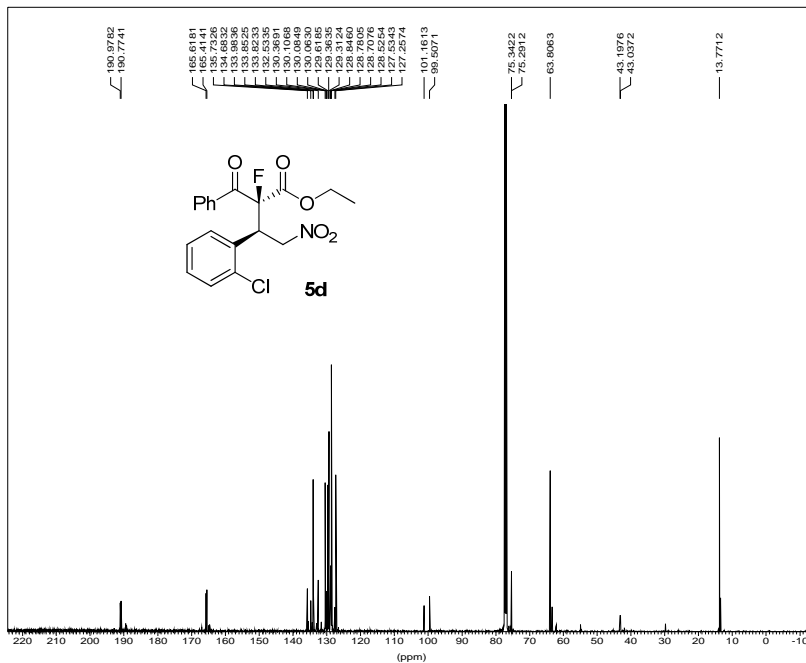

\*\*\* Current Data Parameters \*\*\*  
NAME : hx0627  
EXPNO : 2  
PROCNO : 1  
\*\*\* Acquisition Parameters \*\*\*  
DATE\_t : 08:53:42  
DATE\_d : Jun 27 2008  
NS : 11357  
SFO1 : 125.7709936 MHz  
SOLVENT : CDCl3  
\*\*\* 1D NMR Plot Parameters \*\*\*  
Start : 224.38 ppm  
Stop : -14.42 ppm  
SR : 2.53 Hz



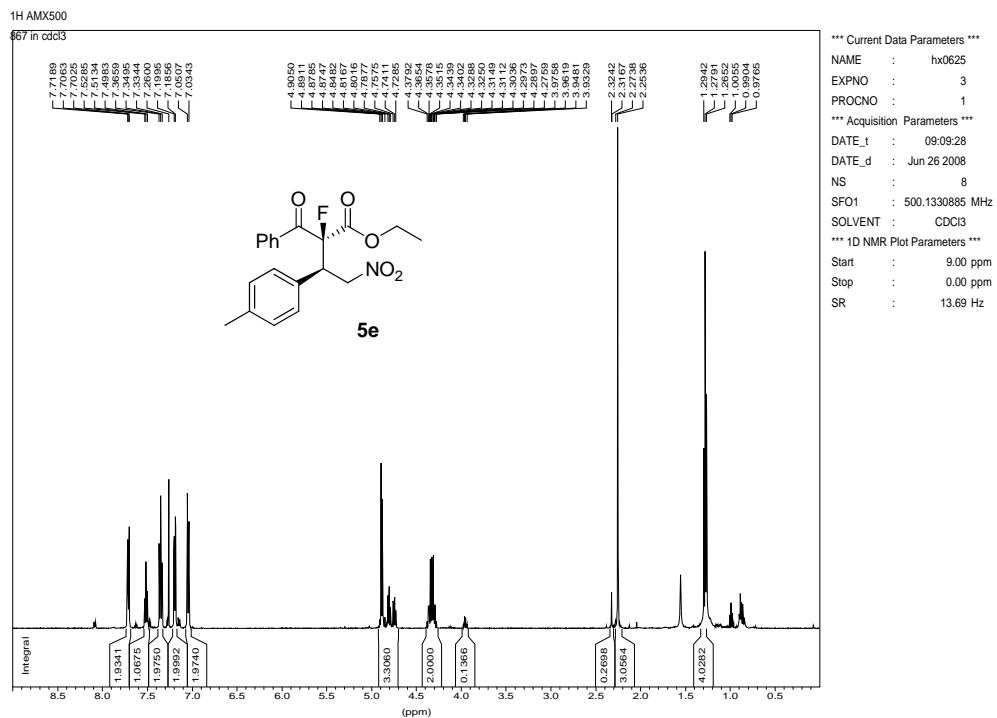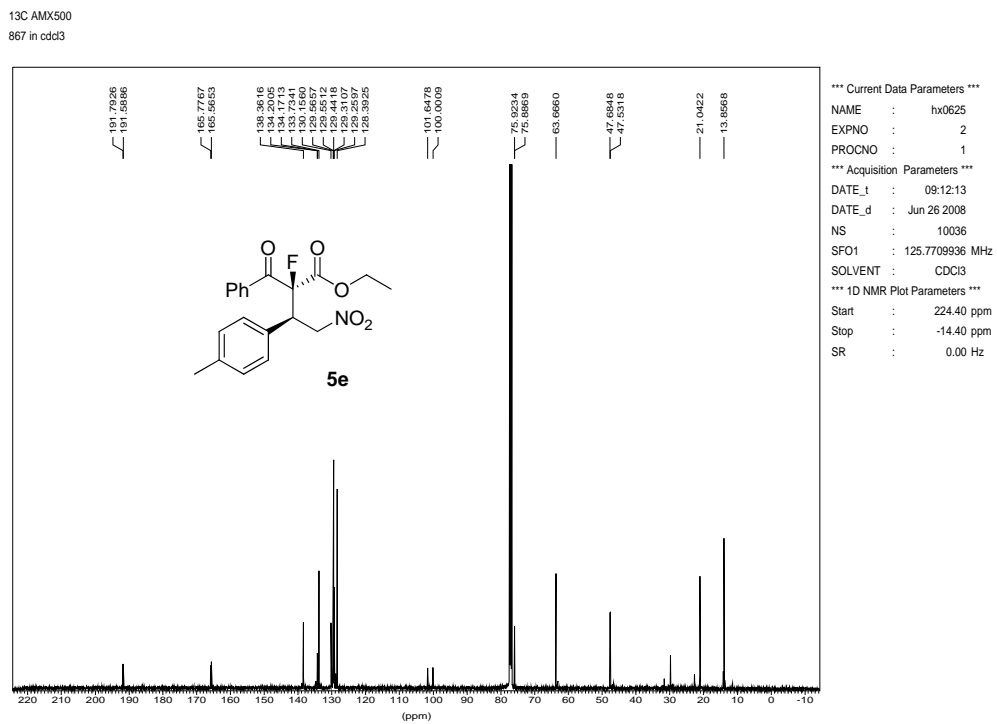

<sup>1</sup>H normal range AC300 868

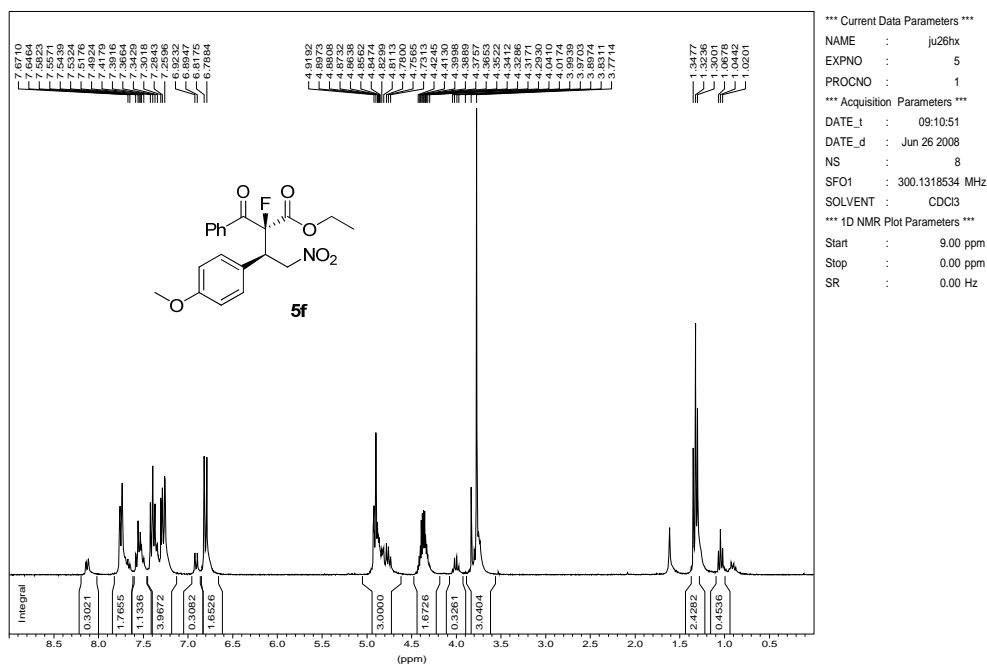

<sup>13</sup>C Standard AC300 868

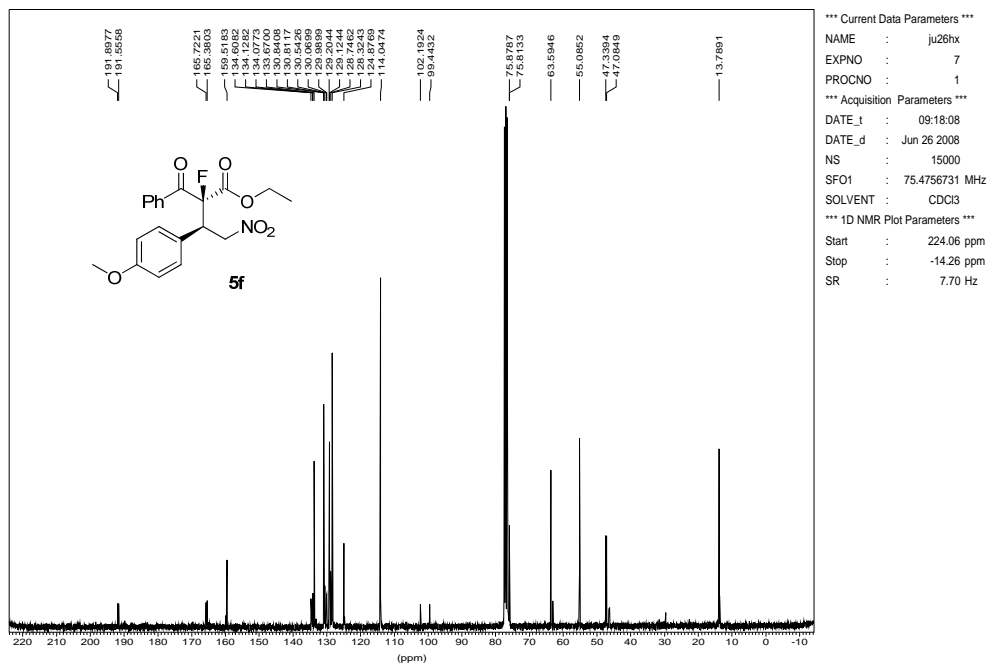

<sup>1</sup>H normal range AC300 857 chiral

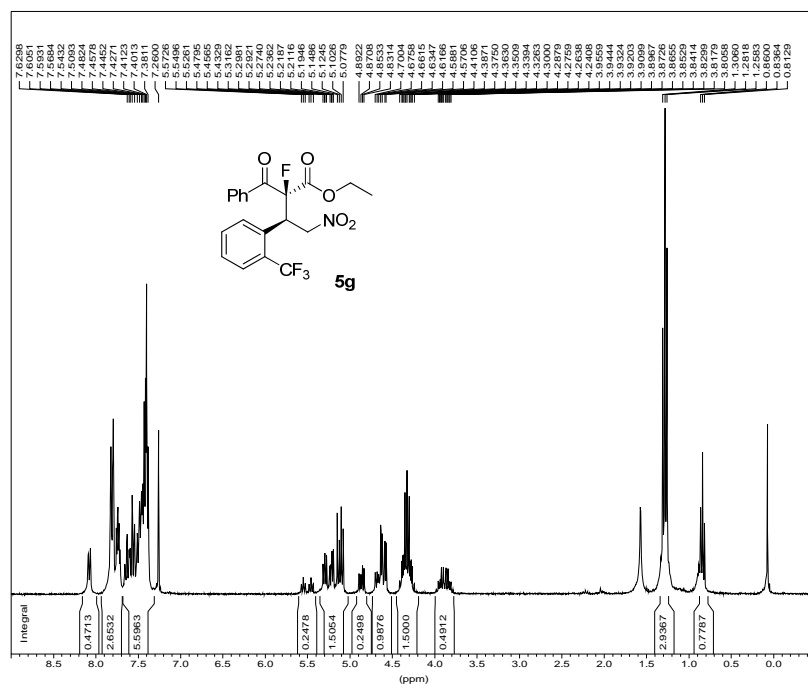

\*\*\* Current Data Parameters \*\*\*

NAME : ju19ha-1  
 EXPNO : 2  
 PROCNO : 1  
 \*\*\* Acquisition Parameters \*\*\*  
 DATE\_t : 03:32:21  
 DATE\_d : Jun 19 2008  
 NS : 8  
 SFO1 : 300.1318534 MHz  
 SOLVENT : CDCl3  
 \*\*\* 1D NMR Plot Parameters \*\*\*  
 Start : 9.00 ppm  
 Stop : -0.50 ppm  
 SR : 12.05 Hz

<sup>13</sup>C Standard AC300 857

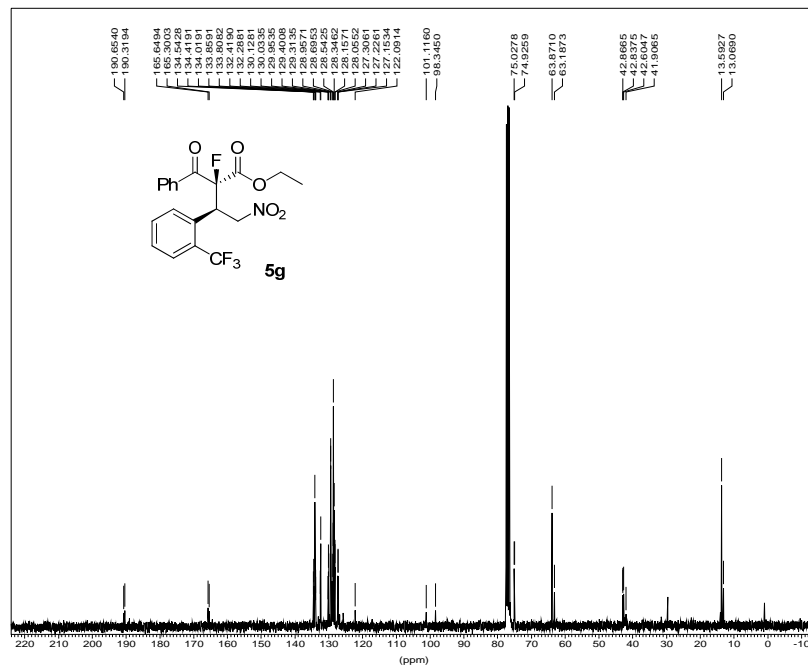

\*\*\* Current Data Parameters \*\*\*

NAME : ju19ha-1  
 EXPNO : 4  
 PROCNO : 1  
 \*\*\* Acquisition Parameters \*\*\*  
 DATE\_t : 03:38:00  
 DATE\_d : Jun 19 2008  
 NS : 5823  
 SFO1 : 75.4756731 MHz  
 SOLVENT : CDCl3  
 \*\*\* 1D NMR Plot Parameters \*\*\*  
 Start : 224.06 ppm  
 Stop : -14.26 ppm  
 SR : 7.70 Hz

<sup>1</sup>H normal range AC300 859 chiral

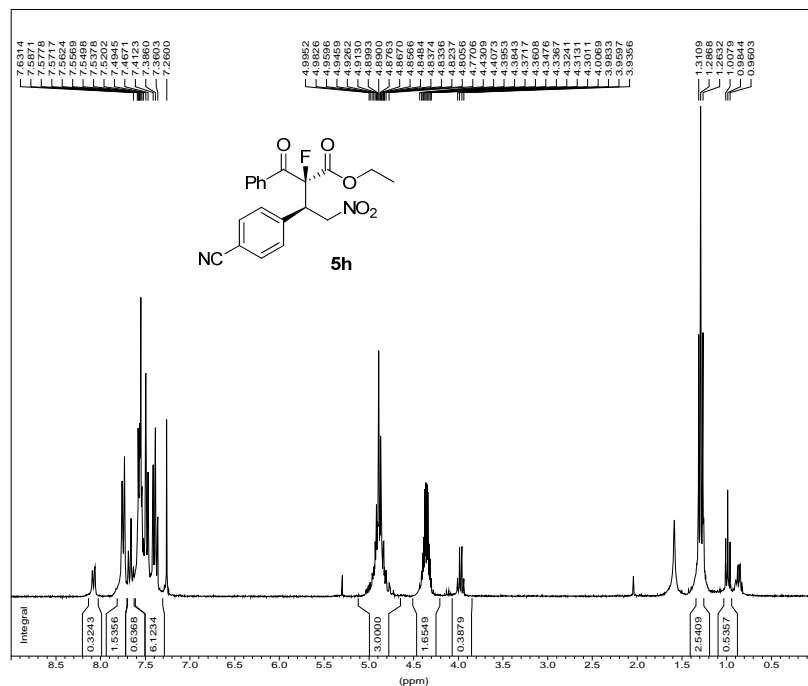

\*\*\* Current Data Parameters \*\*\*  
 NAME : ju20ha-1  
 EXPNO : 3  
 PROCNO : 1  
 \*\*\* Acquisition Parameters \*\*\*  
 DATE\_t : 08:47:11  
 DATE\_d : Jun 20 2008  
 NS : 8  
 SFO1 : 300.1318534 MHz  
 SOLVENT : CDCl3  
 \*\*\* 1D NMR Plot Parameters \*\*\*  
 Start : 9.00 ppm  
 Stop : 0.00 ppm  
 SR : 12.21 Hz

<sup>13</sup>C Standard AC300 859

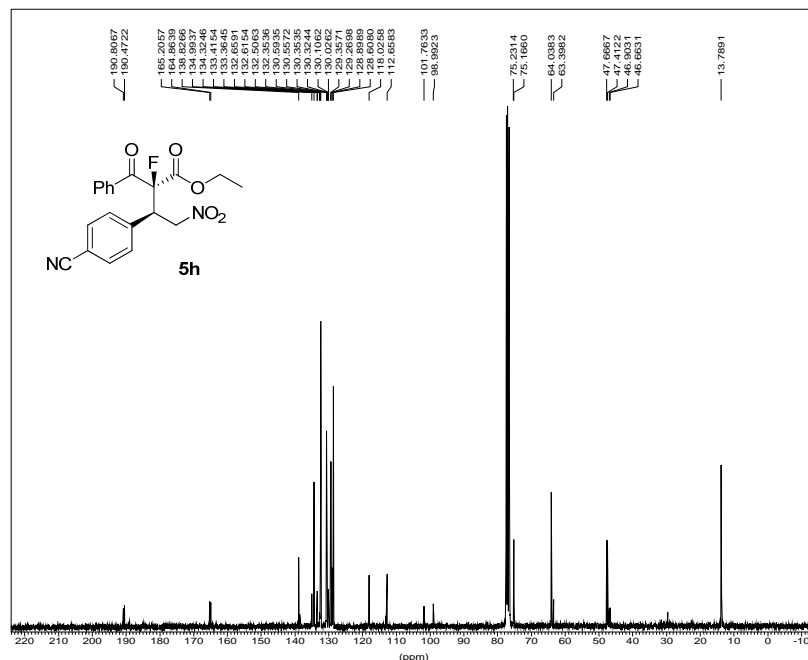

\*\*\* Current Data Parameters \*\*\*  
 NAME : ju20ha-1  
 EXPNO : 5  
 PROCNO : 1  
 \*\*\* Acquisition Parameters \*\*\*  
 DATE\_t : 08:52:16  
 DATE\_d : Jun 20 2008  
 NS : 18001  
 SFO1 : 75.4756731 MHz  
 SOLVENT : CDCl3  
 \*\*\* 1D NMR Plot Parameters \*\*\*  
 Start : 224.06 ppm  
 Stop : -14.26 ppm  
 SR : 7.70 Hz

<sup>1</sup>H normal range AC300 884

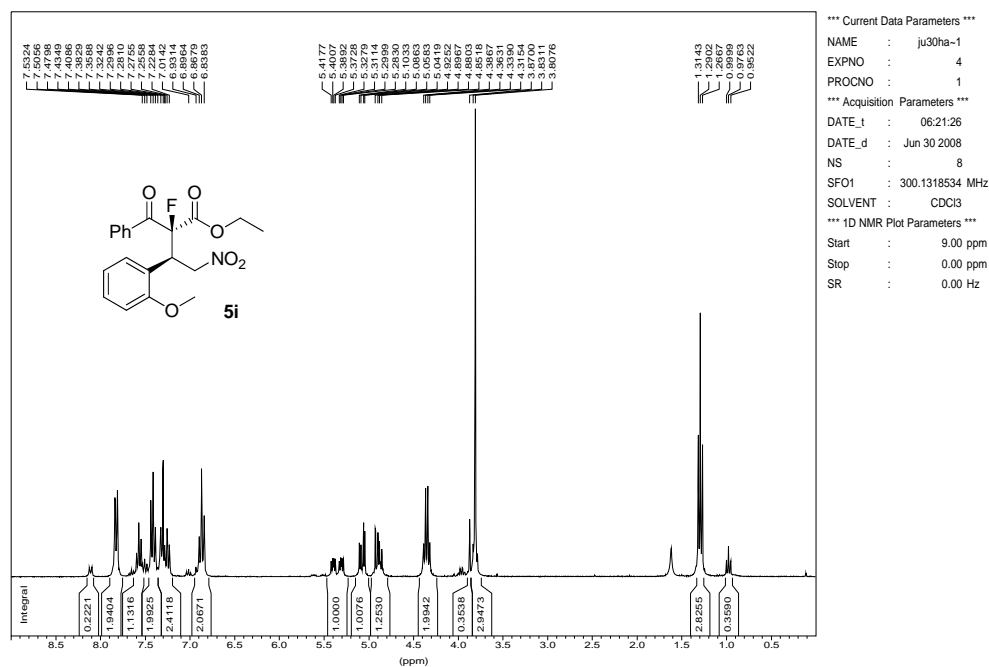

<sup>13</sup>C Standard AC300 884

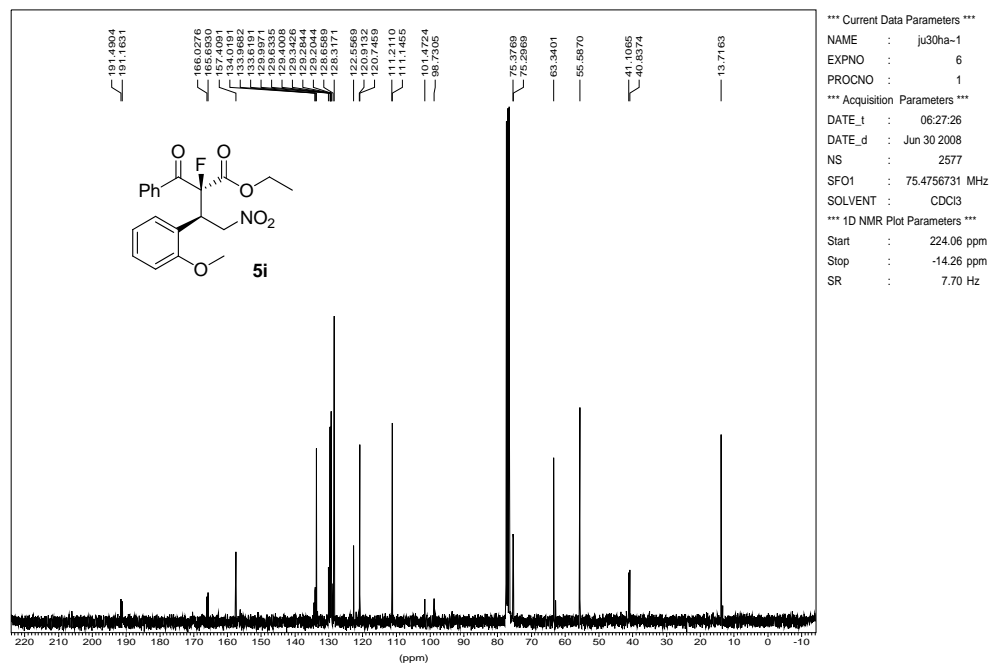

<sup>1</sup>H AMX500 887

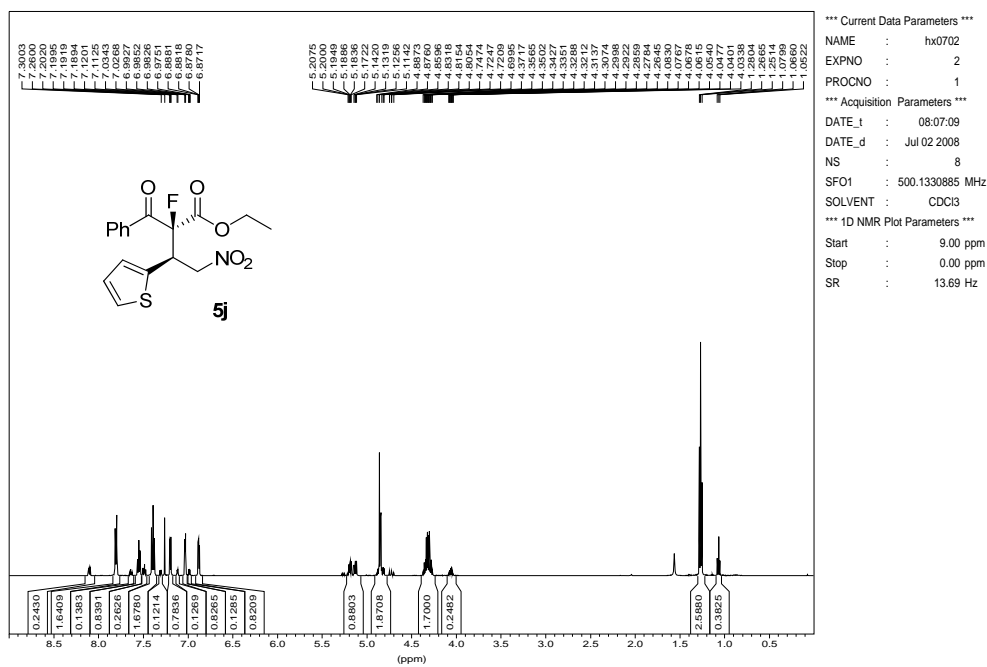

<sup>13</sup>C AMX500 887

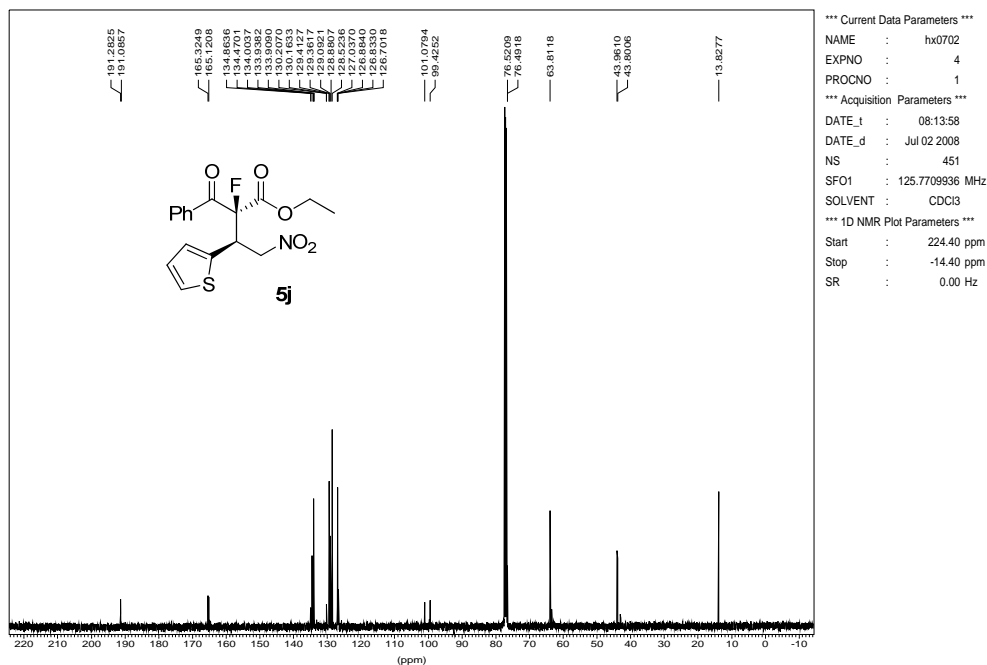

1H AMX500 Iuojie-464-1-chiral

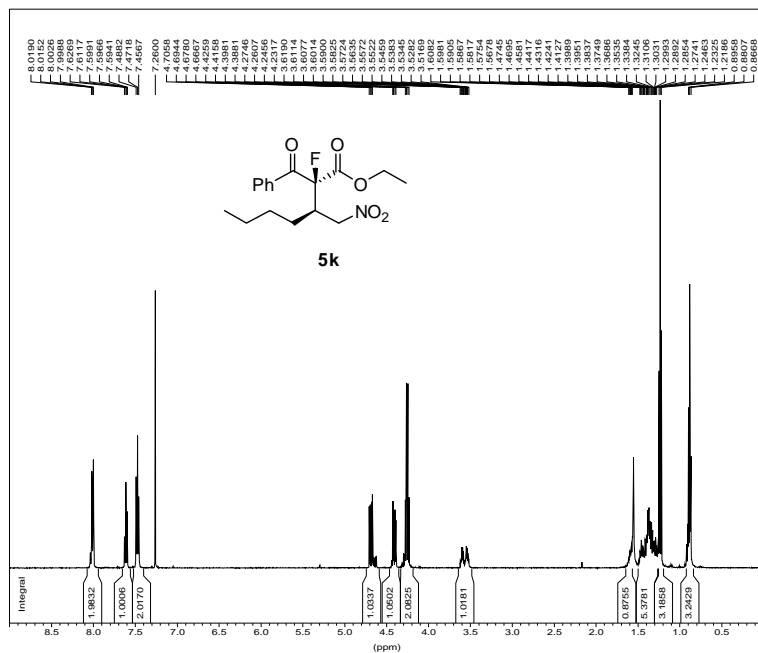

\*\*\* Current Data Parameters \*\*\*  
NAME : hx0207  
EXPNO : 1  
PROCNO : 1  
\*\*\* Acquisition Parameters \*\*\*  
DATE\_t : 05:07:03  
DATE\_d : Feb 07 2009  
DBPNAM7 :  
DS : 0  
NS : 8  
O1 : 3088.51 Hz  
O2 : 3088.51 Hz  
O3 : 3088.51 Hz  
SFO1 : 500.1330885 MHz  
SFO2 : 500.1330885 MHz  
SFO3 : 500.1330885 MHz  
SOLVENT : CDCl3  
\*\*\* Processing Parameters \*\*\*  
AZFW : 0.100 ppm  
\*\*\* 1D NMR Plot Parameters \*\*\*  
SR : 13.69 Hz

13C AMX500 Iuojie-464-1-chiral

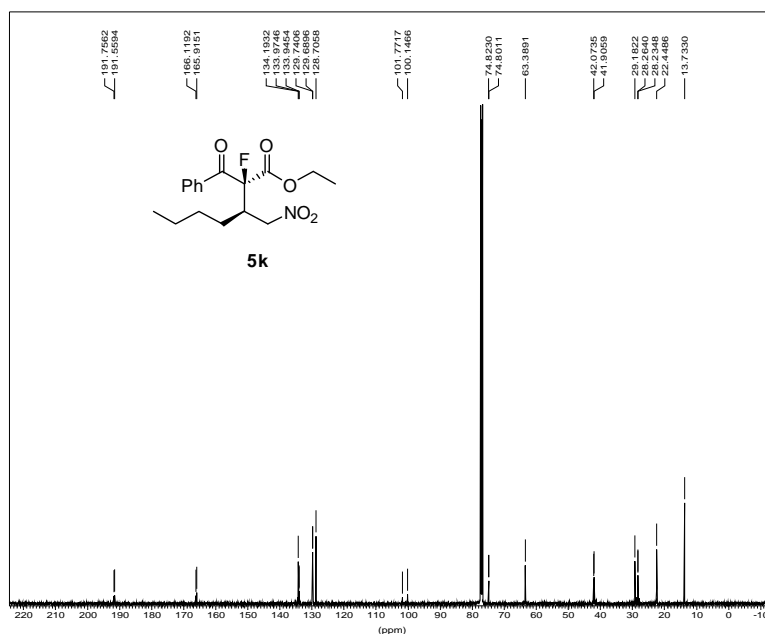

\*\*\* Current Data Parameters \*\*\*  
NAME : hx0207  
EXPNO : 2  
PROCNO : 1  
\*\*\* Acquisition Parameters \*\*\*  
DATE\_t : 05:08:33  
DATE\_d : Feb 07 2009  
DBPNAM7 :  
DS : 0  
NS : 3308  
O1 : 13204.57 Hz  
O2 : 2000.52 Hz  
O3 : 12575.30 Hz  
SFO1 : 125.7709936 MHz  
SFO2 : 500.1320005 MHz  
SFO3 : 125.7703643 MHz  
SOLVENT : CDCl3  
\*\*\* Processing Parameters \*\*\*  
AZFW : 0.500 ppm  
\*\*\* 1D NMR Plot Parameters \*\*\*  
SR : 0.00 Hz

1H AMX500 1324

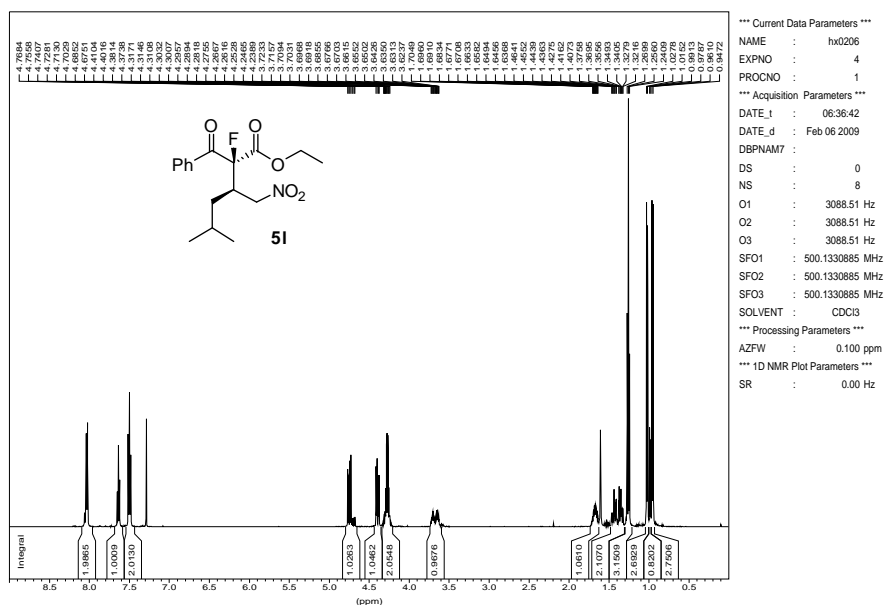

13C AMX500 1324

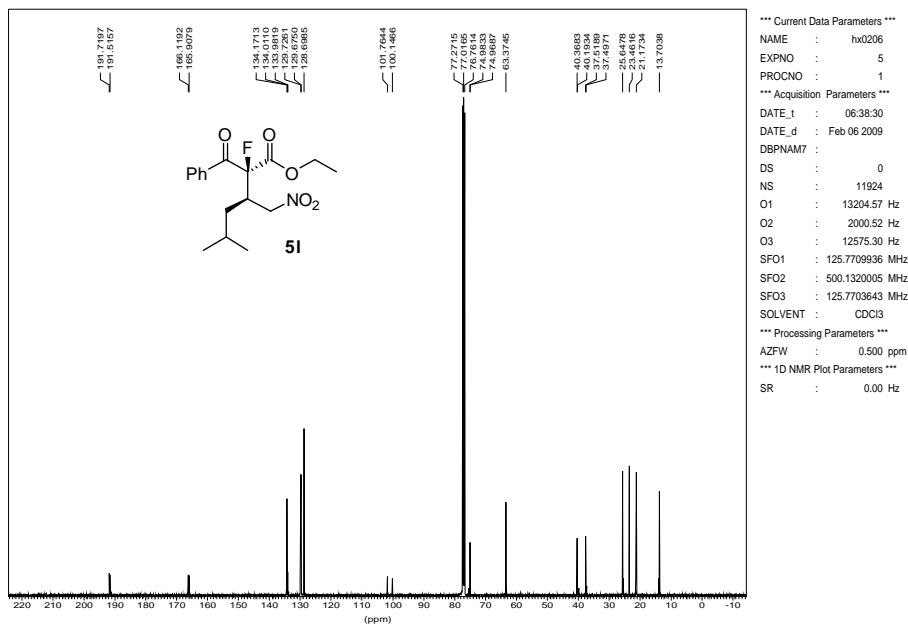



<sup>1</sup>H normal range AC300 921-chiral

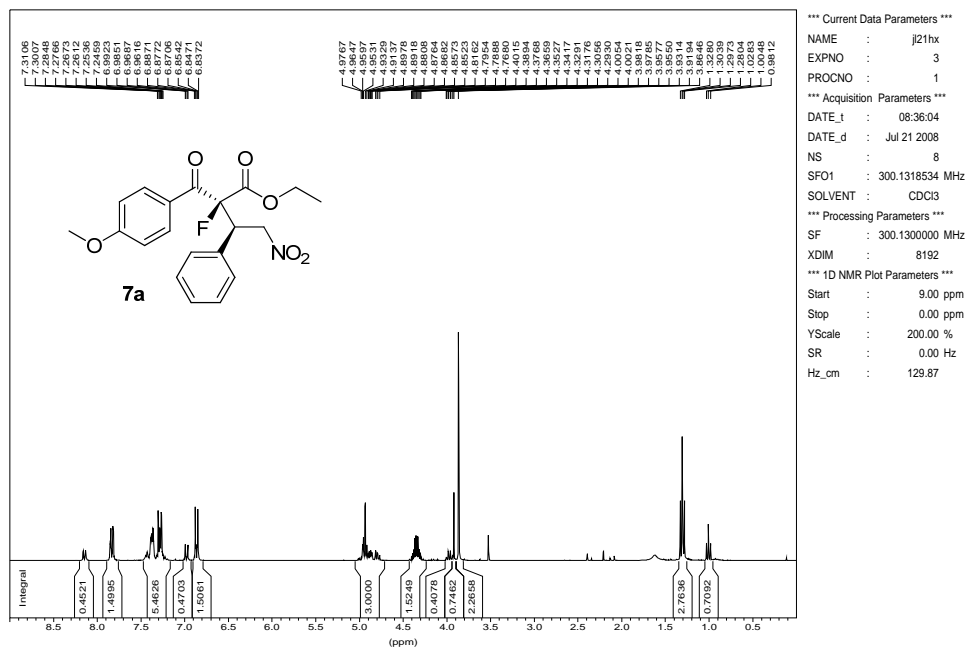

<sup>13</sup>C Standard AC300 921

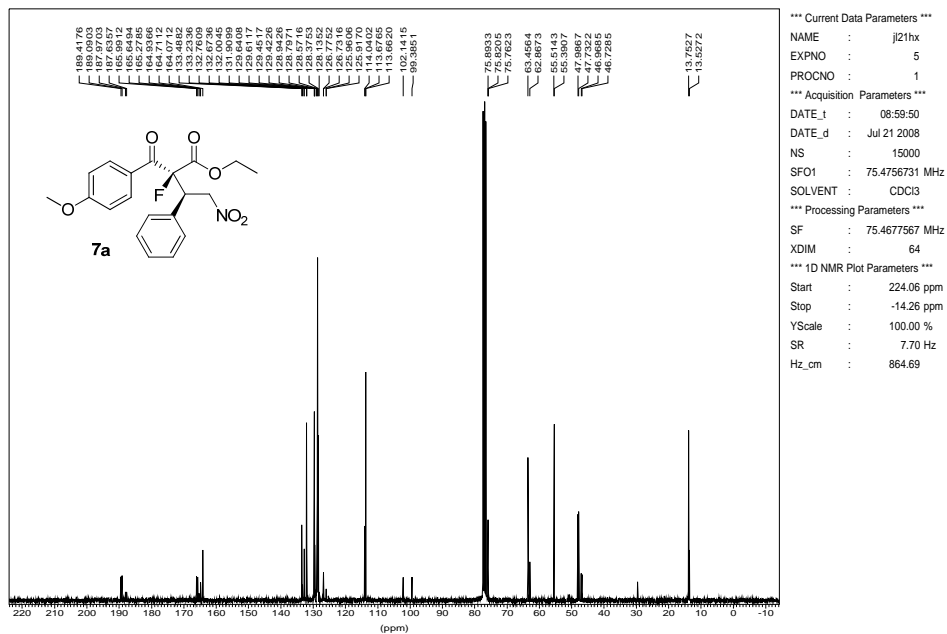

<sup>1</sup>H AMX500 968 chiral

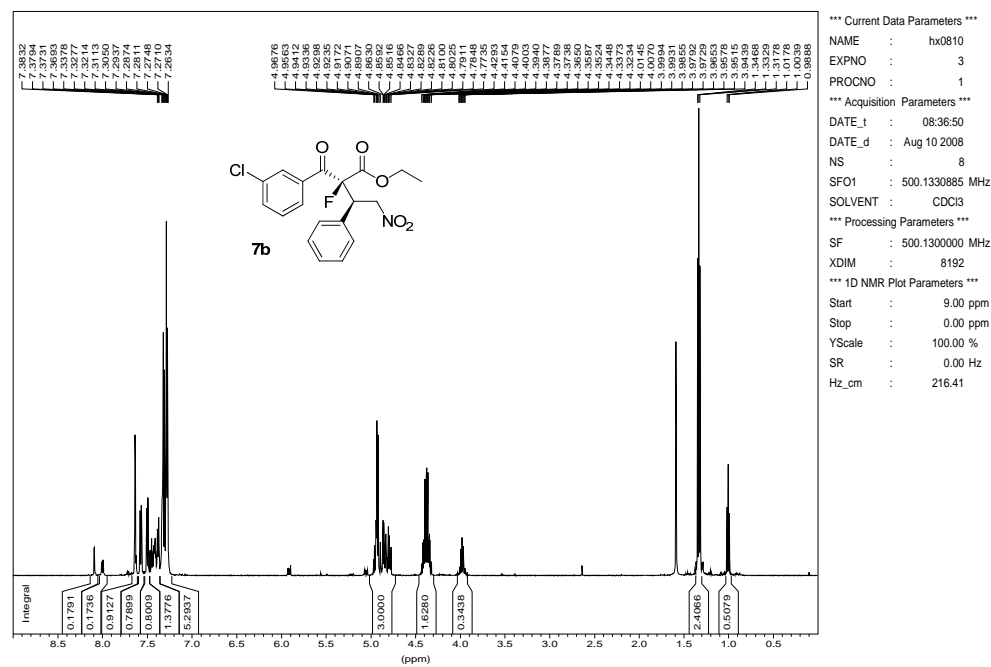

<sup>13</sup>C AMX500 968 chiral

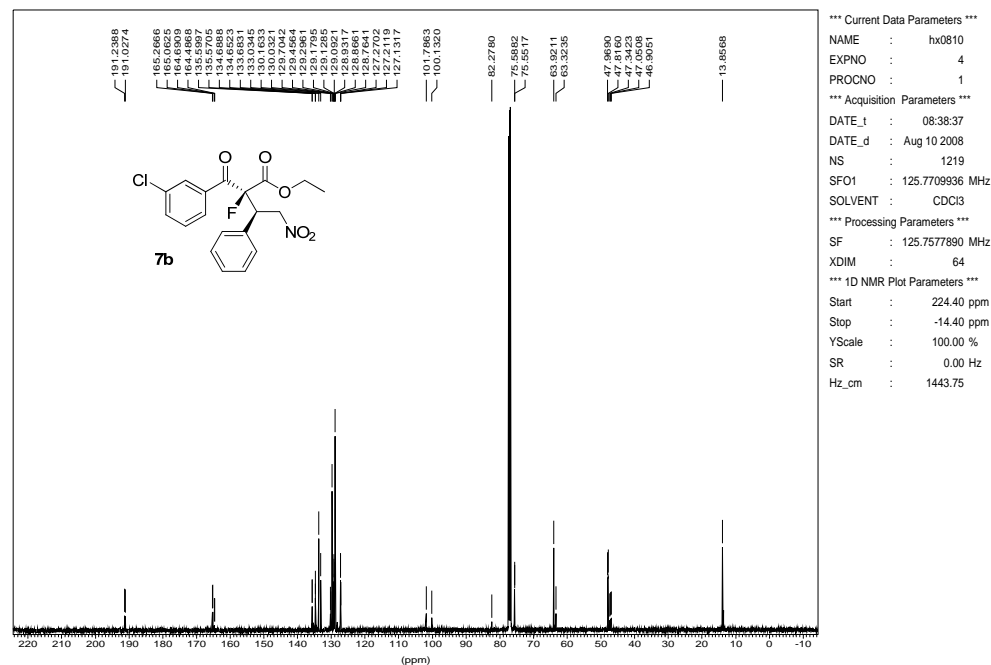

<sup>1</sup>H AMX500 970 chiral

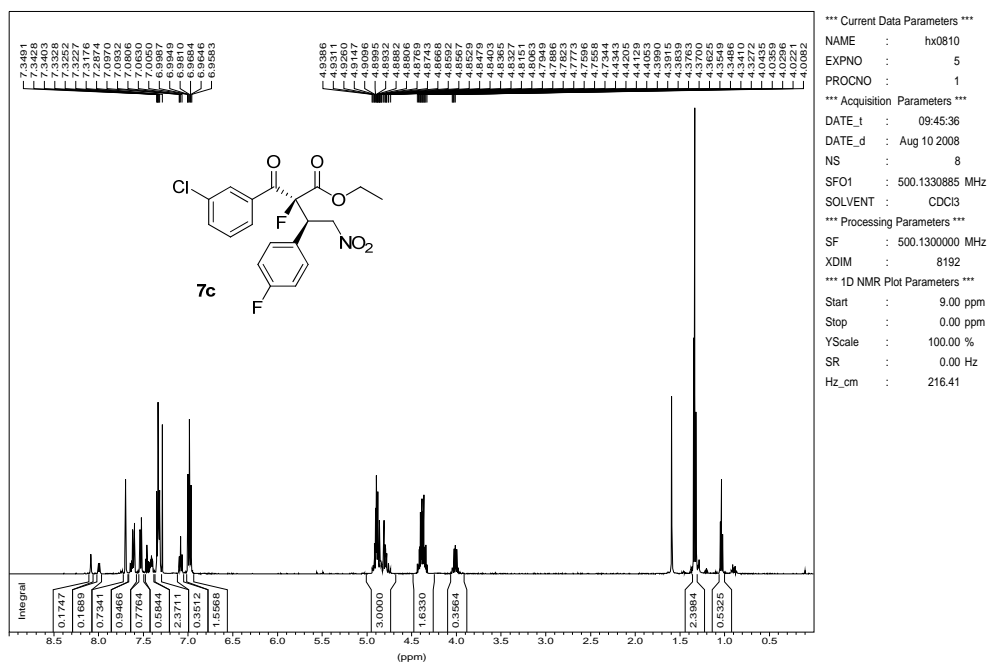

<sup>13</sup>C AMX500 970 chiral

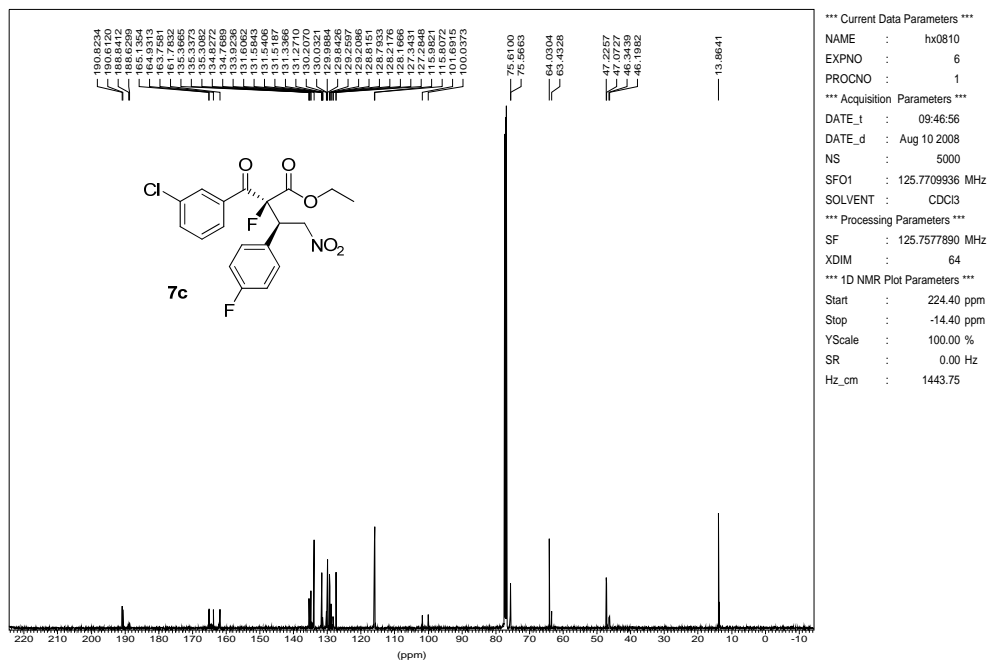

<sup>1</sup>H AMX500 923

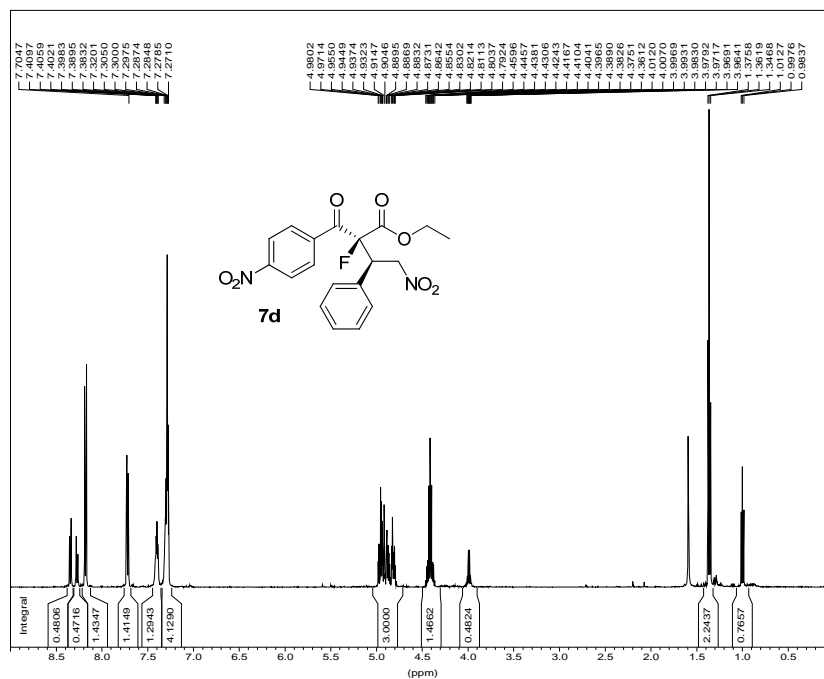

\*\*\* Current Data Parameters \*\*\*

NAME : hx0719  
 EXPNO : 3  
 PROCNO : 1  
 \*\*\* Acquisition Parameters \*\*\*  
 DATE\_t : 09:22:43  
 DATE\_d : Jul 19 2008  
 NS : 8  
 SFO1 : 500.1330885 MHz  
 SOLVENT : CDCl3  
 \*\*\* Processing Parameters \*\*\*  
 SF : 500.1300000 MHz  
 XDIM : 8192  
 \*\*\* 1D NMR Plot Parameters \*\*\*  
 Start : 9.00 ppm  
 Stop : 0.00 ppm  
 YScale : 100.00 %  
 SR : 0.00 Hz  
 Hz\_cm : 216.41

<sup>13</sup>C AMX500 923

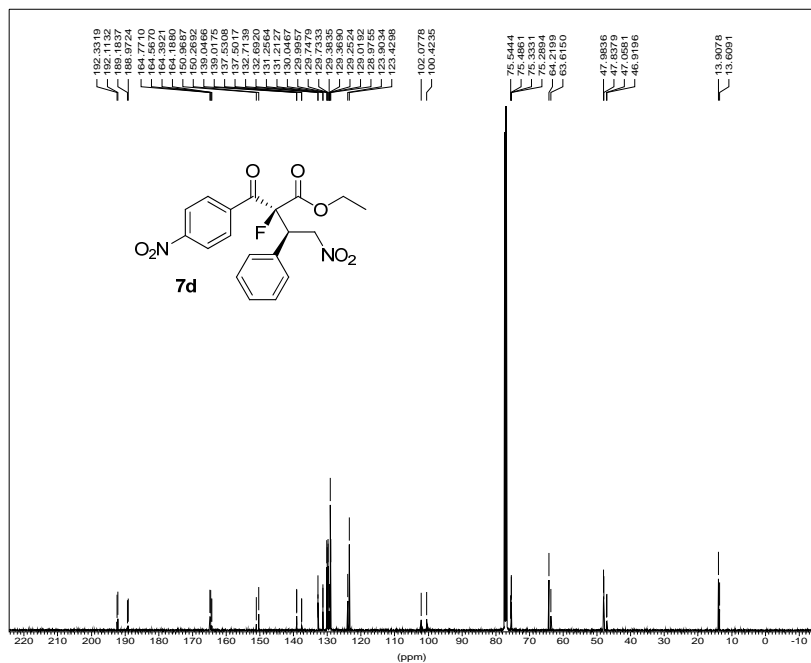

\*\*\* Current Data Parameters \*\*\*

NAME : hx0719  
 EXPNO : 4  
 PROCNO : 1  
 \*\*\* Acquisition Parameters \*\*\*  
 DATE\_t : 09:24:40  
 DATE\_d : Jul 19 2008  
 NS : 10110  
 SFO1 : 125.7709936 MHz  
 SOLVENT : CDCl3  
 \*\*\* Processing Parameters \*\*\*  
 SF : 125.7577890 MHz  
 XDIM : 64  
 \*\*\* 1D NMR Plot Parameters \*\*\*  
 Start : 224.40 ppm  
 Stop : -14.40 ppm  
 YScale : 100.00 %  
 SR : 0.00 Hz  
 Hz\_cm : 1443.75

1H AMX500 955

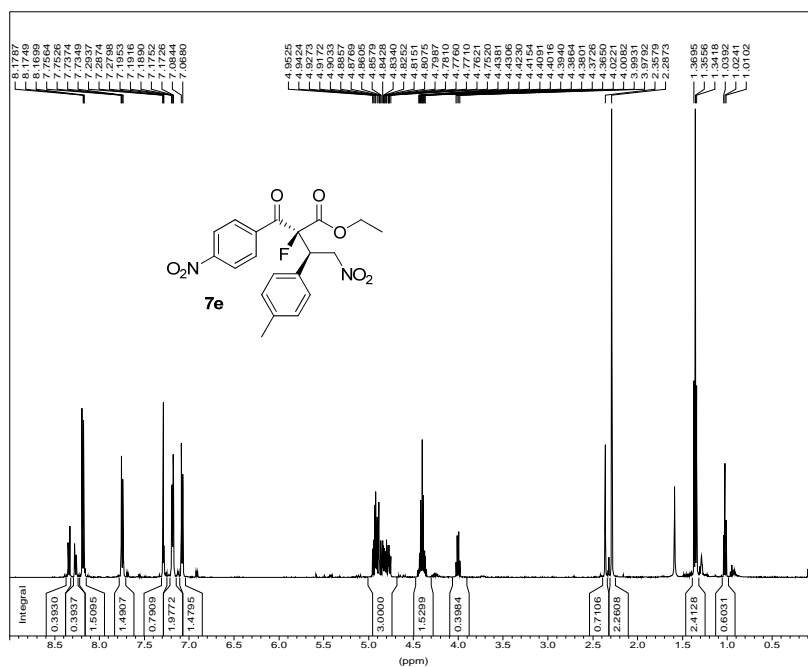

\*\*\* Current Data Parameters \*\*\*

NAME : hx0801  
 EXPNO : 2  
 PROCNO : 1  
 \*\*\* Acquisition Parameters \*\*\*  
 DATE\_t : 06:36:18  
 DATE\_d : Aug 01 2008  
 NS : 8  
 SFO1 : 500.1330885 MHz  
 SOLVENT : CDCl3  
 \*\*\* Processing Parameters \*\*\*  
 SF : 500.1300000 MHz  
 XDIM : 8192  
 \*\*\* 1D NMR Plot Parameters \*\*\*  
 Start : 9.00 ppm  
 Stop : 0.00 ppm  
 YScale : 100.00 %  
 SR : 0.00 Hz  
 Hz\_cm : 216.41

13C AMX500 955

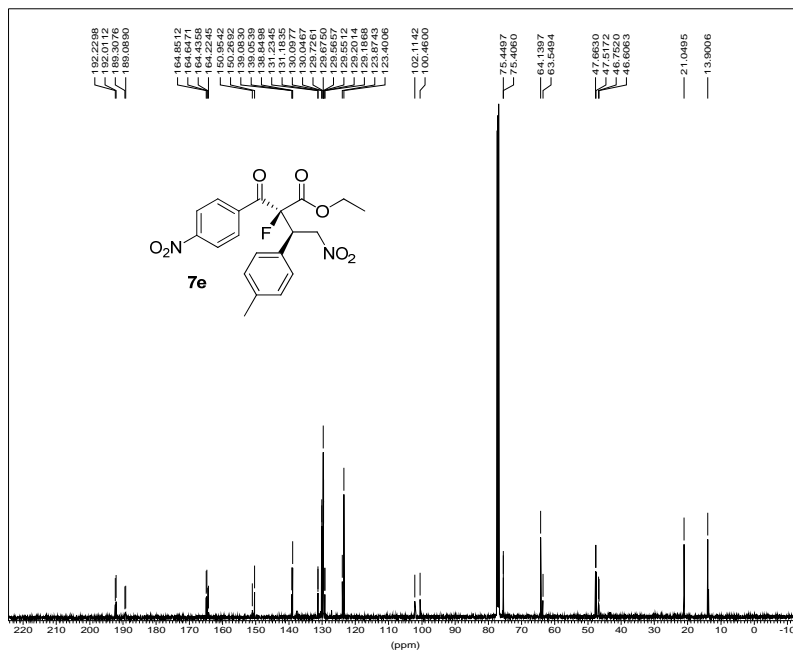

\*\*\* Current Data Parameters \*\*\*

NAME : hx0801  
 EXPNO : 1  
 PROCNO : 1  
 \*\*\* Acquisition Parameters \*\*\*  
 DATE\_t : 06:38:13  
 DATE\_d : Aug 01 2008  
 NS : 1751  
 SFO1 : 125.7709936 MHz  
 SOLVENT : CDCl3  
 \*\*\* Processing Parameters \*\*\*  
 SF : 125.7577890 MHz  
 XDIM : 64  
 \*\*\* 1D NMR Plot Parameters \*\*\*  
 Start : 224.40 ppm  
 Stop : -14.40 ppm  
 YScale : 100.00 %  
 SR : 0.00 Hz  
 Hz\_cm : 1443.75

1H AMX500 944

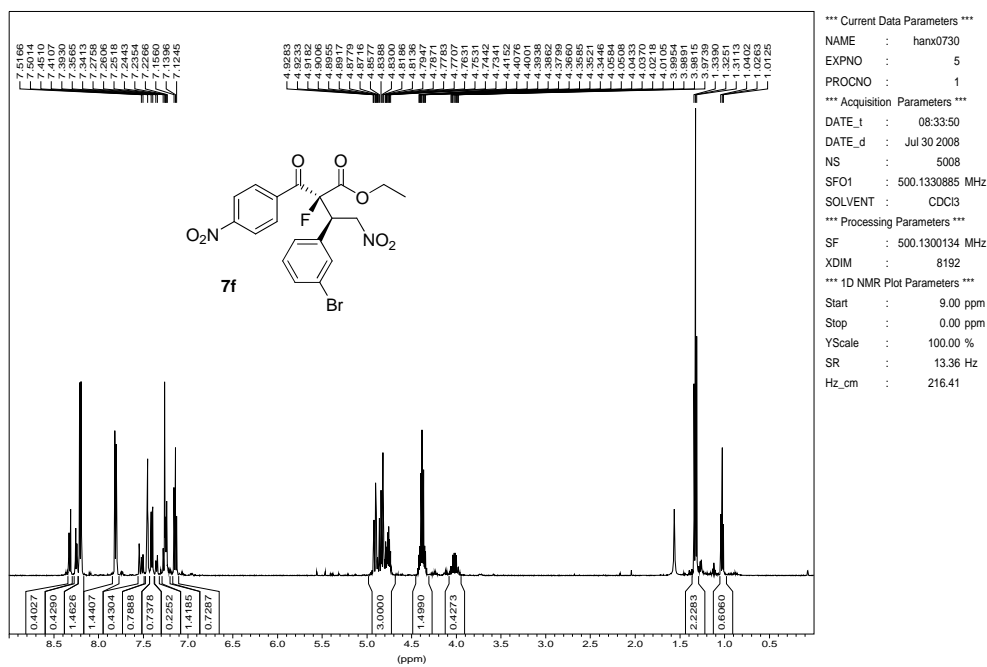

13C AMX500 944 chiral

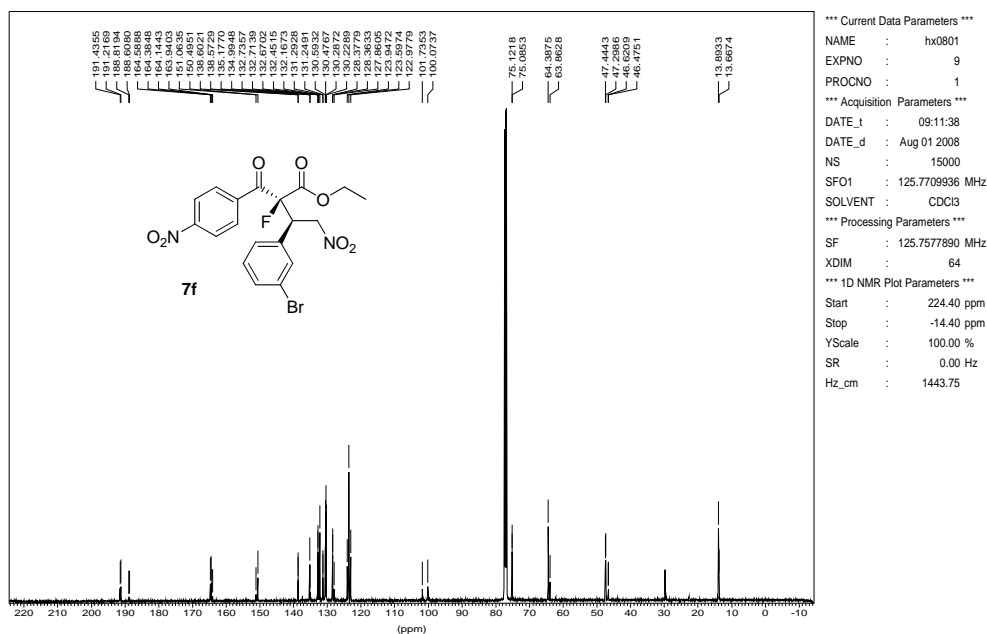

<sup>1</sup>H AMX500 964 chiral

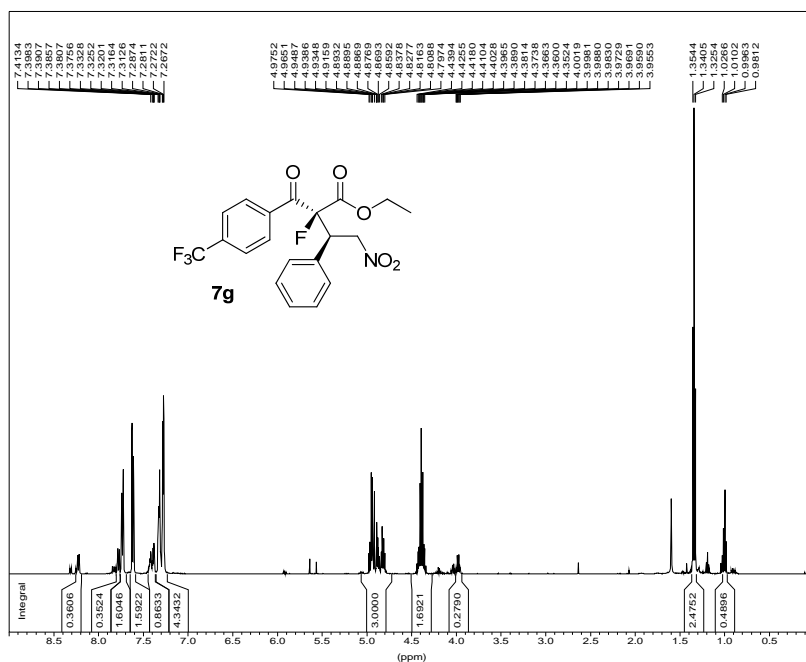

\*\*\* Current Data Parameters \*\*\*  
 NAME : hx0810  
 EXPNO : 1  
 PROCNO : 1  
 \*\*\* Acquisition Parameters \*\*\*  
 DATE\_t : 06:39:56  
 DATE\_d : Aug 10 2008  
 NS : 8  
 SFO1 : 500.1330885 MHz  
 SOLVENT : CDCl3  
 \*\*\* Processing Parameters \*\*\*  
 SF : 500.1300000 MHz  
 XDIM : 8192  
 \*\*\* 1D NMR Plot Parameters \*\*\*  
 Start : 9.00 ppm  
 Stop : 0.00 ppm  
 YScale : 100.00 %  
 SR : 0.00 Hz  
 Hz\_cm : 216.41

<sup>13</sup>C AMX500 964 chiral

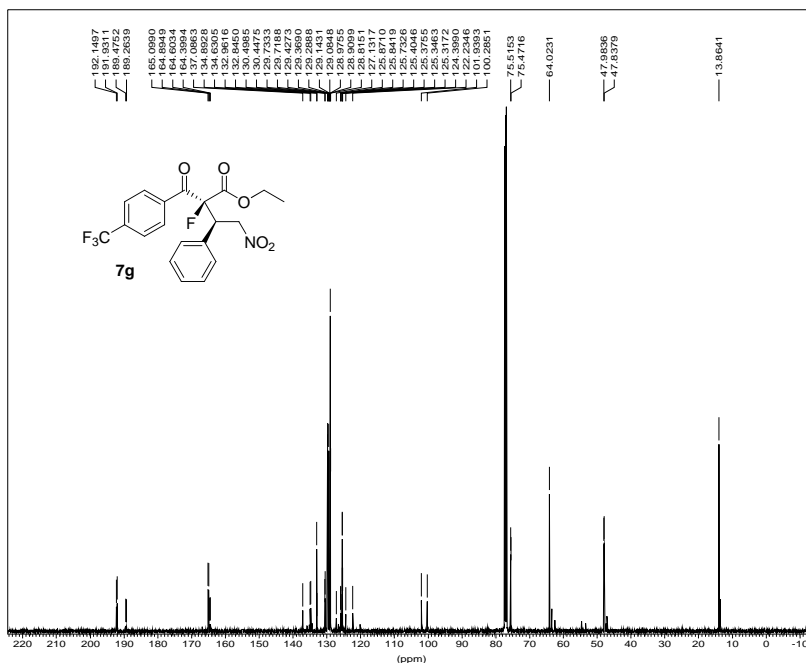

\*\*\* Current Data Parameters \*\*\*  
 NAME : hx0810  
 EXPNO : 2  
 PROCNO : 1  
 \*\*\* Acquisition Parameters \*\*\*  
 DATE\_t : 06:41:41  
 DATE\_d : Aug 10 2008  
 NS : 2148  
 SFO1 : 125.7709936 MHz  
 SOLVENT : CDCl3  
 \*\*\* Processing Parameters \*\*\*  
 SF : 125.7577890 MHz  
 XDIM : 64  
 \*\*\* 1D NMR Plot Parameters \*\*\*  
 Start : 224.40 ppm  
 Stop : -14.40 ppm  
 YScale : 100.00 %  
 SR : 0.00 Hz  
 Hz\_cm : 1443.75

<sup>1</sup>H AMX500 966 chiral

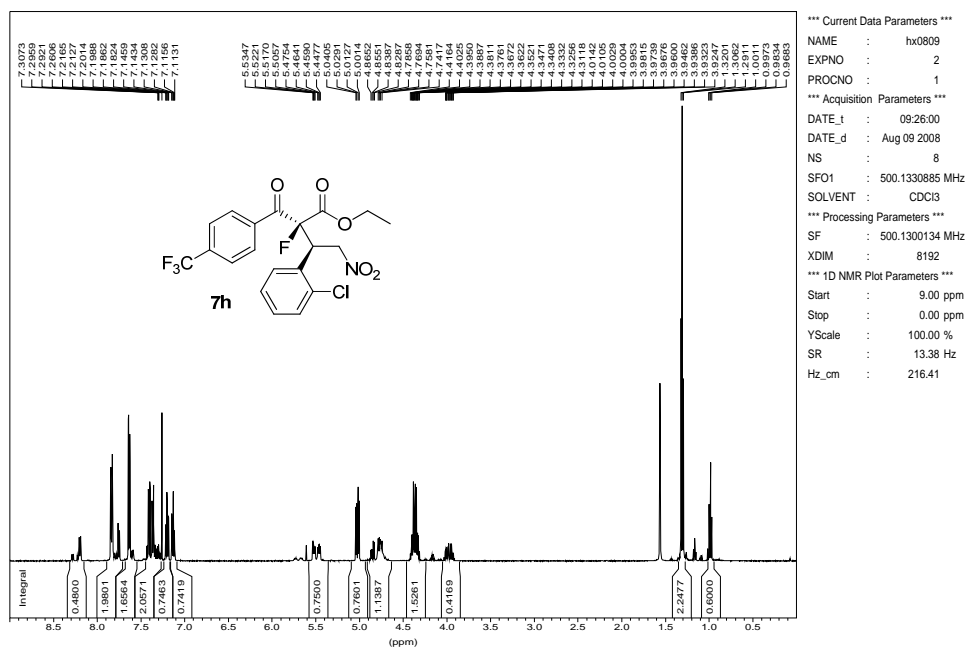

<sup>13</sup>C AMX500 966 chiral

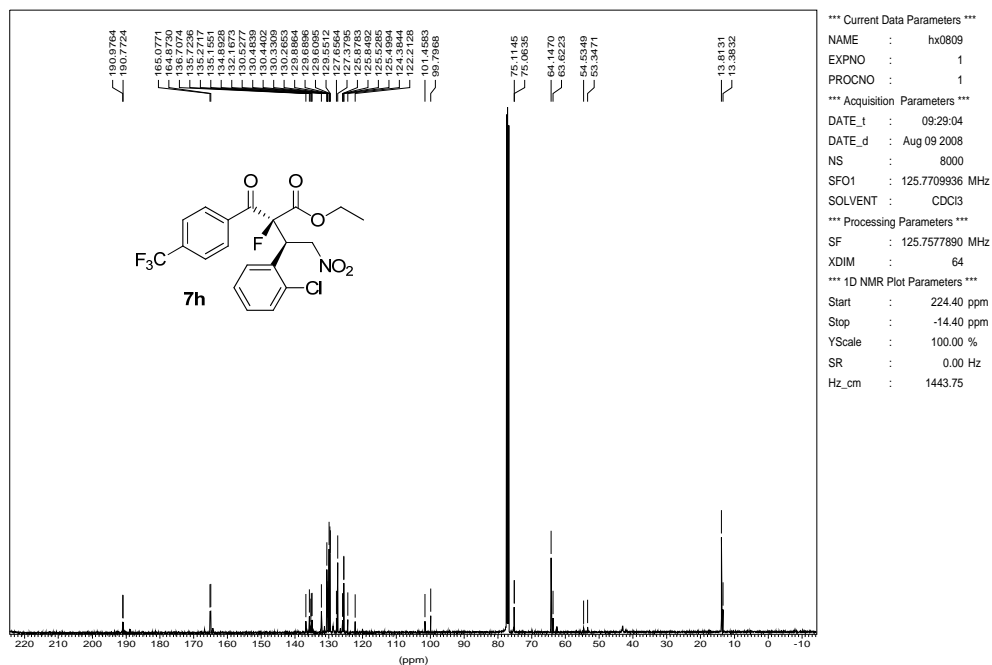



<sup>1</sup>H normal range AC300 941

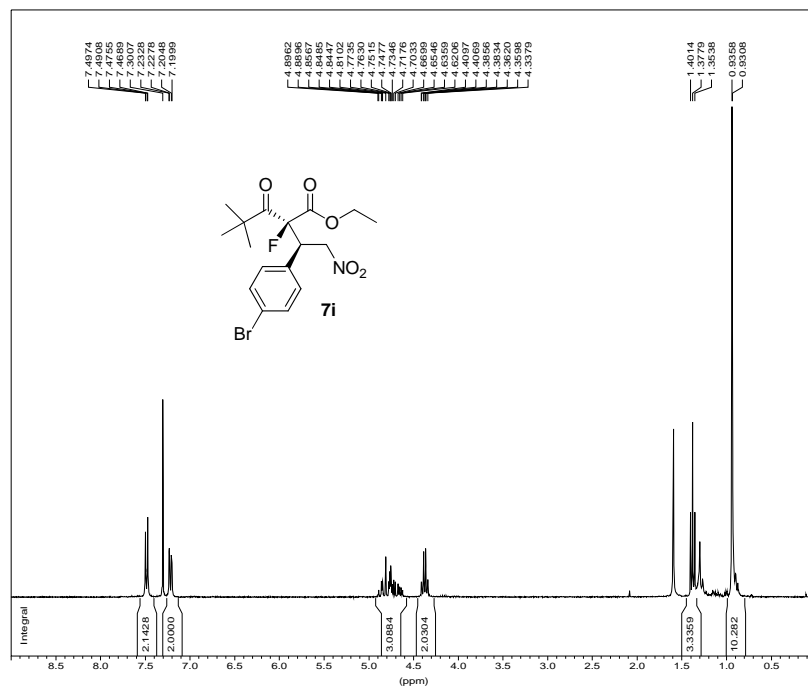

\*\*\* Current Data Parameters \*\*\*

NAME : j23hrj  
 EXPNO : 5  
 PROCNO : 1  
 \*\*\* Acquisition Parameters \*\*\*  
 DATE\_t : 08:03:12  
 DATE\_d : Jul 23 2008  
 NS : 8  
 SFO1 : 300.1318534 MHz  
 SOLVENT : CDCl3  
 \*\*\* Processing Parameters \*\*\*  
 SF : 300.1300000 MHz  
 XDIM : 8192  
 \*\*\* 1D NMR Plot Parameters \*\*\*  
 Start : 9.00 ppm  
 Stop : 0.00 ppm  
 YScale : 100.00 %  
 SR : 0.00 Hz  
 Hz\_cm : 129.87

<sup>13</sup>C Standard AC300 940 chiral

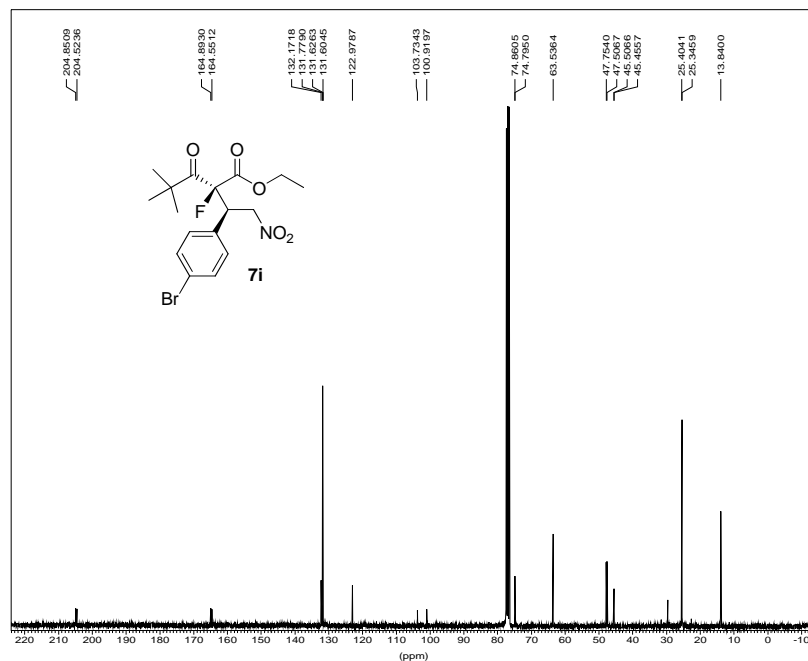

\*\*\* Current Data Parameters \*\*\*

NAME : j28hanx  
 EXPNO : 2  
 PROCNO : 1  
 \*\*\* Acquisition Parameters \*\*\*  
 DATE\_t : 09:48:20  
 DATE\_d : Jul 28 2008  
 NS : 14910  
 SFO1 : 75.4756731 MHz  
 SOLVENT : CDCl3  
 \*\*\* Processing Parameters \*\*\*  
 SF : 75.4677567 MHz  
 XDIM : 64  
 \*\*\* 1D NMR Plot Parameters \*\*\*  
 Start : 224.06 ppm  
 Stop : -14.26 ppm  
 YScale : 100.00 %  
 SR : 7.70 Hz  
 Hz\_cm : 864.69

<sup>1</sup>H normal range AC300 943

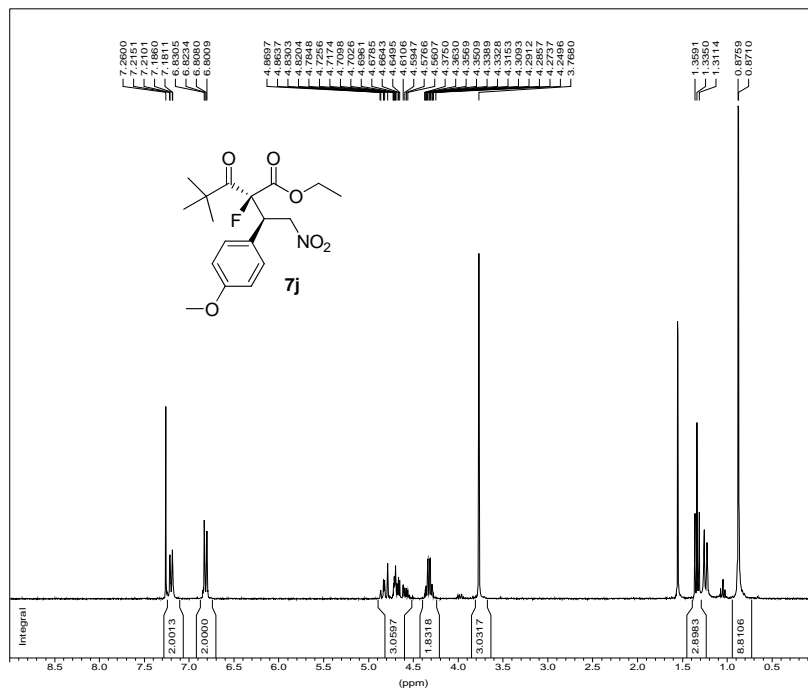

\*\*\* Current Data Parameters \*\*\*  
 NAME : j23hrj  
 EXPNO : 6  
 PROCNO : 1  
 \*\*\* Acquisition Parameters \*\*\*  
 DATE\_t : 08:04:52  
 DATE\_d : Jul 23 2008  
 NS : 6  
 SFO1 : 300.1318534 MHz  
 SOLVENT : CDCl3  
 \*\*\* Processing Parameters \*\*\*  
 SF : 300.1300120 MHz  
 XDIM : 8192  
 \*\*\* 1D NMR Plot Parameters \*\*\*  
 Start : 9.00 ppm  
 Stop : 0.00 ppm  
 YScale : 100.00 %  
 SR : 12.21 Hz  
 Hz\_cm : 129.87

<sup>13</sup>C AMX500 942 chiral

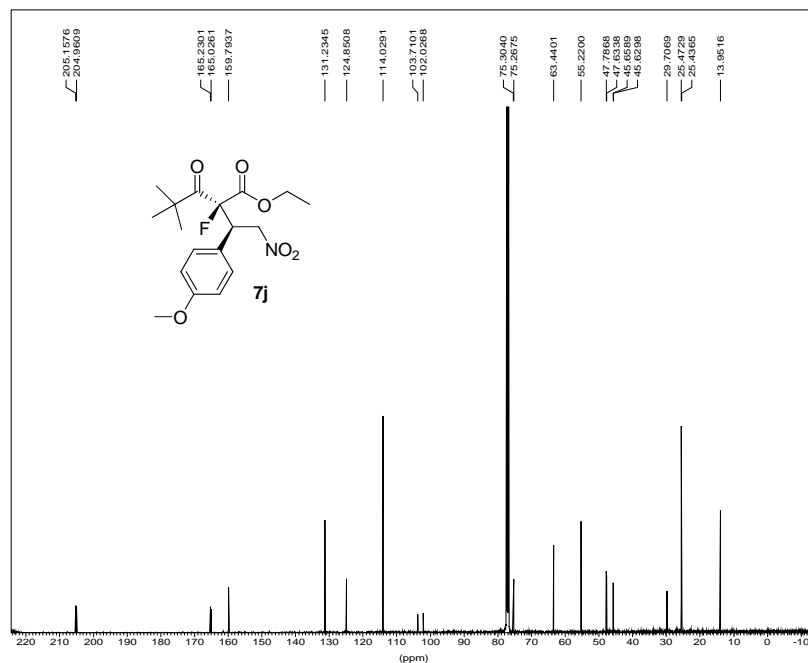

\*\*\* Current Data Parameters \*\*\*  
 NAME : hx0727  
 EXPNO : 4  
 PROCNO : 1  
 \*\*\* Acquisition Parameters \*\*\*  
 DATE\_t : 09:32:26  
 DATE\_d : Jul 27 2008  
 NS : 9641  
 SFO1 : 125.7709936 MHz  
 SOLVENT : CDCl3  
 \*\*\* Processing Parameters \*\*\*  
 SF : 125.7577890 MHz  
 XDIM : 64  
 \*\*\* 1D NMR Plot Parameters \*\*\*  
 Start : 224.40 ppm  
 Stop : -14.40 ppm  
 YScale : 50.00 %  
 SR : 0.00 Hz  
 Hz\_cm : 1443.75

<sup>1</sup>H AMX500 1328

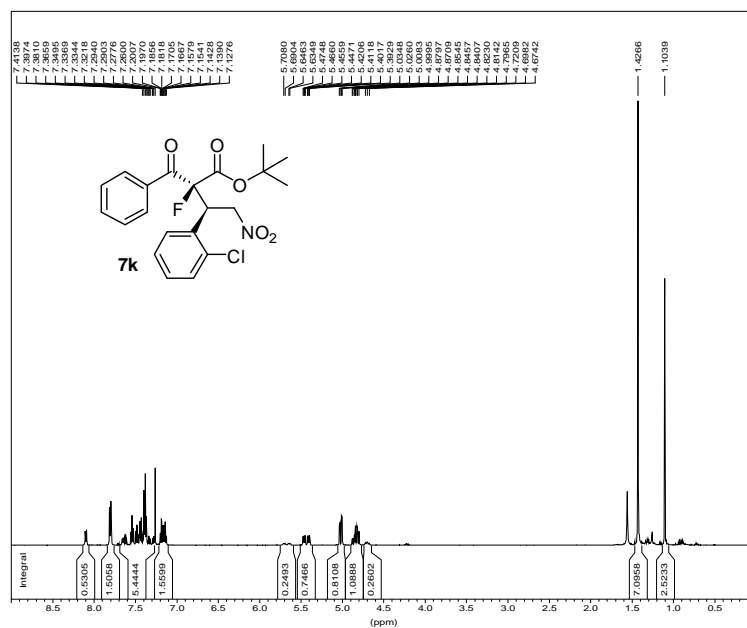

\*\*\* Current Data Parameters \*\*\*  
 NAME : hx0207  
 EXPNO : 3  
 PROCNO : 1  
 \*\*\* Acquisition Parameters \*\*\*  
 DATE\_t : 08:10:22  
 DATE\_d : Feb 07 2009  
 DBPNAM7 :  
 DS : 0  
 NS : 8  
 O1 : 3088.51 Hz  
 O2 : 3088.51 Hz  
 O3 : 3088.51 Hz  
 SFO1 : 500.1330885 MHz  
 SFO2 : 500.1330885 MHz  
 SFO3 : 500.1330885 MHz  
 SOLVENT : CDCl3  
 \*\*\* Processing Parameters \*\*\*  
 AZFW : 0.100 ppm  
 \*\*\* 1D NMR Plot Parameters \*\*\*  
 SR : 13.69 Hz

<sup>13</sup>C AMX500 1328

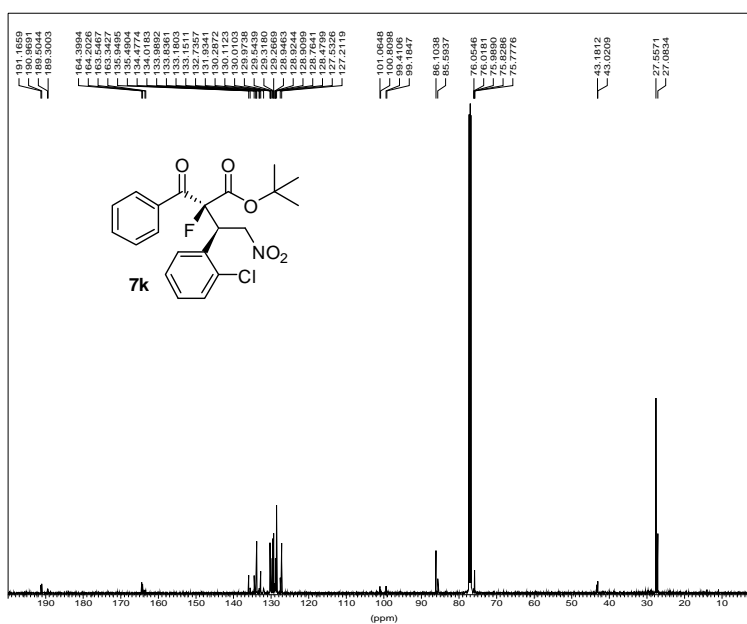

\*\*\* Current Data Parameters \*\*\*  
 NAME : hx0207  
 EXPNO : 4  
 PROCNO : 1  
 \*\*\* Acquisition Parameters \*\*\*  
 DATE\_t : 08:12:56  
 DATE\_d : Feb 07 2009  
 DBPNAM7 :  
 DS : 0  
 NS : 10298  
 O1 : 13204.57 Hz  
 O2 : 2000.52 Hz  
 O3 : 12575.30 Hz  
 SFO1 : 125.7709836 MHz  
 SFO2 : 500.1320005 MHz  
 SFO3 : 125.7703643 MHz  
 SOLVENT : CDCl3  
 \*\*\* Processing Parameters \*\*\*  
 AZFW : 0.500 ppm  
 \*\*\* 1D NMR Plot Parameters \*\*\*  
 SR : 0.00 Hz

1H normal range AC300 996

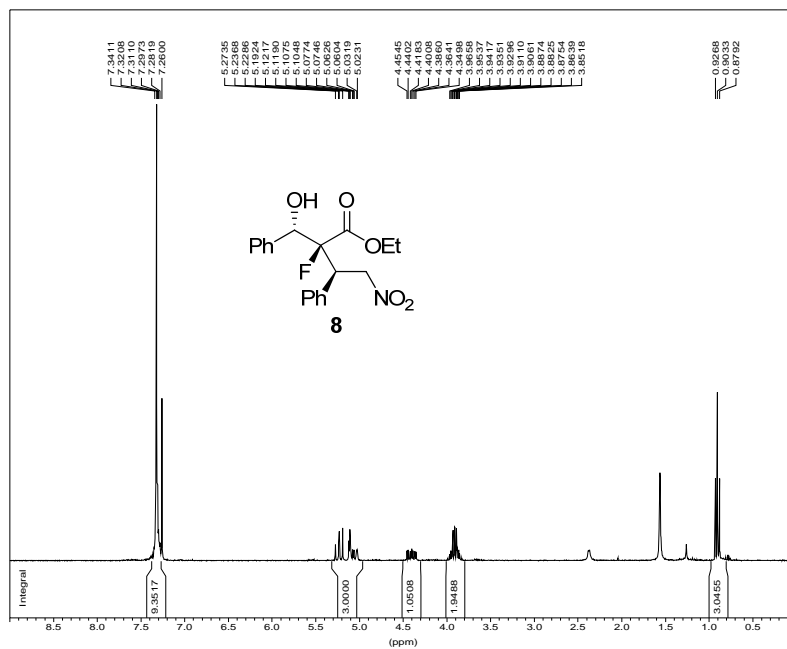

\*\*\* Current Data Parameters \*\*\*  
NAME : ag27ha-1  
EXPNO : 1  
PROCNO : 1  
\*\*\* Acquisition Parameters \*\*\*  
DATE\_t : 07:53:36  
DATE\_d : Aug 27 2008  
NS : 8  
SFO1 : 300.1318534 MHz  
SOLVENT : CDCl3  
\*\*\* Processing Parameters \*\*\*  
SF : 300.1300120 MHz  
XDIM : 8192  
\*\*\* 1D NMR Plot Parameters \*\*\*  
Start : 9.00 ppm  
Stop : 0.00 ppm  
YScale : 100.00 %  
SR : 12.21 Hz  
Hz\_cm : 129.87

13C AMX500 996

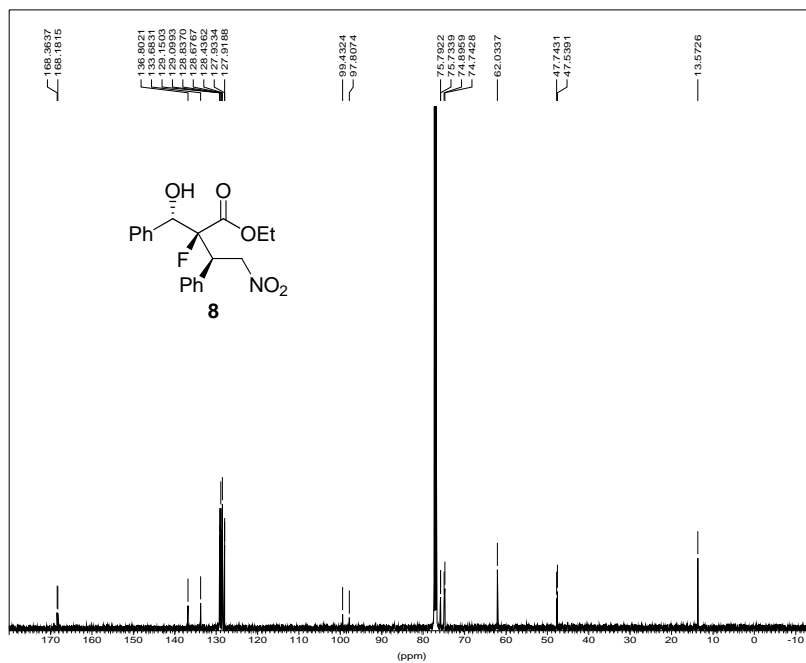

\*\*\* Current Data Parameters \*\*\*  
NAME : hx0831  
EXPNO : 1  
PROCNO : 1  
\*\*\* Acquisition Parameters \*\*\*  
DATE\_t : 06:37:53  
DATE\_d : Aug 31 2008  
NS : 2181  
SFO1 : 125.7709936 MHz  
SOLVENT : CDCl3  
\*\*\* Processing Parameters \*\*\*  
SF : 125.7577890 MHz  
XDIM : 64  
\*\*\* 1D NMR Plot Parameters \*\*\*  
Start : 180.00 ppm  
Stop : -14.40 ppm  
YScale : 50.00 %  
SR : 0.00 Hz  
Hz\_cm : 1175.34

1H AMX500 989

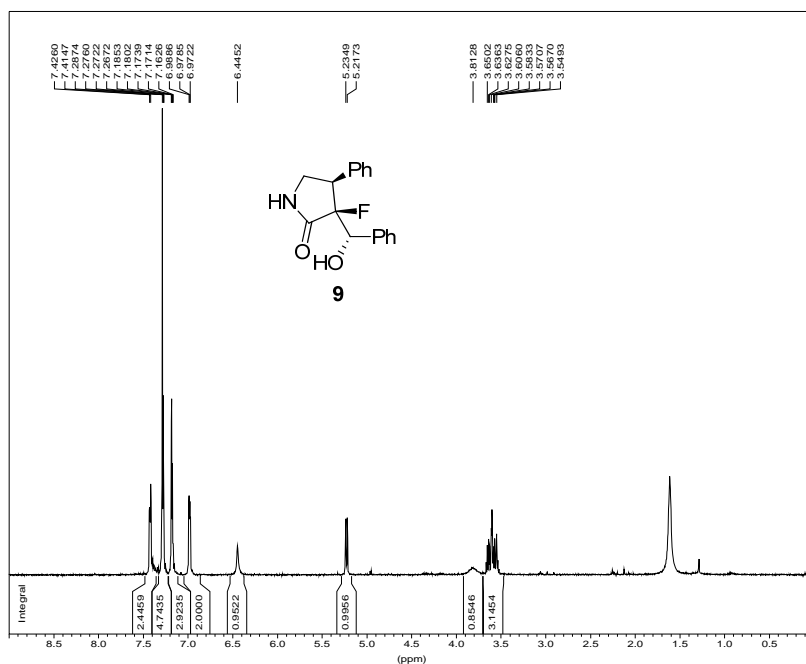

\*\*\* Current Data Parameters \*\*\*  
NAME : hanx0821  
EXPNO : 3  
PROCNO : 1  
\*\*\* Acquisition Parameters \*\*\*  
DATE\_t : 08:56:37  
DATE\_d : Aug 21 2008  
NS : 8  
SFO1 : 500.1330885 MHz  
SOLVENT : CDCl3  
\*\*\* Processing Parameters \*\*\*  
SF : 500.1300000 MHz  
XDIM : 8192  
\*\*\* 1D NMR Plot Parameters \*\*\*  
Start : 9.00 ppm  
Stop : 0.00 ppm  
YScale : 100.00 %  
SR : 0.00 Hz  
Hz\_cm : 216.41

13C AMX500 989

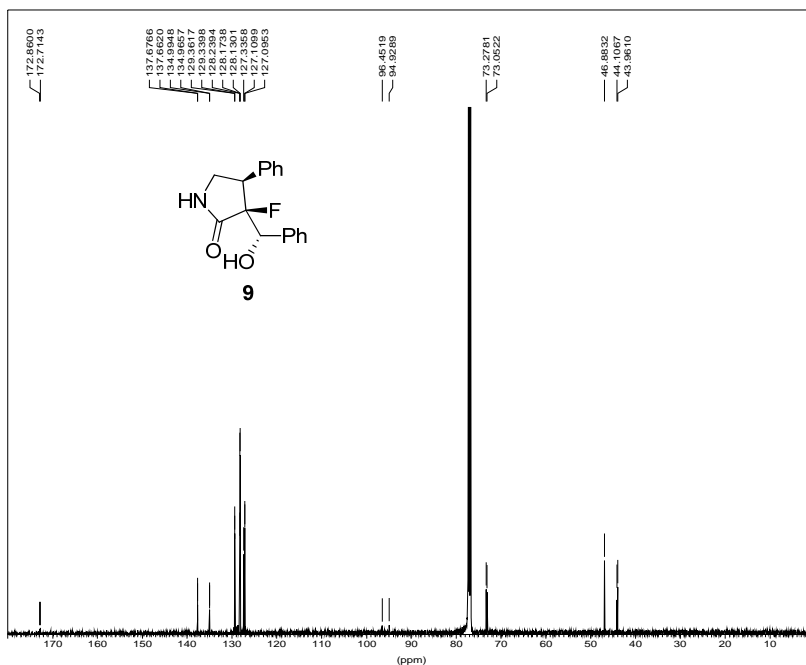

\*\*\* Current Data Parameters \*\*\*  
NAME : hanx0821  
EXPNO : 4  
PROCNO : 1  
\*\*\* Acquisition Parameters \*\*\*  
DATE\_t : 08:59:59  
DATE\_d : Aug 21 2008  
NS : 9780  
SFO1 : 125.7709936 MHz  
SOLVENT : CDCl3  
\*\*\* Processing Parameters \*\*\*  
SF : 125.7577890 MHz  
XDIM : 64  
\*\*\* 1D NMR Plot Parameters \*\*\*  
Start : 180.00 ppm  
Stop : 0.00 ppm  
YScale : 25.00 %  
SR : 0.00 Hz  
Hz\_cm : 1088.28

1H AMX500 988 2 step

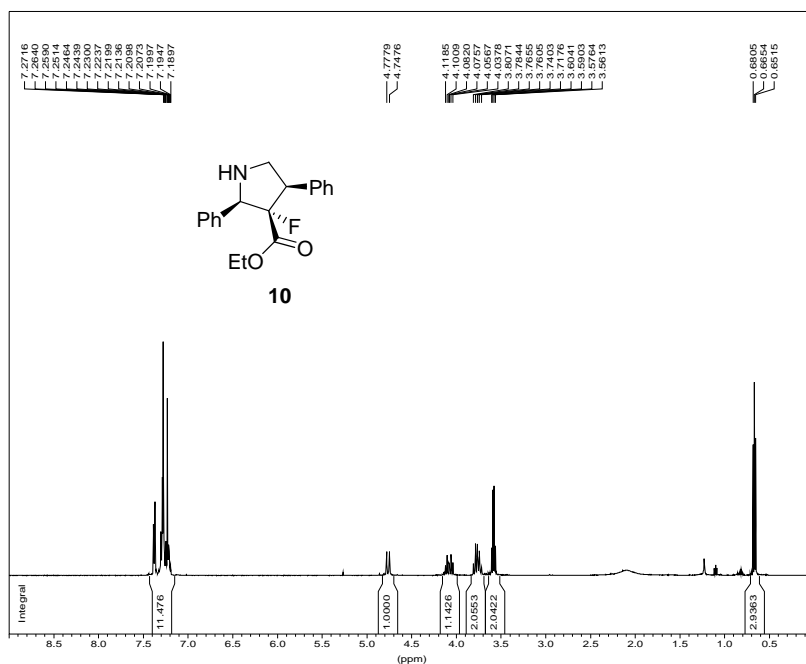

\*\*\* Current Data Parameters \*\*\*  
 NAME : hanx0821  
 EXPNO : 2  
 PROCNO : 1  
 \*\*\* Acquisition Parameters \*\*\*  
 DATE\_t : 06:53:02  
 DATE\_d : Aug 21 2008  
 NS : 8  
 SFO1 : 500.1330885 MHz  
 SOLVENT : CDCl3  
 \*\*\* Processing Parameters \*\*\*  
 SF : 500.1300290 MHz  
 XDIM : 8192  
 \*\*\* 1D NMR Plot Parameters \*\*\*  
 Start : 9.00 ppm  
 Stop : 0.00 ppm  
 YScale : 200.00 %  
 SR : 28.69 Hz  
 Hz\_cm : 216.38

13C AMX500 988 2-step

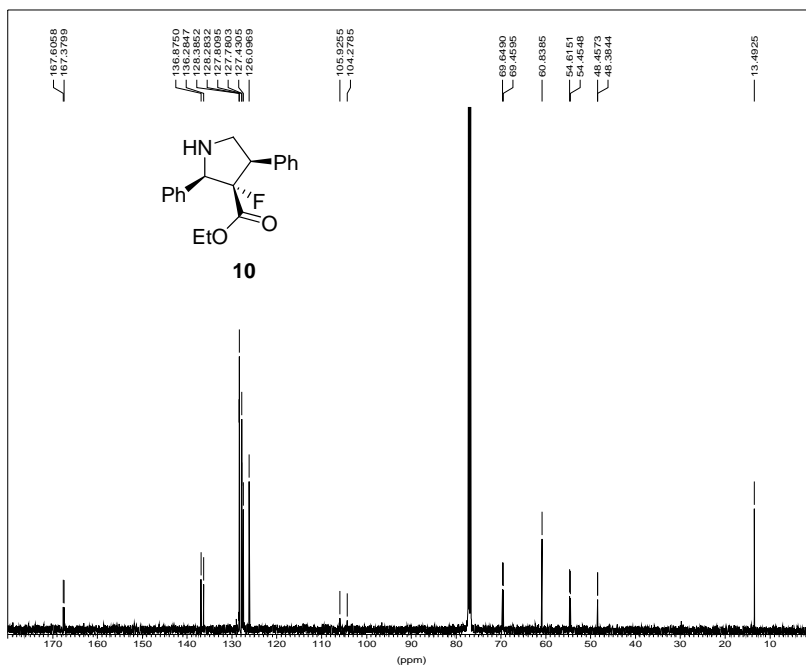

\*\*\* Current Data Parameters \*\*\*  
 NAME : hanx0821  
 EXPNO : 1  
 PROCNO : 1  
 \*\*\* Acquisition Parameters \*\*\*  
 DATE\_t : 06:56:01  
 DATE\_d : Aug 21 2008  
 NS : 1232  
 SFO1 : 125.7709936 MHz  
 SOLVENT : CDCl3  
 \*\*\* Processing Parameters \*\*\*  
 SF : 125.7577890 MHz  
 XDIM : 64  
 \*\*\* 1D NMR Plot Parameters \*\*\*  
 Start : 180.00 ppm  
 Stop : 0.00 ppm  
 YScale : 50.00 %  
 SR : 0.00 Hz  
 Hz\_cm : 1088.28

1H AMX500 1026 chral

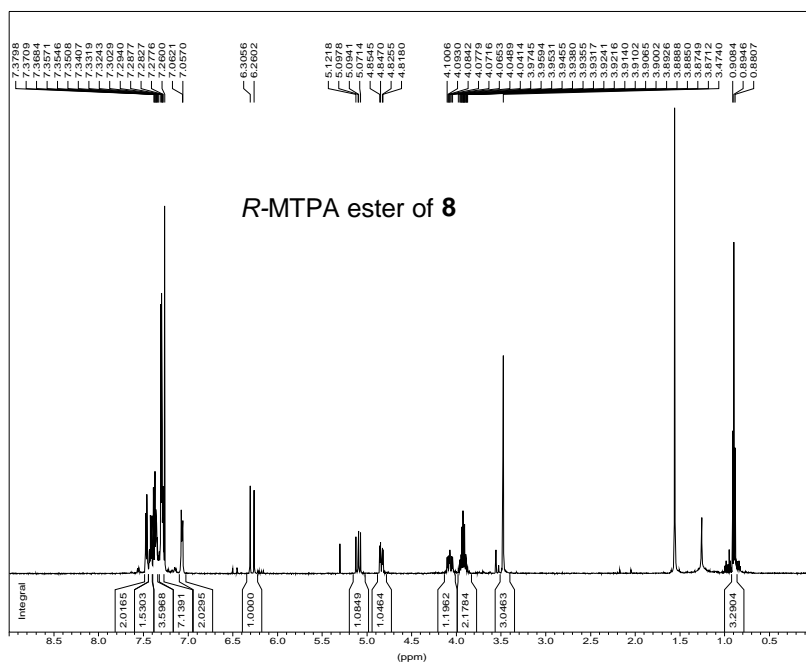

\*\*\* Current Data Parameters \*\*\*  
 NAME : hanx0918  
 EXPNO : 1  
 PROCNO : 1  
 \*\*\* Acquisition Parameters \*\*\*  
 DATE\_t : 08:25:10  
 DATE\_d : Sep 18 2008  
 NS : 8  
 SFO1 : 500.1330885 MHz  
 SOLVENT : CDCl3  
 \*\*\* Processing Parameters \*\*\*  
 SF : 500.1300140 MHz  
 XDIM : 8192  
 \*\*\* 1D NMR Plot Parameters \*\*\*  
 Start : 9.00 ppm  
 Stop : 0.00 ppm  
 YScale : 100.00 %  
 SR : 13.69 Hz  
 Hz\_cm : 216.41

13C AMX500 1026

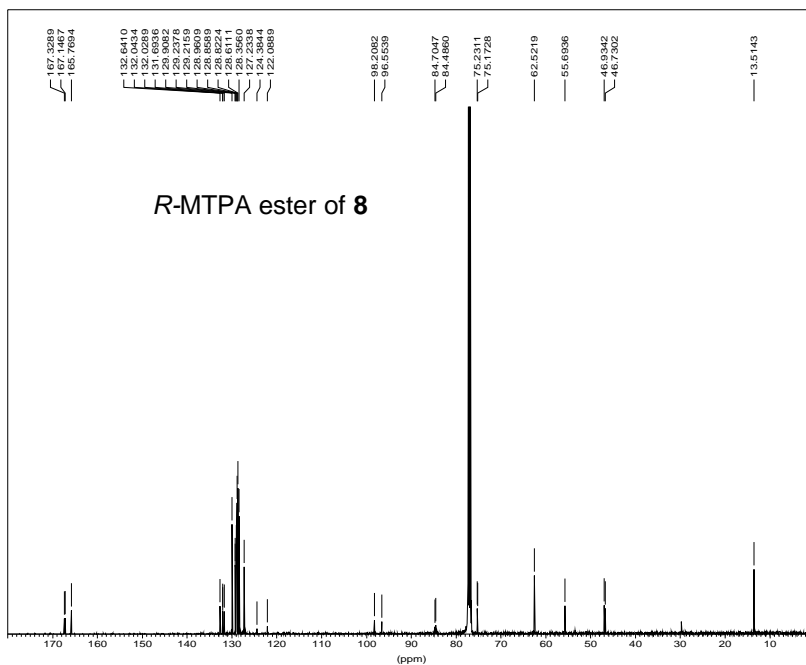

\*\*\* Current Data Parameters \*\*\*  
 NAME : hanx0919  
 EXPNO : 1  
 PROCNO : 1  
 \*\*\* Acquisition Parameters \*\*\*  
 DATE\_t : 09:33:12  
 DATE\_d : Sep 19 2008  
 NS : 9662  
 SFO1 : 125.7709936 MHz  
 SOLVENT : CDCl3  
 \*\*\* Processing Parameters \*\*\*  
 SF : 125.7577890 MHz  
 XDIM : 64  
 \*\*\* 1D NMR Plot Parameters \*\*\*  
 Start : 180.00 ppm  
 Stop : 0.00 ppm  
 YScale : 100.00 %  
 SR : 0.00 Hz  
 Hz\_cm : 1088.28

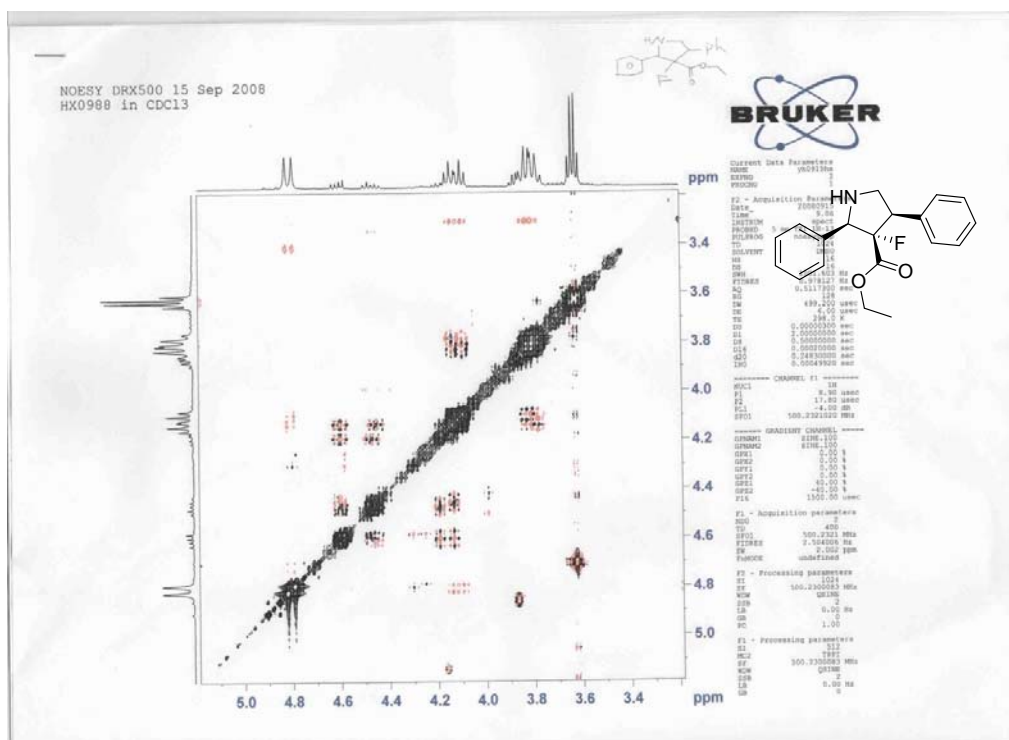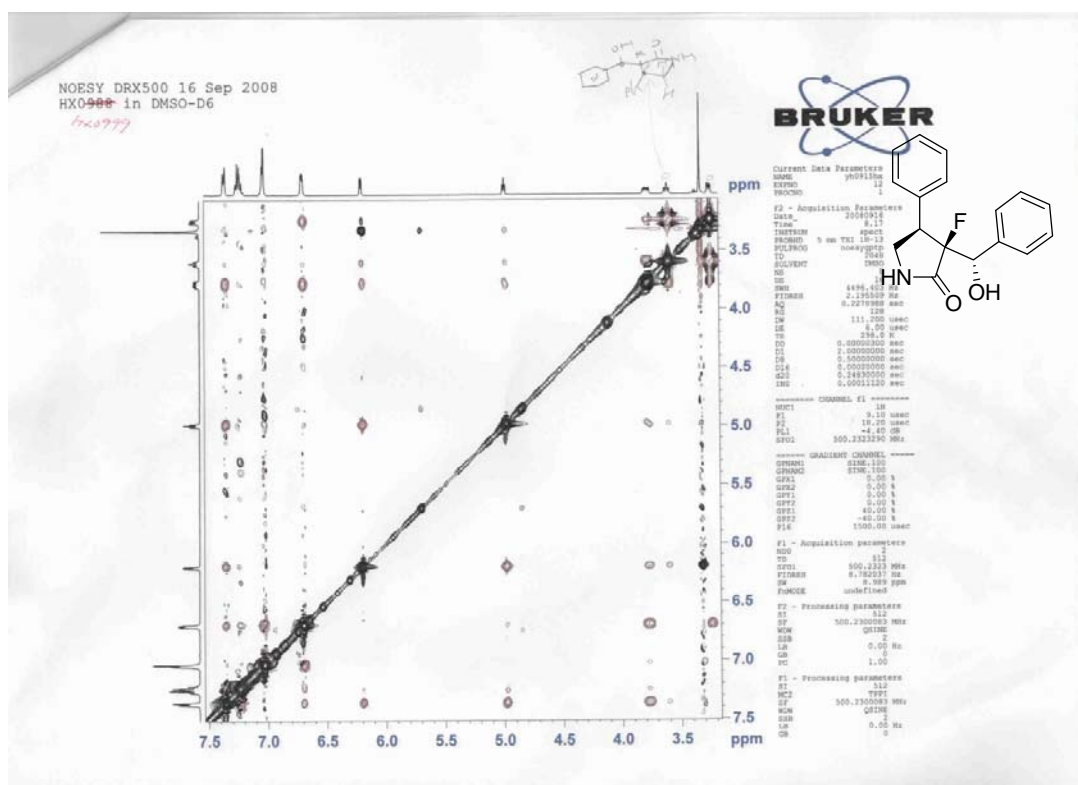

Supplement: b823184b.pdf [file b823184b.pdf]
